# Supplementary material for: PiGx: reproducible genomics analysis pipelines with GNU Guix
Source: PubMed Central journal article supplement (PMC6275446; doi:10.1093/gigascience/giy123), 2018-10-02
Supplement: giy123_giga-d-18-00155_revision_1.pdf [file giy123_giga-d-18-00155_revision_1.pdf]

|                                                      |                                                                                                                                                                                                                                                                                                                                                                                                                                                                                                                                                                                                                                                                                                                                                                                                                                                                                                                                                                                                                                                                                                                                                                                                                                                                                                                                                                                                                                                                                                                                                                                                                                                                                                                                                                                                                                                                                                                                                                                                                                                                                |                         |
|------------------------------------------------------|--------------------------------------------------------------------------------------------------------------------------------------------------------------------------------------------------------------------------------------------------------------------------------------------------------------------------------------------------------------------------------------------------------------------------------------------------------------------------------------------------------------------------------------------------------------------------------------------------------------------------------------------------------------------------------------------------------------------------------------------------------------------------------------------------------------------------------------------------------------------------------------------------------------------------------------------------------------------------------------------------------------------------------------------------------------------------------------------------------------------------------------------------------------------------------------------------------------------------------------------------------------------------------------------------------------------------------------------------------------------------------------------------------------------------------------------------------------------------------------------------------------------------------------------------------------------------------------------------------------------------------------------------------------------------------------------------------------------------------------------------------------------------------------------------------------------------------------------------------------------------------------------------------------------------------------------------------------------------------------------------------------------------------------------------------------------------------|-------------------------|
| <b>Manuscript Number:</b>                            | GIGA-D-18-00155R1                                                                                                                                                                                                                                                                                                                                                                                                                                                                                                                                                                                                                                                                                                                                                                                                                                                                                                                                                                                                                                                                                                                                                                                                                                                                                                                                                                                                                                                                                                                                                                                                                                                                                                                                                                                                                                                                                                                                                                                                                                                              |                         |
| <b>Full Title:</b>                                   | Reproducible genomics analysis pipelines with GNU Guix                                                                                                                                                                                                                                                                                                                                                                                                                                                                                                                                                                                                                                                                                                                                                                                                                                                                                                                                                                                                                                                                                                                                                                                                                                                                                                                                                                                                                                                                                                                                                                                                                                                                                                                                                                                                                                                                                                                                                                                                                         |                         |
| <b>Article Type:</b>                                 | Technical Note                                                                                                                                                                                                                                                                                                                                                                                                                                                                                                                                                                                                                                                                                                                                                                                                                                                                                                                                                                                                                                                                                                                                                                                                                                                                                                                                                                                                                                                                                                                                                                                                                                                                                                                                                                                                                                                                                                                                                                                                                                                                 |                         |
| <b>Funding Information:</b>                          | German Federal Ministry of Education and Research (BMBF) (031 A538C RBC)                                                                                                                                                                                                                                                                                                                                                                                                                                                                                                                                                                                                                                                                                                                                                                                                                                                                                                                                                                                                                                                                                                                                                                                                                                                                                                                                                                                                                                                                                                                                                                                                                                                                                                                                                                                                                                                                                                                                                                                                       | Dr Bora Uyar            |
|                                                      | Berlin Institute for Health                                                                                                                                                                                                                                                                                                                                                                                                                                                                                                                                                                                                                                                                                                                                                                                                                                                                                                                                                                                                                                                                                                                                                                                                                                                                                                                                                                                                                                                                                                                                                                                                                                                                                                                                                                                                                                                                                                                                                                                                                                                    | Mrs Katarzyna Wreczycka |
|                                                      | H2020 Research Infrastructures (654248)                                                                                                                                                                                                                                                                                                                                                                                                                                                                                                                                                                                                                                                                                                                                                                                                                                                                                                                                                                                                                                                                                                                                                                                                                                                                                                                                                                                                                                                                                                                                                                                                                                                                                                                                                                                                                                                                                                                                                                                                                                        | Dr Brendan Osberg       |
| <b>Abstract:</b>                                     | <p>In bioinformatics, as well as other computationally-intensive research fields, there is a need for workflows that can reliably produce consistent output, from known sources, independent of the software environment or configuration settings of the machine on which they are executed. Indeed, this is essential for controlled comparison between different observations or for the wider dissemination of workflows. Providing this type of reproducibility and traceability, however, is often complicated by the need to accommodate the myriad dependencies included in a larger body of software, each of which generally come in various versions. Moreover, in many fields (bioinformatics being a prime example), these versions are subject to continual change due to rapidly evolving technologies, further complicating problems related to reproducibility. Here, we propose a principled approach for building analysis pipelines and managing their dependencies. As a case study to demonstrate the utility of our approach, we present a set of highly reproducible pipelines for the analysis of RNA-seq, ChIP-seq, Bisulfite-seq, and single-cell RNA-seq. All pipelines process raw experimental data, and generate reports containing publication-ready plots and figures, with interactive report elements and standard observables. Users may install these highly reproducible packages and apply them to their own datasets without any special computational expertise beyond the use of the command line. We hope such a toolkit will provide immediate benefit to laboratory workers wishing to process their own data sets or bioinformaticians seeking to automate all, or parts of, their analyses. In the long term, we hope our approach to reproducibility will serve as a blueprint for reproducible workflows in other areas. Our pipelines, along with their corresponding documentation and sample reports, are available at <a href="http://bioinformatics.mdc-berlin.de/pigx">http://bioinformatics.mdc-berlin.de/pigx</a></p> |                         |
| <b>Corresponding Author:</b>                         | Altuna Akalin                                                                                                                                                                                                                                                                                                                                                                                                                                                                                                                                                                                                                                                                                                                                                                                                                                                                                                                                                                                                                                                                                                                                                                                                                                                                                                                                                                                                                                                                                                                                                                                                                                                                                                                                                                                                                                                                                                                                                                                                                                                                  |                         |
| <b>Corresponding Author Secondary Information:</b>   |                                                                                                                                                                                                                                                                                                                                                                                                                                                                                                                                                                                                                                                                                                                                                                                                                                                                                                                                                                                                                                                                                                                                                                                                                                                                                                                                                                                                                                                                                                                                                                                                                                                                                                                                                                                                                                                                                                                                                                                                                                                                                |                         |
| <b>Corresponding Author's Institution:</b>           |                                                                                                                                                                                                                                                                                                                                                                                                                                                                                                                                                                                                                                                                                                                                                                                                                                                                                                                                                                                                                                                                                                                                                                                                                                                                                                                                                                                                                                                                                                                                                                                                                                                                                                                                                                                                                                                                                                                                                                                                                                                                                |                         |
| <b>Corresponding Author's Secondary Institution:</b> |                                                                                                                                                                                                                                                                                                                                                                                                                                                                                                                                                                                                                                                                                                                                                                                                                                                                                                                                                                                                                                                                                                                                                                                                                                                                                                                                                                                                                                                                                                                                                                                                                                                                                                                                                                                                                                                                                                                                                                                                                                                                                |                         |
| <b>First Author:</b>                                 | Ricardo Wurmus                                                                                                                                                                                                                                                                                                                                                                                                                                                                                                                                                                                                                                                                                                                                                                                                                                                                                                                                                                                                                                                                                                                                                                                                                                                                                                                                                                                                                                                                                                                                                                                                                                                                                                                                                                                                                                                                                                                                                                                                                                                                 |                         |
| <b>First Author Secondary Information:</b>           |                                                                                                                                                                                                                                                                                                                                                                                                                                                                                                                                                                                                                                                                                                                                                                                                                                                                                                                                                                                                                                                                                                                                                                                                                                                                                                                                                                                                                                                                                                                                                                                                                                                                                                                                                                                                                                                                                                                                                                                                                                                                                |                         |
| <b>Order of Authors:</b>                             | Ricardo Wurmus                                                                                                                                                                                                                                                                                                                                                                                                                                                                                                                                                                                                                                                                                                                                                                                                                                                                                                                                                                                                                                                                                                                                                                                                                                                                                                                                                                                                                                                                                                                                                                                                                                                                                                                                                                                                                                                                                                                                                                                                                                                                 |                         |
|                                                      | Bora Uyar                                                                                                                                                                                                                                                                                                                                                                                                                                                                                                                                                                                                                                                                                                                                                                                                                                                                                                                                                                                                                                                                                                                                                                                                                                                                                                                                                                                                                                                                                                                                                                                                                                                                                                                                                                                                                                                                                                                                                                                                                                                                      |                         |
|                                                      | Brendan Osberg                                                                                                                                                                                                                                                                                                                                                                                                                                                                                                                                                                                                                                                                                                                                                                                                                                                                                                                                                                                                                                                                                                                                                                                                                                                                                                                                                                                                                                                                                                                                                                                                                                                                                                                                                                                                                                                                                                                                                                                                                                                                 |                         |
|                                                      | Vedran Franke                                                                                                                                                                                                                                                                                                                                                                                                                                                                                                                                                                                                                                                                                                                                                                                                                                                                                                                                                                                                                                                                                                                                                                                                                                                                                                                                                                                                                                                                                                                                                                                                                                                                                                                                                                                                                                                                                                                                                                                                                                                                  |                         |
|                                                      | Alexander Gossdchan                                                                                                                                                                                                                                                                                                                                                                                                                                                                                                                                                                                                                                                                                                                                                                                                                                                                                                                                                                                                                                                                                                                                                                                                                                                                                                                                                                                                                                                                                                                                                                                                                                                                                                                                                                                                                                                                                                                                                                                                                                                            |                         |
|                                                      | Katarzyna Wreczycka                                                                                                                                                                                                                                                                                                                                                                                                                                                                                                                                                                                                                                                                                                                                                                                                                                                                                                                                                                                                                                                                                                                                                                                                                                                                                                                                                                                                                                                                                                                                                                                                                                                                                                                                                                                                                                                                                                                                                                                                                                                            |                         |
|                                                      | Jonathan Ronen                                                                                                                                                                                                                                                                                                                                                                                                                                                                                                                                                                                                                                                                                                                                                                                                                                                                                                                                                                                                                                                                                                                                                                                                                                                                                                                                                                                                                                                                                                                                                                                                                                                                                                                                                                                                                                                                                                                                                                                                                                                                 |                         |

|                                                |                                                                                                                                                                                                                                                                                                                                                                                                                                                                                                                                                                                                                                                                                                                                                                                                                                                                                                                                                                                                                                                                                                                                                                                                                                                                                                                                                                                                                                                                                                                                                                                                                                                                                                                                                                                                                                                                                                                                                                                                                                                                                                                                                                                                                                                                                                                                                                                                                                                                                                                                                                                                                                                                                                                                                                                                                                                                                                                                                                                                                                                                                                                                                                                                                                                                                                                                                                                                                                                                                                                                                                                                                                                                                                                                                                                                                                                                                                                                                                                                                                                                                                                                                                                                                                                                                                                                                                                                            |
|------------------------------------------------|------------------------------------------------------------------------------------------------------------------------------------------------------------------------------------------------------------------------------------------------------------------------------------------------------------------------------------------------------------------------------------------------------------------------------------------------------------------------------------------------------------------------------------------------------------------------------------------------------------------------------------------------------------------------------------------------------------------------------------------------------------------------------------------------------------------------------------------------------------------------------------------------------------------------------------------------------------------------------------------------------------------------------------------------------------------------------------------------------------------------------------------------------------------------------------------------------------------------------------------------------------------------------------------------------------------------------------------------------------------------------------------------------------------------------------------------------------------------------------------------------------------------------------------------------------------------------------------------------------------------------------------------------------------------------------------------------------------------------------------------------------------------------------------------------------------------------------------------------------------------------------------------------------------------------------------------------------------------------------------------------------------------------------------------------------------------------------------------------------------------------------------------------------------------------------------------------------------------------------------------------------------------------------------------------------------------------------------------------------------------------------------------------------------------------------------------------------------------------------------------------------------------------------------------------------------------------------------------------------------------------------------------------------------------------------------------------------------------------------------------------------------------------------------------------------------------------------------------------------------------------------------------------------------------------------------------------------------------------------------------------------------------------------------------------------------------------------------------------------------------------------------------------------------------------------------------------------------------------------------------------------------------------------------------------------------------------------------------------------------------------------------------------------------------------------------------------------------------------------------------------------------------------------------------------------------------------------------------------------------------------------------------------------------------------------------------------------------------------------------------------------------------------------------------------------------------------------------------------------------------------------------------------------------------------------------------------------------------------------------------------------------------------------------------------------------------------------------------------------------------------------------------------------------------------------------------------------------------------------------------------------------------------------------------------------------------------------------------------------------------------------------------------------|
|                                                | Altuna Akalin                                                                                                                                                                                                                                                                                                                                                                                                                                                                                                                                                                                                                                                                                                                                                                                                                                                                                                                                                                                                                                                                                                                                                                                                                                                                                                                                                                                                                                                                                                                                                                                                                                                                                                                                                                                                                                                                                                                                                                                                                                                                                                                                                                                                                                                                                                                                                                                                                                                                                                                                                                                                                                                                                                                                                                                                                                                                                                                                                                                                                                                                                                                                                                                                                                                                                                                                                                                                                                                                                                                                                                                                                                                                                                                                                                                                                                                                                                                                                                                                                                                                                                                                                                                                                                                                                                                                                                                              |
| <b>Order of Authors Secondary Information:</b> |                                                                                                                                                                                                                                                                                                                                                                                                                                                                                                                                                                                                                                                                                                                                                                                                                                                                                                                                                                                                                                                                                                                                                                                                                                                                                                                                                                                                                                                                                                                                                                                                                                                                                                                                                                                                                                                                                                                                                                                                                                                                                                                                                                                                                                                                                                                                                                                                                                                                                                                                                                                                                                                                                                                                                                                                                                                                                                                                                                                                                                                                                                                                                                                                                                                                                                                                                                                                                                                                                                                                                                                                                                                                                                                                                                                                                                                                                                                                                                                                                                                                                                                                                                                                                                                                                                                                                                                                            |
| <b>Response to Reviewers:</b>                  | <p>Reviewer #1: The authors introduce a method that enables reproducible genomic analyses based on GNU Guix, an open source package manager based on a functional/transactional paradigm.</p> <p>The main strength of this method is the ability to capture the full graph of a data analysis dependencies both for the build and execution environments.</p> <p>The manuscript is well written and easy to read, however there are some points that need to be clarified or reviewed:</p> <p>* When discussing the usage of containers for data analysis reproducibility, the authors say: "Containers and binary disk images alone do not make traditional tooling any more suitable for the purpose of reproducible science". This statement does not provide an objective representation of the state of container technology. While containers are not a perfect solution, they have quickly become a reference solution to the problem of reproducibility. Several authors have shown how this technology can be used to successfully address the problem of reproducibility of complex data analysis workflows, see (1), (2), (3). Containers can provide the same level of bit-by-bit reproducibility as claimed by the method proposed by the authors (if not higher). The problem of transparency can be easily solved following best practices or using community collections such as BioContainers.</p> <p>Response:<br/> We thank the reviewer for their feedback and agree that greater clarity is needed regarding the benefits of our approach over containers. For many end-users, the appeal of 'reproducibility' is clear enough, and indeed, containers offer bit-for-bit identical execution binaries with 'reproducibility' in the same sense as ours. Traceability (e.g. from source to application bundle), is somewhat more subtle, however, and it is here that containers fail to offer any indication as to the origin of the bits that make up an application bundle. Functional package management, on the other hand, offers referential transparency, whereby the full set of dependencies (and versions thereof) in a workspace are explicitly declared. Guix users need not rely on trust in developers' adherence to best practices to be confident of exactly which versions and sources are employed in a bundle, and to be certain that it is precisely these sources that have been used to generate their package. With Guix, there can be no undeclared dependencies, and malicious code cannot be hidden within an opaque binary bundle, but rather, must remain traceable to a specific source. Ref (A) shows the prevalence of potential security vulnerabilities in docker images, and the inheritance of such dependencies. This is of particular importance for data security in applications that have access to sensitive medical data, such as in bioinformatics. Indeed, as the authors of (1) state, Guix "represents the most rigorous approach towards dependency management". Secondly, the authors of (2) suggest that the concept of continuous integration be applied to rerun experiments automatically whenever updates to the source code or data are applied. Since container description languages limit declaration of dependencies to other containers, however, undeclared dependencies would be ineffective as 'triggers', and it is not always clear when the re-execution of such experiments would be necessary. Theoretically, container developers adhering to best-practices could maintain their containers' dependency lists; however, in practice, in large projects with many contributors, omission from human error becomes increasingly difficult to rule out. Guix ensures that dependencies are hard-coded into a package's construction, rather than relying on trust in 3rd parties. We have added text to the manuscript to highlight this distinction between simple 'reproducibility', and referentially transparent reproducibility offered by Guix, along with the significance thereof.</p> <p>* "Other package and environment managers .. fail to take the complete dependency graph into account, etc". This is a central point, the authors should provide a better description how the proposed method differs when compared to the other tools mentioned or provide a citation to sustain their claim.</p> |

Response:

As described in the above comments, Guix offers referential transparency, whereas containers depend on best-practices and judgement of the developer. Describing the detailed functional package management methodology behind Guix is beyond the scope of our work, but we agree that a citation is in order, and have added references to the works of Dolstra (2004) and Courtès (2015). The sentence in question has also been rephrased

\* The authors put a lot of emphasis on the "bit-by-bit" reproducibility of the method proposed, however they conclude that it's not always possible due to non-deterministic build procedures, timestamp in the source files, tools relying on external components downloaded from the internet, etc. Maybe a better definition would be "near bit-by-bit reproducibility". At this regard it should be noted that containers allow real bit-by-bit reproducibility in the extend the resulting images are distributed in a binary format ie. do not require to re-compilation of the graph of the dependencies.

Response:

We agree greater clarity is needed on the differences in 'reproducibility' offered by containers and functional package management.

Containers and functional package management are complementary approaches. The former is a means of deploying existing binaries, the latter serves to generate those binaries. For example, containers built from Dockerfiles will differ substantially when built on different systems or at different times, as their files are commonly produced by non-deterministic processes, such as downloads from third-party package repositories or non-deterministic build processes.

Guix shows that we can build complex applications --- and thus even container images --- in a bit-reproducible fashion without having to sacrifice referential transparency or binary provenance (i.e. knowledge of the origin of said binary). From that point, containers produced by Guix can be copied, distributed and used without any re-compilation, and offers all the same functionality as container images generated via other means.

We have clarified the differences and the caveats that apply to reproducibility in the functional package management model in the manuscript.

\* When discussing the reproducibility of the proposed method, it should be taken into account possible limiting factors. For example: the guix package is not usually available in common Linux distributions and its installation requires root permission. Also it's only available for the Linux operating system, therefore the applications depending on it cannot be deployed on different platforms. While this may not be a big problem for production scenarios, it can limit the application usage on computer platform commonly used for development and testing purpose. Finally, how accessible is a guix package definitions file, based on a functional notation, to an average user without knowledge of functional programming concepts and syntax?

Response:

It is true that, for the moment at least, Guix is only available on GNU+Linux systems. This has been now noted in the manuscript.

No knowledge of programming is required for the user to execute the pipelines described in the manuscript; it is sufficient that users merely enter a few commands in a terminal for installation and execution (as described in the online documentation). Even so, they reap the benefit of reproducibility that is provided by functional package management.

The definition of custom Guix packages requires moderate programming expertise. Guix implements a domain specific language (DSL) that is embedded in the general purpose programming language Guile Scheme. Guix can also automatically convert package specifications written in JSON to its package DSL, and offers recursive importers, which generate package specifications automatically from a variety of third-party repositories such as CRAN, Bioconductor, CPAN, Pypi, Hackage, etc.

We would like to emphasize that the reproducibility of our method does not depend on users installing Guix or writing package definitions themselves. They can benefit from bit-reproducibility in other target formats, such as self-executing tarballs, SquashFS images for use with Singularity, or Docker images, although we suggest using Guix as a language with which to describe and understand software environments.

We have added a short note regarding the level of proficiency expected of the user,

and the limitations of Guix-dependent workflows in the discussion.

\* In the results is shown the usage of "pigx", however is not discussed what is this tool and why is needed.

Response:

Indeed, the original manuscript left this unclear, and we thank the reviewer for pointing out this oversight. The set of pipelines that we describe are collectively called "PiGx", as an acronym for Pipelines in Genomics (where the 'x' is intended to aid the specificity of search results) We have clarified this in the manuscript.

\* When discussing the reproducibility of the proposed method the authors provide metrics to assess the reproducibility of the graph of dependencies for the same pipeline deployed across three different systems. This is an interesting analysis, however it should also be provided a more detailed discussion and quantification of the \*outputs\* of the pipeline executions in different systems. It is mentioned that the repeatability was impacted by the non-determinism of some of the component used in the pipelines. Have they tried to compare the results of a pipeline not containing any source of non-determinism?

Response:

For a pipeline without any non-deterministic elements (in our case, the bs-seq pigx pipeline) the analysis is indeed repeatable, when a common time-stamp is supplied via the SOURCE\_DATE\_EPOCH environment variable, yielding bit-for-bit identical HTML reports on different machines. We have included a brief comment specifically addressing reproducibility of the reports.

\* The authors should provide a detailed description how to replicate the execution of the data analysis pipelines described in the manuscript along with the used dataset.

Response:

Detailed description on the execution of the pipelines is provided in the online documentation, available here: [http://bioinformatics.mdc-berlin.de/pigx\\_docs/](http://bioinformatics.mdc-berlin.de/pigx_docs/). Regarding the specific use-cases from the manuscript, we have now also supplied additional information (e.g. download sites, experimental accession IDs. etc.) in the supplementary materials.

1. Möller S., et al., Robust Cross-Platform Workflows: How Technical and Scientific Communities Collaborate to Develop, Test and Share Best Practices for Data Analysis, <https://link.springer.com/article/10.1007%2Fs41019-017-0050-4>
2. Brett K Beaulieu-Jones & Casey S Greene, Reproducibility of computational workflows is automated using continuous analysis, 10.1038/nbt.3780
3. Di Tommaso P., Nextflow enables reproducible computational workflows, 10.1038/nbt.3820

Additional citation supplied to manuscript:

Rui Shu, Xiaohui Gu, and William Enck. 2017. A Study of Security Vulnerabilities on Docker Hub. In Proceedings of the Seventh ACM on Conference on Data and Application Security and Privacy (CODASPY '17). ACM, New York, NY, USA, 269-280. DOI: <https://doi.org/10.1145/3029806.3029832>

Reviewer #2: The authors describe a complete set of pipelines for RNA-seq, ChIP-seq, bisulfite sequencing and single cell RNA-seq. The focus of the pipelines is on ease of use and reproducibility, and they build on several existing tools: GNU guix for package installation, Snakemake for workflow execution and GNU autoconf to prepare and document the workflow system.

They then use these tools to walk through the implementations and show example analyses for the different pipelines. This is a great set of documentation and useful resource for the community.

Finally the authors describe an effort to characterize the reproducibility of the pipeline install to the level of hash-identical tools. This demonstrates that the hash-level issues

are due to timestamps and other non-deterministic parts of binary builds affecting a small fraction of the tools.

This is a great initiative and demonstrates how to build reproducible pipelines making use of existing tooling. I have a couple of suggestions to help improve the paper:

- The major new initiative here is the use of Guix for binary compatibility. How do you feel this improves reproducibility over conda packages with pinned versions? You provide `requirements.txt` files in the GitHub repositories which look to represent this approach. How did you find they compare?

Response:

We thank the reviewer, Brad Chapman, for his time and feedback. Software version strings are prescriptive in the sense that they indicate only the intent of upstream developers to distinguish the source code of one version from any other version that they have authored previously. Version strings have limited descriptive power, as they fail to provide anything beyond a short name for a set of source files, and their descriptions are susceptible to human oversight. The configuration space (e.g. flags passed to the configure script or Makefiles), the state of the build-time environment (e.g. the compiler variant used to generate the binary), and dynamic linkage information (what exact library variants were linked with the binaries) are out of scope. This is appropriate, since version strings aren't intended to fully capture this state, but then version strings alone are insufficient to describe an application. In the case of Conda, the current state of the Conda repositories remains undeclared, which precludes referential transparency (see discussion above) --although this could theoretically be approximated by maintaining a snapshot of the collection of Conda recipes and a well-defined, immutable build environment for all binaries. In practice, however, these recipes often refer to network resources; completely capturing the state of all such resources is infeasible. With Guix the complete state for all packages is encoded in the state of the Guix source repository. There are no dependencies on the state of the system performing a package build. The build environment itself is reproducible without depending on opaque binary state.

- It would be worth mentioning alternative full stack alternatives to the workflow approach you're taking. The most community driven one is Common Workflow Language plus a variety of runners. Right now this reads a bit as if you need Snakemake for the implementation, while in reality your approach with guix should work across multiple runners. What would it take in your opinion to utilize different workflow systems?

Response:

Indeed, Snakemake is not the only possible workflow framework that could be chosen for this particular set of pipelines; the choice of workflow framework is arbitrary. Snakemake was chosen primarily because it is already well-enough established, and compatible with a well-known programming language (i.e. Python). Thus, we felt the choice would be conducive to ease of use and adoption. We have added text to the manuscript to clarify the reasoning for this choice.

- Could you mention thoughts on maintainability of these pipelines over time? One of the hardest parts of building these types of integrated systems is continuing to develop and improve, which is where community engagement of existing solutions (bioconda, CWL) helps provide many hands to keep moving things forward. Do you feel that guix provides an advantage in terms of maintenance? How do you plan to support bugs and issues in previous versions as users go back to run older pipelines?

Response:

The collection of bioinformatics software in Guix has seen continued maintenance and development by people working in different institutions with a focus on bioinformatics. Although the number of regular contributors is probably smaller than the number of contributors to bioconda, it is growing and the community is actively inviting contributions and mentors newcomers, e.g. through Outreachy, GSoC, or internships at participating institutes. We are hopeful that the benefits provided by Guix will encourage more people in bioinformatics and other computationally intensive fields to

|                                                                                                                                                                                                                                                                                                                                                                                                                                                                                                                                     |                                                                                                                                                                                                                                                                                                                                                                                                                                                                                                                               |
|-------------------------------------------------------------------------------------------------------------------------------------------------------------------------------------------------------------------------------------------------------------------------------------------------------------------------------------------------------------------------------------------------------------------------------------------------------------------------------------------------------------------------------------|-------------------------------------------------------------------------------------------------------------------------------------------------------------------------------------------------------------------------------------------------------------------------------------------------------------------------------------------------------------------------------------------------------------------------------------------------------------------------------------------------------------------------------|
|                                                                                                                                                                                                                                                                                                                                                                                                                                                                                                                                     | <p>adopt this approach.</p> <p>The pipelines themselves are already being used for many collaborations within the Max Delbrueck Center. To broaden our user-base, our group also conducts regular training sessions for scientists who lack familiarity with computational bioinformatics at this institute and beyond. We encourage users of PiGx to contribute to the pipelines and share their experiences with us; to that end we have set up public source code repositories, a web site, and a public mailing list.</p> |
| <b>Additional Information:</b>                                                                                                                                                                                                                                                                                                                                                                                                                                                                                                      |                                                                                                                                                                                                                                                                                                                                                                                                                                                                                                                               |
| <b>Question</b>                                                                                                                                                                                                                                                                                                                                                                                                                                                                                                                     | <b>Response</b>                                                                                                                                                                                                                                                                                                                                                                                                                                                                                                               |
| Are you submitting this manuscript to a special series or article collection?                                                                                                                                                                                                                                                                                                                                                                                                                                                       | No                                                                                                                                                                                                                                                                                                                                                                                                                                                                                                                            |
| <p><b>Experimental design and statistics</b></p> <p>Full details of the experimental design and statistical methods used should be given in the Methods section, as detailed in our <a href="#">Minimum Standards Reporting Checklist</a>. Information essential to interpreting the data presented should be made available in the figure legends.</p> <p>Have you included all the information requested in your manuscript?</p>                                                                                                  | Yes                                                                                                                                                                                                                                                                                                                                                                                                                                                                                                                           |
| <p><b>Resources</b></p> <p>A description of all resources used, including antibodies, cell lines, animals and software tools, with enough information to allow them to be uniquely identified, should be included in the Methods section. Authors are strongly encouraged to cite <a href="#">Research Resource Identifiers</a> (RRIDs) for antibodies, model organisms and tools, where possible.</p> <p>Have you included the information requested as detailed in our <a href="#">Minimum Standards Reporting Checklist</a>?</p> | Yes                                                                                                                                                                                                                                                                                                                                                                                                                                                                                                                           |
| <p><b>Availability of data and materials</b></p> <p>All datasets and code on which the conclusions of the paper rely must be either included in your submission or deposited in <a href="#">publicly available repositories</a></p>                                                                                                                                                                                                                                                                                                 | Yes                                                                                                                                                                                                                                                                                                                                                                                                                                                                                                                           |

(where available and ethically appropriate), referencing such data using a unique identifier in the references and in the “Availability of Data and Materials” section of your manuscript.

Have you have met the above requirement as detailed in our [Minimum Standards Reporting Checklist?](#)

[Click here to view linked References](#)

# Reproducible genomics analysis pipelines with GNU Guix

Ricardo Wurmus<sup>1\*</sup>, Bora Uyar<sup>1\*</sup>, Brendan Osberg<sup>1\*</sup>, Vedran Franke<sup>1\*</sup>, Alexander Godschan<sup>1\*</sup>,  
Katarzyna Wreczycka<sup>1</sup>, Jonathan Ronen<sup>1</sup>, Altuna Akalin<sup>1#</sup>

<sup>1</sup>The Bioinformatics Platform, The Berlin Institute for Medical Systems Biology, Max-Delbrück Center for  
Molecular Medicine, Robert-Rössle-Strasse 10, 13125 Berlin, Germany

\* Equal contributions

# Corresponding author (e-mail: [altuna.akalin@mdc-berlin.de](mailto:altuna.akalin@mdc-berlin.de))

**Keywords:** Pipelines in genomics, reproducible software, functional package management,  
RNA-seq, single cell RNA-seq, ChIP-seq, Bisulfite-seq, differential expression, differential  
binding, differential methylation.



# Abstract

In bioinformatics, as well as other computationally-intensive research fields, there is a need for workflows that can reliably produce consistent output, [from known sources](#), independent of the software environment or configuration settings of the machine on which they are executed. Indeed, this is essential for controlled comparison between different observations or for the wider dissemination of workflows. Providing this type of reproducibility [and traceability](#), however, is often complicated by the need to accommodate the myriad dependencies included in a larger body of software, each of which generally come in various versions. Moreover, in many fields (bioinformatics being a prime example), these versions are subject to continual change due to rapidly evolving technologies, further complicating problems related to reproducibility. Here, we propose a principled approach for building analysis pipelines and managing their dependencies. As a case study to demonstrate the utility of our approach, we present a set of highly reproducible pipelines for the analysis of RNA-seq, CHIP-seq, Bisulfite-seq, and single-cell RNA-seq. All pipelines process raw experimental data, and generate reports containing publication-ready plots and figures, with interactive report elements and standard observables. Users may install these highly reproducible packages and apply them to their own datasets without any special computational expertise beyond the use of the command line. We hope such a toolkit will provide immediate benefit to laboratory workers wishing to process their own data sets or bioinformaticians seeking to automate all, or parts of, their analyses. In the long term, we hope our approach to reproducibility will serve as a blueprint for reproducible workflows in other areas. Our pipelines, along with their corresponding documentation and sample reports, are available at <http://bioinformatics.mdc-berlin.de/pigx>

# Introduction

Reproducibility of scientific workflows is a ubiquitous problem in science, and is particularly problematic in areas that depend heavily on computation and data analysis (see (Peng 2011)). For such work it is essential that installed software is identical to versions used in publication, and directly traceable to a well-defined set of source packages in order to facilitate the reproduction of published data and the controlled manipulation of these software systems. Unfortunately, this goal is often unattainable for a variety of related reasons: Research-oriented software may be hard to build and install due to unsatisfiable dependency constraints; non-trivial software may yield different results when built or used with different versions or variants of declared dependencies; on workstations and shared High Performance Computing (HPC) systems alike, it may be undesirable or even impossible to comply with version and variant requirements due to software deployment limitations. Moreover, It is unrealistic to expect users to manually recreate environments that match the system and binary substrate on which the software was developed. In the field of bioinformatics the above problem is exacerbated by the fact that data production technology moves extremely fast; existing software and data analysis workflows require frequent updates. Thus, it is paramount that multiple versions and variants of the same software can be automatically built, in order to ensure reproducibility of projects that are either in-progress, or are already published. Moreover, bioinformatics workflows are increasingly being applied to potentially sensitive medical data from research participants. For the sake of data security, then, it is important that researchers know exactly what sources are being used in an application in order to minimize the risk of code that might (either maliciously or inadvertently) compromise confidentiality (Shu 2017). Thus, bioinformatics represents a field where there is a need for both reproducibility, and referential transparency (i.e. traceability to original software sources).

An important related issue is the reproducibility of workflows and pipelines across different machines. In addition to bioinformatics, many scientific fields require the researcher to prototype their code on local workstations with a custom software stack, and then later run it on shared HPC clusters for large data sets. The researcher must then be able to recreate their local environment on the cluster to ensure identical behavior. All of these concerns add to the burden on scientists, and valuable time that could be spent on research is wasted accommodating the limitations of system administration practices to ensure reproducibility. Even worse, reproducibility failures can be overlooked amid this complication, and publications could be accompanied with irreproducible analysis workflows or software. For these reasons, the scientific community in general -and fast evolving fields like bioinformatics in particular- need reliable and reproducible software package management systems.

In recent years, several tools have gained popularity among software developers and system administrators for wrapping Linux kernel features to accomplish process isolation, bind mounts, and user namespaces, or to deploy services in isolated environments (also called “containers”).

1  
2  
3  
4 Examples of such tools include: Docker, Singularity, and Ixc. These tools are sometimes also  
5 proposed as solutions to the reproducibility problem (Peng 2011; Boettiger 2015), because they  
6 provide a way to ship an application alongside all of its runtime dependencies. This approach  
7 necessitates the use of file system images that are modified using imperative statements, e.g. to  
8 run a package manager inside a namespace, with the goal of embedding all dependencies in an  
9 opaque binary image.  
10  
11

12  
13 Such images, however, offer no indication as to the sources from which their contents originate.  
14 Although contributors following best practices will generally declare their dependencies, with  
15 many contributors, and inevitable human error, it can often become difficult to confidently  
16 ascertain the full contents of an opaque binary bundle. Software deployment inside of the  
17 container is still subject to the well-known limitations of traditional package managers, such as  
18 intractable stateful behavior, time-dependent installation results, the inability to install and  
19 control more than a handful of application- or library- variants of packages on the same system,  
20 to name a few. Some of these limitations can partially be worked around by following strict  
21 policies such as operating version-controlled mirrors of all upstream package repositories.  
22 However, these policies are not enforced by container systems like Docker. Rather, they only  
23 shift the problem of reproducibility from the package level to the level of binary disk images, a  
24 rather less useful level of abstraction.  
25  
26

27  
28  
29 Functional package management (Dolstra, 2004), on the other hand, embeds the complete  
30 dependency graph and configuration space into the construction of the package itself. This  
31 approach allows for referential transparency in addition to bit-for-bit build reproducibility. Other  
32 package and environment managers (such as Conda, EasyBuild, or Spack) leave out this  
33 information to varying degrees, and rely on tacit assumptions about the deployment- and build-  
34 environments.  
35  
36  
37

38  
39 For the above reasons, we propose functional package management as implemented in GNU  
40 Guix (Courtès, 2015) as a way to implement workflow systems. To demonstrate the feasibility of  
41 this approach, we created a set of analysis tools (or 'pipelines') for common genomics analysis  
42 data sets: RNA-seq, ChIP-seq, BS-seq and scRNA-seq (for the sequencing of RNA, Chromatin  
43 Immunoprecipitation, Bisulfite-treated DNA, and single-cell resolution RNA, respectively). Each  
44 pipeline has a complex and large graph of dependencies, and each graph is comprehensively  
45 declared as a GNU Guix package definition; the graph is then built reproducibly by relying on  
46 Guix package manager features. Note that these pipelines also represent production-level  
47 pipeline tools, rather than simply model examples -they come with a full set of features including  
48 alignment, quality checking control, quantification, assay specific analysis and HTML reports.  
49  
50

51 This set of pipelines is referred to, collectively, with the acronym PiGx (for Pipelines in  
52 Genomics<sup>1</sup>) --pronounced "pigs".  
53  
54  
55  
56  
57

---

58  
59 <sup>1</sup> The trailing x serves primarily as an aid to search-specificity, and denotes implementation  
60 using Guix)  
61  
62  
63  
64  
65

# Results

## Pipeline design and implementation philosophy

PiGx was designed with special focus on several key features: namely, that they be 1) easy to use, 2) easy to install, 3) easy to distribute, 4) reproducible and 5) referentially transparent, many of which are inter-related constraints. Care was taken to ensure that all of the pipelines have a similar interface, so that familiarity with one pipeline would make for a gentler learning curve in using the others. For the end-user, each pipeline has the same input types: a sample sheet and a settings file. The sample sheet contains information about samples (such as names, labels, covariates etc.) The settings file contains extra arguments related to the execution of the pipelines. The users can generally run pipelines as follows:

```
pigx [pipeline_name] [sample_sheet] -s [settings_file]
```

where [pipeline\_name] can refer to any of the four pipelines: “rnaseq”, “chipseq”, “bsseq”, or “scrnaseq”. The resulting output provided to the users includes high quality reports and figures containing a standard set of results from basic analyses and data quality checks. Where appropriate, reports also contain certain interactive elements.

In implementing this toolset, one of our first design choices was to use a conventional build system, the GNU Autotools suite, to configure and build the pipelines as if they were first-class software packages in their own right rather than a mere collection of tools and “glue code”. Instead of assuming that a user will provide a suitable environment *at runtime*, the use of a build system allows us to capture the software environment *at configuration time*. This is achieved by explicitly checking for the presence of required tools in the build environment and recording their exact location in the pipeline's configuration file. At runtime, the pipeline refers only to tools through the configuration file and does not assume the availability of dependent software in the global environment. Moreover, using a well-established build system makes it easy to package the pipelines for any package manager. We chose GNU Autotools over other build systems for two reasons: it does not require users to have a copy of the build system software as it compiles to shell code (which is highly portable), and it has been established long enough to implement a conventional and flexible build interface with well-known behavior even in somewhat unusual circumstances, such as the installation of files into unique prefixes as is done when building with GNU Guix.

Capturing the build-time environment alone is not enough to ensure reproducibility, nor is the use of a build system sufficient to make installation easy. Thus, our second design choice was to package the pipelines for the GNU Guix package manager. Like other user-level package managers such as Conda or EasyBuild, GNU Guix allows users to install, upgrade and remove software without having to know the details of dependencies or the build procedure. Unlike traditional package managers, however, GNU Guix takes a declarative approach to software

1  
2  
3  
4 environments called functional package management. This approach takes into account the  
5 complete graph of dependencies and build-time configurations, and maximizes build  
6 reproducibility by building binaries in isolated environments. Packages are installed into  
7 directories with unique prefixes that are computed from the dependency graph, allowing for the  
8 simultaneous installation of different versions or variants of applications and libraries. With  
9 functional package management, a given software build will generally yield bit-identical files  
10 when the build is performed on different machines or on the same machine at different points in  
11 time, independent of the current state of the system (caveats to this generalization are  
12 discussed below).  
13  
14  
15  
16

17 We consider software reproducibility an important asset in controlled experimentation.  
18 Reproducing a software environment bit for bit is not a goal in itself, but it provides us with a  
19 foundation upon which we can perform precise changes to the environment and assess the  
20 impact of these changes. Without bit-for-bit reproducibility we cannot be certain of the nature  
21 and impact of differences in the software environment. While virtual machines or binary  
22 application bundles such as Docker images would be sufficient to freeze the state of our  
23 software environment, relying on these tools would forgo the ability to recreate that same  
24 environment from scratch; nor would it be possible to analyze the environment at the level of  
25 software packages. The approach of functional package management as implemented in GNU  
26 Guix preserves the relationships between software packages and ensures that differences to  
27 the environment can be accounted for.  
28  
29  
30  
31  
32

33 A further design choice remained regarding the workflow management system, which would  
34 execute a series of tasks mostly in the form of scripts from different programming languages.  
35 For this purpose, we used SnakeMake (Köster and Rahmann 2012), which provides  
36 target-driven execution infrastructure similar to GNU Make but with Python syntax, along with  
37 useful features such as parallel execution on HPC scheduling systems. We would like to  
38 emphasize, however, that this choice of workflow management system was made purely to  
39 facilitate ease of development and acceptance within the bioinformatics community, where the  
40 Python programming language is well-established. The different pipeline stages are  
41 implemented with a workflow management system stitching together various bioinformatics  
42 tools; they are made configurable with the GNU Autotools and packaged with GNU Guix. This  
43 means they will be almost fully (see below) build-reproducible and can be installed via the  
44 one-liner:  
45  
46  
47  
48

```
49 guix package --install pigx.  
50  
51  
52  
53  
54
```

## 55 **RNA-seq pipeline**

### 58 **General Description of PiGx-RNA-seq Pipeline**

59  
60  
61  
62  
63  
64  
65

1  
2  
3  
4 PiGx RNA-seq provides an end-to-end preprocessing and analysis pipeline for RNA-seq  
5 experiments. The pipeline takes a set of raw fastq read files and the experimental design as  
6 described by the user, and produces differential expression reports with figures and tables of  
7 differentially expressed genes, as well as gene ontology (GO) term analysis thereof.  
8 Furthermore, it provides quality control reports about the experiment. To use the pipeline, the  
9 user must provide two files: the sample sheet describing the samples and corresponding fastq  
10 files, and a settings file with configuration parameters related to the pipeline's execution. The  
11 settings file lists, among other things, the location of a reference genome for alignment, a GTF  
12 file with genome annotations, and a transcriptome reference, as well as a list of desired  
13 differential expression analyses to be performed, specifying which samples to use as cases and  
14 controls --see package documentation here  
15 [http://bioinformatics.mdc-berlin.de/pigx\\_docs/pigx-rna-seq.html](http://bioinformatics.mdc-berlin.de/pigx_docs/pigx-rna-seq.html) for more details.  
16  
17  
18  
19  
20

21 The pipeline can then be run with the command

22  `pigx rnaseq [sample_sheet] -s [settings_file]`, to generate the output  
23 through several intermediate steps (see [figure 1](#)).  
24  
25

26 PiGx RNA-seq uses the reference genome and transcriptome provided by the user to produce  
27 indices using *STAR* (Dobin et al. 2013) and *Salmon* (Patro et al. 2017) respectively. It then uses  
28 *Trim Galore!* (Babraham 2018b) to trim low quality reads and remove adapter sequences before  
29 aligning the reads to the reference using *STAR*. At this point, PiGx RNA-seq uses *fastqc*  
30 (*Babraham 2018a*) and *MultiQC* (Ewels et al. 2016) to generate comprehensive quality control  
31 reports of the sequencing, trimming, and alignment steps. PiGx RNA-seq also uses *BEDTools*  
32 (*Quinlan and Hall 2010*) to compute the depth of coverage in the experiment and outputs  
33 convenient bedgraph files. Gene expression quantification is obtained from *STAR*, and  
34 transcript level quantification using *Salmon*. The gene expression count matrix is then used to  
35 run differential expression analyses as specified by the user, using *DESeq2* (Love, Huber, and  
36 Anders 2014) for statistical analysis and *g:ProfileR* (Reimand et al. 2007) for GO term analysis.  
37 Each differential expression analysis produces a self-contained HTML report.  
38  
39  
40  
41  
42  
43

44 The differential expression reports produced are comprehensive, including sortable tables for  
45 differentially expressed genes for a detailed view, principal component analysis plots for a  
46 birds-eye view of the experiment, as well as MA and volcano plots. In addition, the reports  
47 include a section with GO term enrichment analysis.  
48  
49  
50  
51  
52  
53  
54  
55  
56  
57  
58  
59  
60  
61  
62  
63  
64  
65

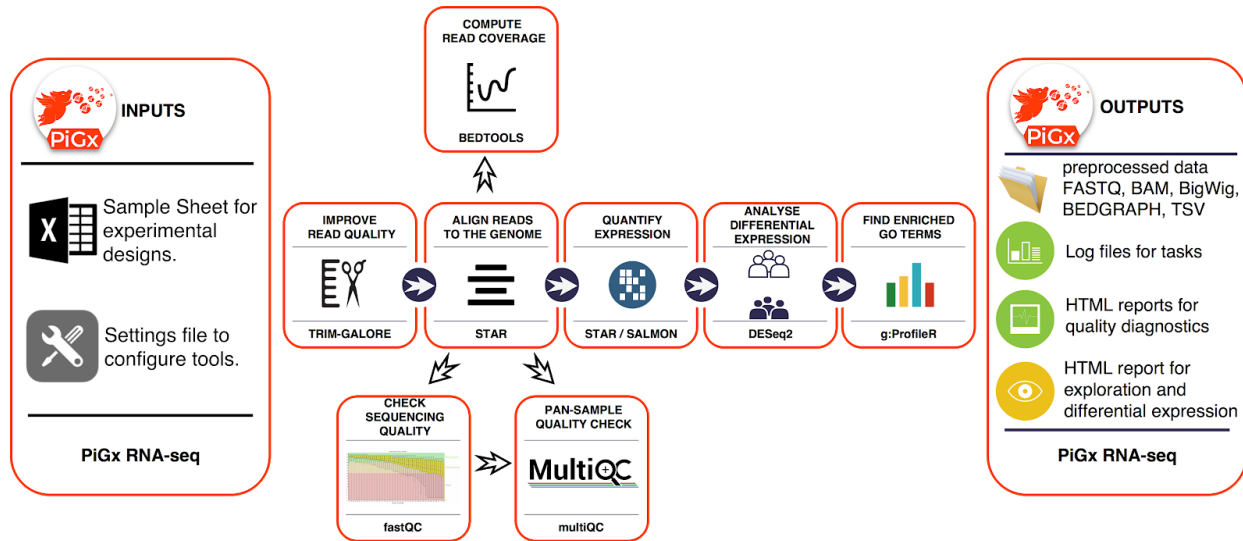

Figure 1  
Workflow diagram of the PiGx-RNA-seq pipeline.

## RNA-seq Use Case

The study by Hon *et al.* (2014) is motivated by several observations: DNA methyl-transferases (DNMTs) are the major mediators of cytosine methylation (producing 5-methyl-cytosine). 5hmC (5-hydroxy-methyl-cytosine) is a product of oxidation of 5mC's, and the TET family of proteins mediate 5mC oxidation. It has been established that DNA demethylation consists of the sequence of chemical reactions that convert 5mC into 5hmC, which is subsequently converted into 5fC (5-formyl-cytosine) and 5caC (5-carboxyl-cytosine). Active enhancers are depleted for 5mC but are enriched for 5hmC marks (Rampal *et al.* 2014), suggesting that an interplay between DNMTs and TET proteins could determine the activity level of enhancers. Mutating DNMTs or TET proteins in mouse embryonic stem cells (mESCs) perturbs global DNA methylation status, however cells do not lose the ability to regenerate. Moreover, mutating TET proteins and perturbing the oxidation levels have previously been shown to skew the differentiation of mESCs. Based on these facts, the authors address the following question: Can the skewed differentiation in mESCs be explained by deregulated balance of 5mC / 5hmC levels at active enhancers following the loss of activity of TET proteins?

The authors of the above study use TAB-Seq, Bisulfite-Seq, ChIP-seq and RNA-seq methods to profile genome-wide methylation, demethylation, histone modifications and gene expression levels to address these questions. They find that *Tet2* has the biggest role in enhancer demethylation in mESCs. Deletion of *Tet2* leads to enhancer hypermethylation, which in turn reduces enhancer activity. The reduced enhancer activity leads to a disruption in the activation of more than 300 genes in the early stages of differentiation, however the activity levels of these



genes are restored to wild-type levels at the later stages of differentiation. Reduced enhancer activity followed by delayed gene activation explains the skew observed in mESC differentiation.

The authors of the above study profile the transcriptomes of mESCs as they differentiate into neural progenitor cells (NPCs) within a six day period. They quantify gene expression levels of wild-type, *Tet1* *-/-* and *Tet2* *-/-* cells on day zero, day three, and day six and sequenced two biological replicates per sample. Thus, they obtained 18 samples in total (3 genotypes x 2 replicates x 3 days). In figure 5 of the original manuscript, the authors summarise the results of the RNA-seq analysis. Here, we use the PiGx-RNA-seq pipeline to pre-process the raw fastq files downloaded from the GEO archive (GEO accession: GSE48519), map the reads to the *Mus musculus* genome (GRCM38 (mm10) build), and finally quantify the expression levels of genes using both Salmon (Patro et al. 2017) and STAR (Dobin et al. 2013). We then use DESeq2 (Love, Huber, and Anders 2014) to perform multiple differential expression analyses as described in the original publication. Based on the processed and normalized count tables and differential expression analysis results produced by the PiGx pipeline, we have written a small custom script to reproduce the panels in figure 5 of Hon *et al.* In order to reproduce this figure, we needed to perform seven differential expression analyses as described in Table 1. HTML reports for each differential expression analysis (based on read counts computing using STAR) can be found here: <http://bioinformatics.mdc-berlin.de/pigx/supplementary-materials.html>.

| Analysis        | Case Sample  | Control Sample | Description                                                                                  |
|-----------------|--------------|----------------|----------------------------------------------------------------------------------------------|
| tet2_diff_day3  | day3_tet2_KO | day0_tet2_KO   | <i>Tet2</i> <i>-/-</i> cells on day 3 are compared to <i>Tet2</i> <i>-/-</i> cells on day 0. |
| tet2_diff_day6  | day6_tet2_KO | day0_tet2_KO   | <i>Tet2</i> <i>-/-</i> cells on day 6 are compared to <i>Tet2</i> <i>-/-</i> cells on day 0. |
| WT_diff_day3    | day3_WT      | day0_WT        | Wild-type cells on day 3 are compared to wild-type cells on day 0.                           |
| WT_diff_day6    | day6_WT      | day0_WT        | Wild-type cells on day 6 are compared to wild-type cells on day 0.                           |
| tet2_vs_WT_day0 | day0_tet2_KO | day0_WT        | <i>Tet2</i> <i>-/-</i> cells on day 0 are compared to wild-type cells on day 0.              |
| tet2_vs_WT_day3 | day3_tet2_KO | day3_WT        | <i>Tet2</i> <i>-/-</i> cells on day 3 are compared to wild-type cells on day 3.              |
| tet2_vs_WT_day6 | day6_tet2_KO | day6_WT        | <i>Tet2</i> <i>-/-</i> cells on day 6 are compared to wild-type cells on                     |



1  
2  
3  
4  
5  
6  
7  
8  
9  
10  
11  
12  
13  
14  
15  
16  
17  
18  
19  
20  
21  
22  
23  
24  
25  
26  
27  
28  
29  
30  
31  
32  
33  
34  
35  
36  
37  
38  
39  
40  
41  
42  
43  
44  
45  
46  
47  
48  
49  
50  
51  
52  
53  
54  
55  
56  
57  
58  
59  
60  
61  
62  
63  
64  
65

|  |  |  |        |
|--|--|--|--------|
|  |  |  | day 6. |
|--|--|--|--------|

Table 1

Differential expression analyses performed by PiGx-RNA-seq.

Having performed the above analysis, we first took a global look at how all sequenced samples cluster. Using a table of TPM (transcripts per million reads) counts generated by Salmon at the gene level, we selected the top 100 most variable genes and plotted a heatmap of all the samples using pheatmap package (Kolde 2018). We observed that the samples mainly cluster by the differentiation stage rather than genotype, which confirms the authors' findings (figure 2A). Next, again using the same TPM counts table, we plotted the expression levels of a select list of genes (*Nes6*, *Pax6*, *Sox1*, *Tet1*, *Tet2*, *Tet3*, *Slit3*, *Lmo4*, *Irx3*) on day 0, day 3, and day 6 (figure 2B). The changes in the expression levels of these genes perfectly match the patterns as described by Hon et al. At this point the authors recognise that some neural marker genes such as *slit3* and *lmo4* show discordant expression patterns between WT and *Tet2* *-/-* samples particularly on day 3, which are restored back to WT levels on day 6. The authors then investigated whether such a delayed induction mechanism can be observed globally. It was shown that the percentage of genes that are differentially expressed in both *Tet2* *-/-* and WT cells (compared to the undifferentiated samples of the corresponding genotypes on day 0), is significantly higher on day 6 than on day 3. We also observe a similar pattern, however the difference we observe is somewhat reduced. Our findings are reproduced based on gene counts quantified by both STAR and Salmon (figure 2C).

In figure 5F of the original publication, the authors take a closer look into the list of discordantly induced genes on day 3 in *Tet2* *-/-* samples. There it is shown that the majority of the genes that get induced in WT samples by day 3, don't get induced in the *Tet2* *-/-* samples as highly as they do in the WT samples. On the other hand, these numbers are comparable on day 6. We also observe the same difference and reproduce the findings using both Salmon and STAR-based gene counts (figure 2D). This suggests that there must be a list of genes that get activated in WT, but lag behind in *Tet2* *-/-* samples at the early stage of differentiation, however they catch up later with the WT levels. The authors call these genes '*delayed induction genes*' and find 333 genes that fit such a description. In figure 5G, the authors show the relative expression of these genes in *Tet2* *-/-* samples compared to WT samples throughout differentiation and compare it to the remaining list of genes in the genome. We have successfully reproduced the same patterns based on 357 delayed induction genes detected by Salmon-based gene counts (282 genes detected by STAR-based gene counts) (Figure 2E). In figure 5H, the authors show the most significant GO terms enriched for the delayed induction genes. Although we don't observe the same set of terms as reported by the authors, we found seven development-related GO terms including 'tissue development' and 'nervous system development' as enriched terms (figure 2F).

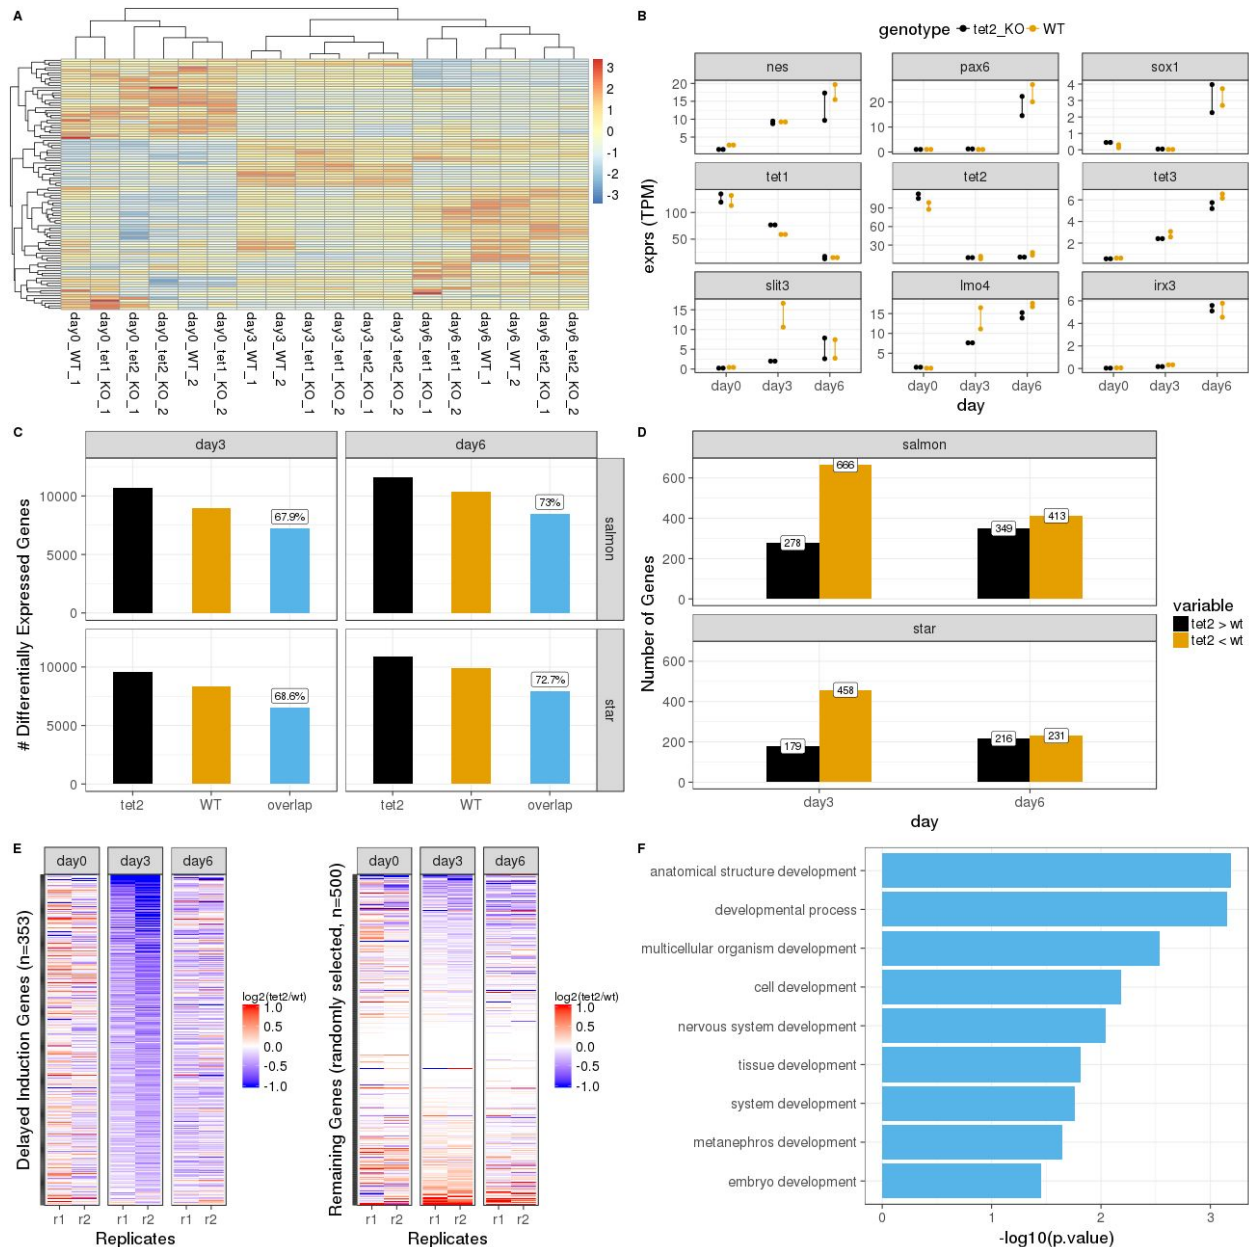

Figure 2

Reproduction of figure 5 from (Hon et al. 2014) using datasets processed by PiGx-RNA-seq pipeline. **A)** Hierarchically clustered heatmap of the top 100 most variable genes across all samples (transcripts per million (TPM) aggregated on the gene level, produced with Salmon). Each row represents a gene and each column represents a sequenced sample (See Table 1 for descriptions of the samples). The expression values are scaled by 'row'. **B)** Changes in the expression levels of a selected list of genes throughout differentiation period on day 0, day 3, and day 6. The y-axis shows the normalised expression levels (TPM at gene-level). The expression patterns of samples with *Tet2*  $-/-$  background are depicted in black and wild type background in orange. **C)** Abundance of differentially expressed genes (adjusted p-value < 0.1)

1  
2  
3  
4 (on y-axis) when comparing samples on day 3 or day 6 with the samples on day 0 with  
5 corresponding genotypes (*Tet2* *-/-* or wild-type). The bar labeled 'overlap' represents the number  
6 of differentially expressed genes in both genotypes. The percentage is calculated by dividing the  
7 value of 'overlap' with the value of *Tet2* . The results are reproduced by both Salmon-based  
8 gene-level read counts (top row) and STAR-based gene-level read counts (bottom row). **D)**  
9 Genes that are up-regulated (induced) in wild-type samples on day 3 (or day 6) compared to  
10 wild-type samples on day 0, are intersected with genes that are differentially expressed between  
11 wild-type samples and *Tet2* *-/-* samples at the same stage of differentiation, and classified as  
12 '*Tet2* > wt' (the gene is up-regulated in the *Tet2* *-/-* sample more so than in the wild-type sample)  
13 or '*Tet2* < wt' (the gene is upregulated in *Tet2* *-/-* sample less than in the wild-type sample). The  
14 plot is reproduced using both Salmon-based gene counts and STAR-based gene counts. **E)**  
15 Heatmaps for delayed induction genes (on the left) and 500 genes randomly selected from the  
16 remainder (on the right). The colors of the heatmap represent the  $\log_2$  scale ratio of normalised  
17 expression value (gene-level TPM counts obtained using Salmon) of each delayed induction  
18 gene between *Tet2* *-/-* sample and the wild-type sample of the corresponding replicates (r1:  
19 replicate-1, r2: replicate-2) on the corresponding stages of differentiation (day 0, day 3, and day  
20 6). The rows of the heatmap are ordered in increasing order based on the average values of the  
21 two replicates on day 3. The color scales range between -1 and 1 before reaching saturation. **F)**  
22 Top GO terms for biological processes (on the y-axis) enriched among the delayed induction  
23 genes. The GO terms are detected using g:ProfileR tool (Reimand 2016). The resulting terms  
24 are filtered for p-value<0.05 and further filtered for the keyword 'development'. On the x-axis, the  
25 p-values are depicted at  $\log_{10}$  scale.  
26  
27  
28  
29  
30  
31  
32  
33  
34  
35  
36  
37

## 38 ChIP-seq pipeline

### 39 General Description of PiGx-ChIP-seq Pipeline

40  
41  
42  
43  
44 PiGx ChIP-seq is an end-to-end processing and analysis pipeline for ChIP-seq experiments.  
45 From the input fastq files, the pipeline produces sequencing quality control, ChIP quality control,  
46 peak calling, and IDR (Q. Li *et al.* 2011) estimation. PiGx ChIP-seq also prepares the data for  
47 visualization in a genome browser. The pipeline execution is highly customizable - the user can  
48 specify which parts of the pipeline to execute, and which parameter settings to use. As in the  
49 other pipelines, to use PiGx ChIP-seq, the user must provide two files: a sample sheet  
50 containing the names of the fastq files with a descriptive label, and a settings file. The settings  
51 file contains the locations of the reference genome, and the GTF file with genome annotations,  
52 as well as a list of configurations for each executable step. Upon completion, the user is  
53 provided with quality reports, and all of the pre-processed data, which substantially facilitates  
54 downstream analysis and visualization.  
55  
56  
57  
58  
59  
60  
61  
62  
63  
64  
65

The pipeline can then be run with the command:

```
pigx chipseq [sample_sheet] -s [settings_file]
```

PiGx ChIP-seq pipeline aligns the reads to the genome using *Bowtie2* (Langmead and Salzberg 2012), does peak calling using *MACS2* (Zhang et al. 2008), calculates the irreproducibility rate and outputs a series of quality statistics, such as: GC content, strand cross correlation, distribution of reads and peaks over annotated genomic features, and clustering of samples based on their similarity (Landt et al. 2012). The pipeline also produces UCSC Track hubs to facilitate exploration of the dataset. The purpose of the pipeline is to improve the routine processing steps for ChIP-seq experiments and enable the user to focus on data quality control and biologically relevant data exploration. The pipeline heavily depends on Bioconductor (Huber et al. 2015) packages such as GenomicRanges (Lawrence et al. 2013) and Genomation (Akalin et al. 2015) for annotating peaks and summarizing ChIP-seq scores over regions of interest.

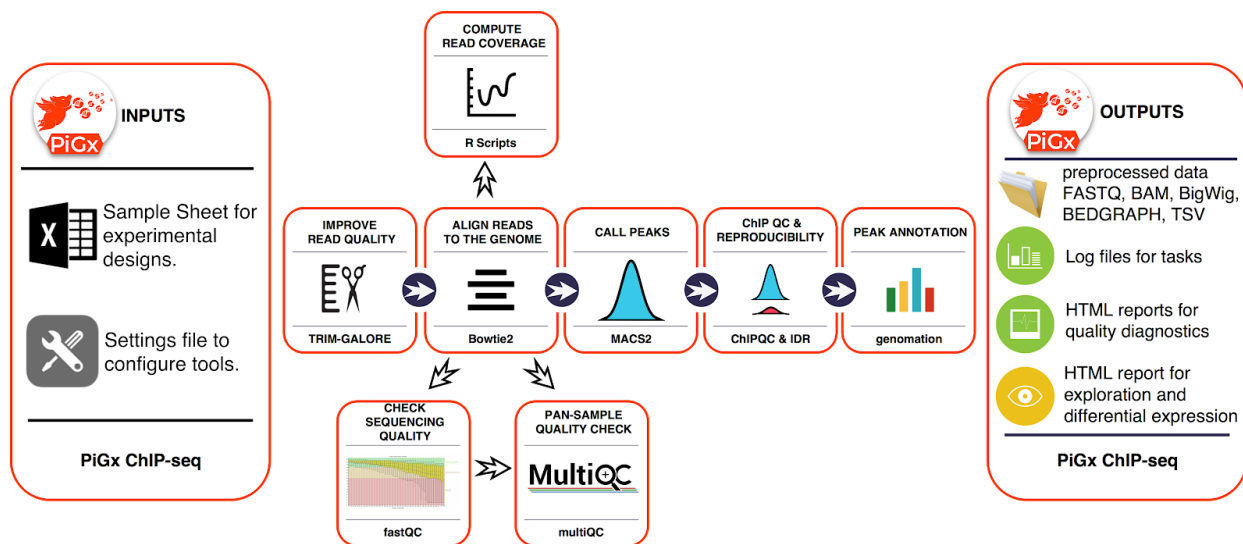

Figure 3

Workflow diagram for ChIP-seq pipeline

## ChIP-seq Use Case

For consistency, we applied the ChIP-seq pipeline to data from the same study as in the section “RNA-seq Use Case” above (Hon et al. 2014); for the biological underpinnings of this experiment, please see the description provided there. Figure 4 shows part of the ChIP-seq quality control output performed on untreated, wild type ChIP samples, of various activating and repressing histone marks, and the corresponding input samples. One standard procedure is to validate the consistency of results with known biological priors, in order to quickly find samples with outlying properties, and to discover batch effects. For example, figure 4A shows the

1  
2  
3  
4 expected clustering of repressive (H3k27me3, H3k9me3) and activating (H3k4me3, H3k4me1,  
5 H3k27ac, and H4k36ac) histone marks. Upon closer inspection, however, it becomes clear that  
6 the activating histone marks cluster by their corresponding *batches*, and not by their biological  
7 functionality.  
8  
9

10  
11 Figure 4B shows the cross-correlation between the signal on the plus and minus genomic  
12 strands, shifted by a defined range (usually within a range of 1 - 400 nucleotides). The  
13 maximum intensity in each row indicates the average DNA fragment size in each corresponding  
14 ChIP experiment. Large discrepancies in the cross correlation profile, between experiments, can  
15 indicate problems with fragmentation, fixation, or chromatin immunoprecipitation. The figure  
16 shows that most of the samples have an average fragment size between 100 - 150 bp. One of  
17 the H3k27me3 replicates, however, shows an aberrant fragment size profile (second sample in  
18 the plot). Upon visual inspection, the sample had an extremely low signal to noise ratio and the  
19 peak calling resulted in zero enriched regions. Such samples should either be repeated or  
20 omitted from the downstream analysis.  
21  
22  
23  
24

25  
26 Figure 4C represents the relationship between the GC content of one kilobase genomic bins  
27 and the ChIP signal; this plot is used as a diagnostics tool for enrichment of fragments with  
28 extreme nucleotide content (enrichment of fragments with GC content strongly deviating from  
29 the genomic mean), which can indicate problems with PCR-based fragment amplification, and  
30 chromatin immunoprecipitation.  
31  
32

33  
34 Figure 4D represents the distribution of reads over functional genomic features. It is used to  
35 observe whether the experimental results conform to known expectations, based on previous  
36 experiments - i.e. H3k4me3 should show strong enrichment over transcription start sites, while  
37 the H3k36me3 should show an enrichment over exonic and intronic regions. Deviating results  
38 can indicate a weak precipitation of the targeted protein, or antibody cross-reactivity with  
39 unexpected epitopes. Figure 4 represents just a subset of quality control metrics implemented  
40 as a standard output from the PiGx ChIP-seq pipeline. The full set can be found here:  
41 <https://bioinformatics.mdc-berlin.de/pigx/supplementary-materials.html>  
42  
43  
44  
45  
46  
47  
48  
49  
50  
51  
52  
53  
54  
55  
56  
57  
58  
59  
60  
61  
62  
63  
64  
65

1  
2  
3  
4  
5  
6  
7  
8  
9  
10  
11  
12  
13  
14  
15  
16  
17  
18  
19  
20  
21  
22  
23  
24  
25  
26  
27  
28  
29  
30  
31  
32  
33  
34  
35  
36  
37  
38  
39  
40  
41  
42  
43  
44  
45  
46  
47  
48  
49  
50  
51  
52  
53  
54  
55  
56  
57  
58  
59  
60  
61  
62  
63  
64  
65

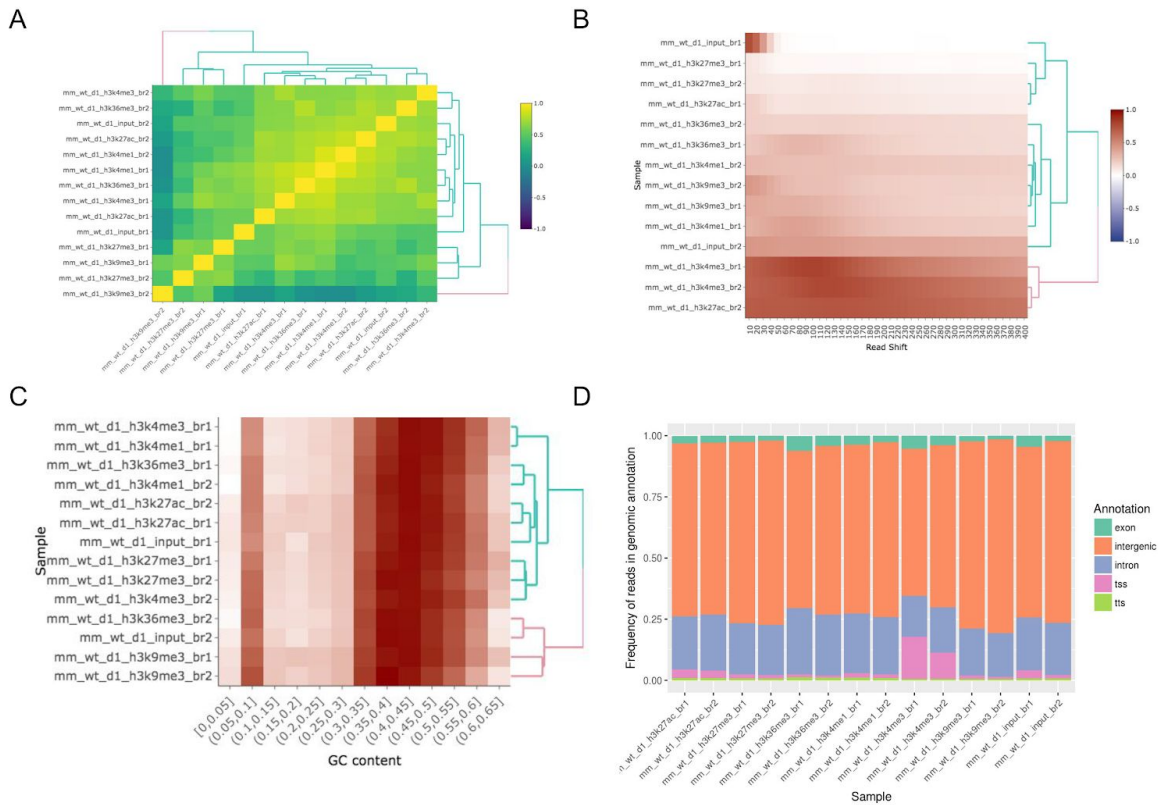

Figure 4

Example ChIP-seq quality control output. **A)** Clustering of samples based on correlation of normalized ChIP reads in one kilobase bins. **B)** Cross correlation between coverage profiles on Watson and Crick strands, shifted by the amount specified on the x axis. **C)** Relationship between read count and GC content in 1 kb bins. **D)** Distribution of reads in functional genomic features.

## BS-seq pipeline

### General description of the PiGx BS-seq pipeline

PiGx BS-seq is a bisulfite sequencing processing pipeline used to detect genome-wide methylation patterns and to perform differential methylation calling for case-control settings. It produces individual reports for each sample provided by the user, in addition to differential-methylation reports for arbitrarily many pairs of treatment conditions provided by the user. PiGx BS-seq uses *Trim Galore!* (Babraham 2018b) to trim reads for adapter sequences and quality, and *fastqc* (Babraham 2018a) for quality control (both before and after trimming). If necessary, PiGx BS-seq produces GA- and CT- converted versions of the reference genome for



alignment, using bismark\_genome\_preparation (Krueger and Andrews 2011). Reads are then mapped to the reference using Bowtie2 (Langmead and Salzberg 2012), before being sorted by location in the genome and filtered for uniqueness using samtools (Krueger and Andrews 2011; H. Li *et al.* 2009). The corresponding reports and .bam files for each of these steps are saved to their respective directories.

As in the other pipelines, to use PiGx BS-seq, the user must provide two input files: a sample sheet containing the paths to the fastq files with a descriptive label, and a settings file. The pipeline is robust to paired-end or single-end input data, and processing of each case is initiated automatically, based on whether the user supplies only a single input file, or a pair of files, for a given sample. The settings file contains the locations of the reference genome, among other directories, as well as a list of configuration steps for each executable step. The pipeline can then be run with the command:

```

pigx bsseq [sample_sheet] -s [settings_file]

```

Post-mapping analysis steps performed automatically by PiGx BS-seq include tabulation of the fractional methylation of CpG sites, the segmentation of genomic methylation patterns across the genome, and the selection of differentially methylated sites between pairs of treatments provided in the settings file above. Furthermore, the final reports include genomic annotation of differentially methylated regions and methylome segments. A single execution of the pipeline can perform differential methylation analysis between a sample and arbitrarily many references; each comparison will have its own dedicated report, in addition to the final report for the sample itself. For traceability, direct links to input files, and various execution tools are saved directly within the output folder. Finally, a copy of the full methylome for each sample is also saved in BigWig (.bw) format, compatible with visualization in an online genome browser.

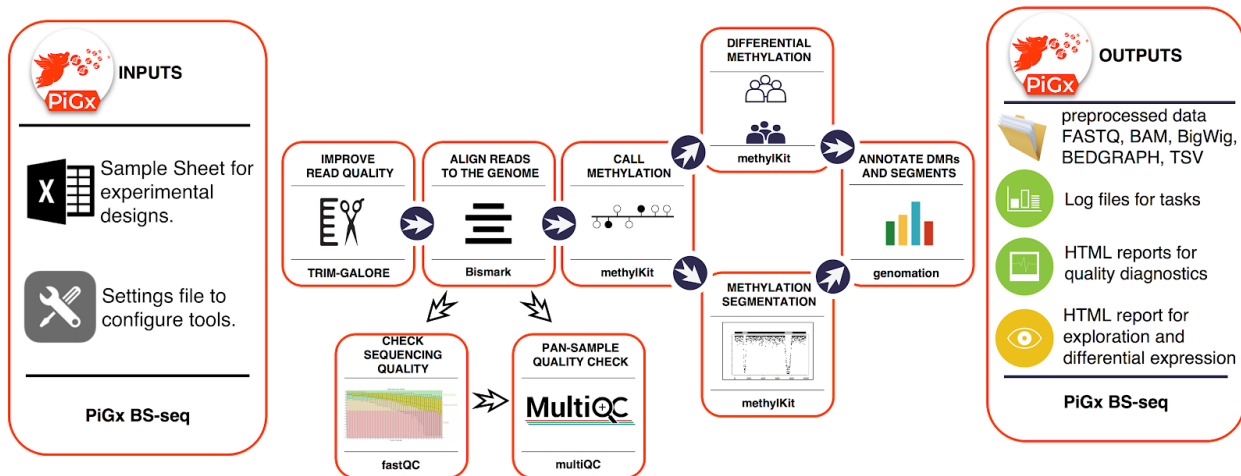

Figure 5  
Workflow diagram for PiGX BS-seq pipeline

## BS-seq Use Case

We applied the BS-seq pipeline to data from embryonic stem cells in mice, comparing wild type and *Tet2* deletion experiments (accessions SRX317877, and SRX317883 respectively). These data sets derive from the same study as was used for controlled comparison in the section “RNA-seq Use Case” above (Hon *et al.* 2014); for a biological description of this experiment, please refer to that section. HTML reports for each of the performed analyses can be found here: <https://bioinformatics.mdc-berlin.de/pigx/supplementary-materials.html>

Figure 6 shows a standard set of data analysis metrics generated automatically by the pipeline. For example, methylation levels near the promoter region of a list of annotated genes for each sample are shown in figures (A) and (B). For generality, figure 6 averages over all known genes, however the user may freely probe for more specific results by supplying any arbitrary set of genes under investigation (in the absence of such an annotation file, this figure is simply omitted from the final report). A coarse map of the genome is provided in (C), which, for some datasets, may serve to highlight differential methylation localized to particular regions or chromosomes. In this particular use-case it is more useful as a null control showing that these regions are uniformly distributed throughout the genome. In addition, a histogram for differential methylation status of CpGs throughout the genome is provided in (D) using the same colour-code as in (C). The methylation differences of hyper-methylated, hypo-methylated and non-differentially methylated CpGs are shown as histograms with the color-code as in Figure 6C. The latter is shown as a distribution of methylation differences deemed to be not statistically significant (in black), and since these are generally far more numerous than the former, the two curves are normalized independently. Note also that since these curves represent *relative* distributions, the vertical axis is of arbitrary units and tick marks are omitted. Finally, a screenshot of data-visualization from the genome browser (Robinson *et al.* 2011; Thorvaldsdóttir, Robinson, and Mesirov 2013) is provided in (E); here, regions of interest can be inspected manually at arbitrary precision.



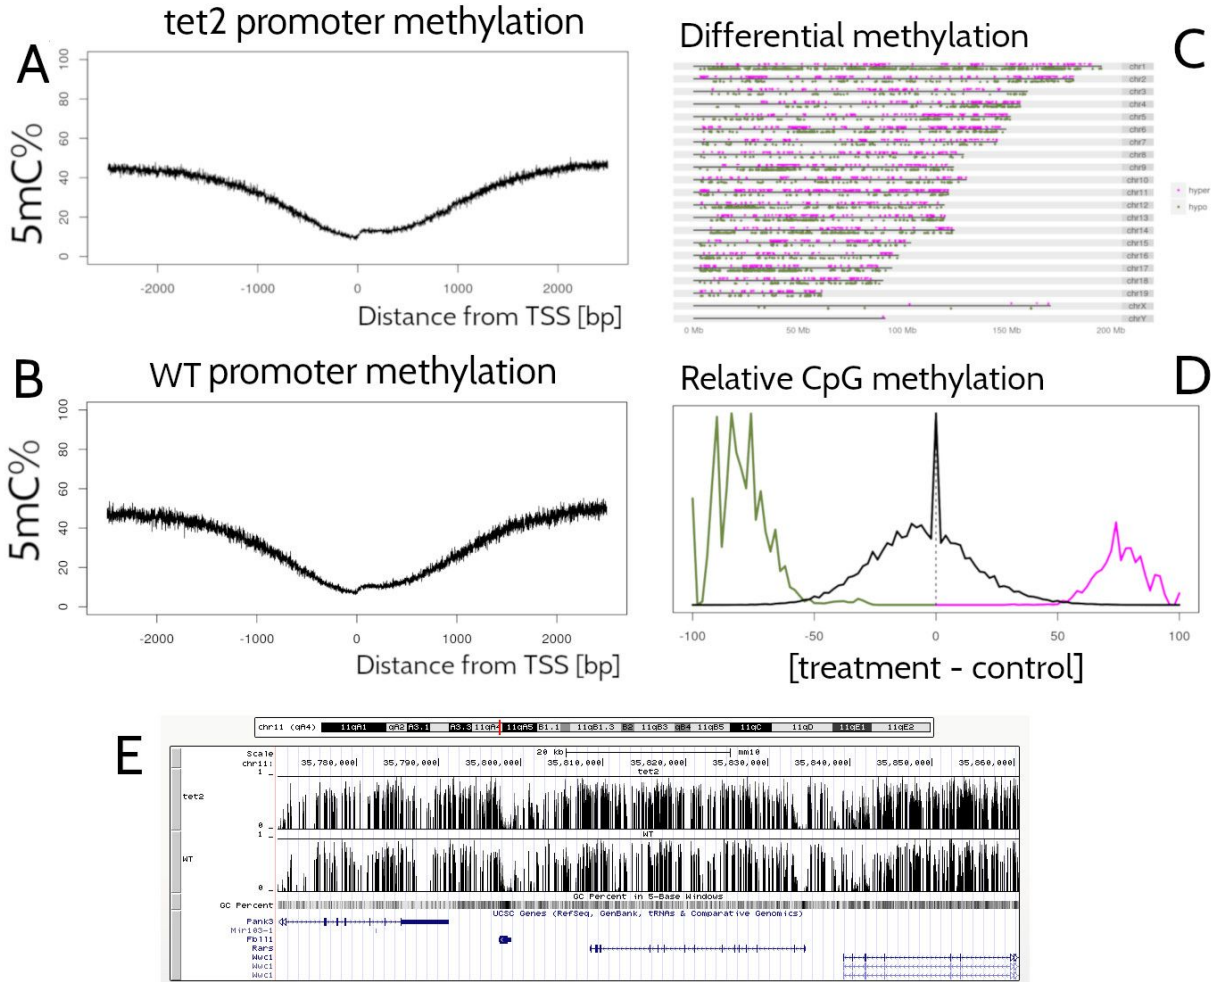

Figure 6

Output from the PiGx BS-seq pipeline. **(A,B)**: average CpG methylation throughout the promoter regions of the mm10 genome for *Tet2*<sup>-/-</sup> and WT, respectively, as a function of distance from TSS (in direction of transcription). **(C)** Whole-genome map of differentially methylated CpGs, with colour-code to indicate hyper- and hypo- methylation of the treatment (*Tet2*<sup>-/-</sup>) relative to the control (Wild-type). **(D)** Histogram of the difference in average CpG methylation between *Tet2*<sup>-/-</sup> and wild-type. For differentially-methylated cytosines, colors are consistent with (C), while CpGs with statistically insignificant difference in methylation are provided in black. Normalization of these two curves is performed independently (since the latter are generally far more numerous than the former), and the graph conveys only relative proportions (thus, as the absolute y-axis is of arbitrary scale, units are omitted). **(E)** Screenshot of the genome browser using bigwig data from PiGx; here the data can be examined in much finer detail than in (C).

# scRNA-seq pipeline

## General description of the PiGx scRNA-seq pipeline

Single cell RNA-seq is an extremely powerful technology, that is becoming increasingly prevalent in biological studies. The rapid development of UMI based methods, along with droplet based cell separation (Macosko et al. 2015; Klein et al. 2015), has enabled even simple experiments to quantify expression in several tens of thousand of cells. **PiGx scRNA-seq** is a pipeline for pre-processing of UMI based single-cell experiments. The purpose of the pipeline is to enable seamless integration and quality control of multiple single cell data sets. The pipeline works with minimal user input. As in the other pipelines, the user must provide a sample sheet with a basic experimental description, and a settings file which defines, among other parameters, the location of the input data and reference sequence and annotation. The pipeline can then be run with the command:

```
pigx scrnaseq [sample_sheet] -s [settings_file]
```

The pipeline does preliminary read processing, maps the reads with the STAR (Dobin et al. 2013) aligner, and assigns reads to gene models. It also separates cells from background barcodes (Alles et al. 2017), and constructs digital expression matrices for each sample (each saved in loom format); loom files from all samples are then merged into one large loom file using the loompy package (Linnarsson 2018). The expression data are subsequently processed into a SingleCellExperiment (Aaron Lun and Risso 2018) object. SingleCellExperiment is a Bioconductor class for storing expression values, along with the cell, and gene data, and experimental meta data in a single container. It is constructed on top of hdf5 file based arrays (Pagès 2018), which enables exploration even on systems with limited RAM (random access memory).

During the object construction, the pipeline performs expression normalization, dimensionality reduction, and identification of significantly variable genes. The pipeline then classifies cells by cell cycle phase and calculates the quality statistics. The SingleCellExperiment object contains all of the necessary data needed for further exploration. The object connects the PiGx pipeline with the Bioconductor single cell computing environment, and enables integration with state of the art statistical, and machine learning methods (scrn (A. T. L. Lun, McCarthy, and Marioni 2016), zinbwave (Risso et al. 2018), netSmooth (Ronen and Akalin 2018), iSEE (Aaran Lun et al. 2018), etc.).

The pipeline produces an HTML report containing quality controls, labeled by input covariates, which can be used for detecting batch effects.

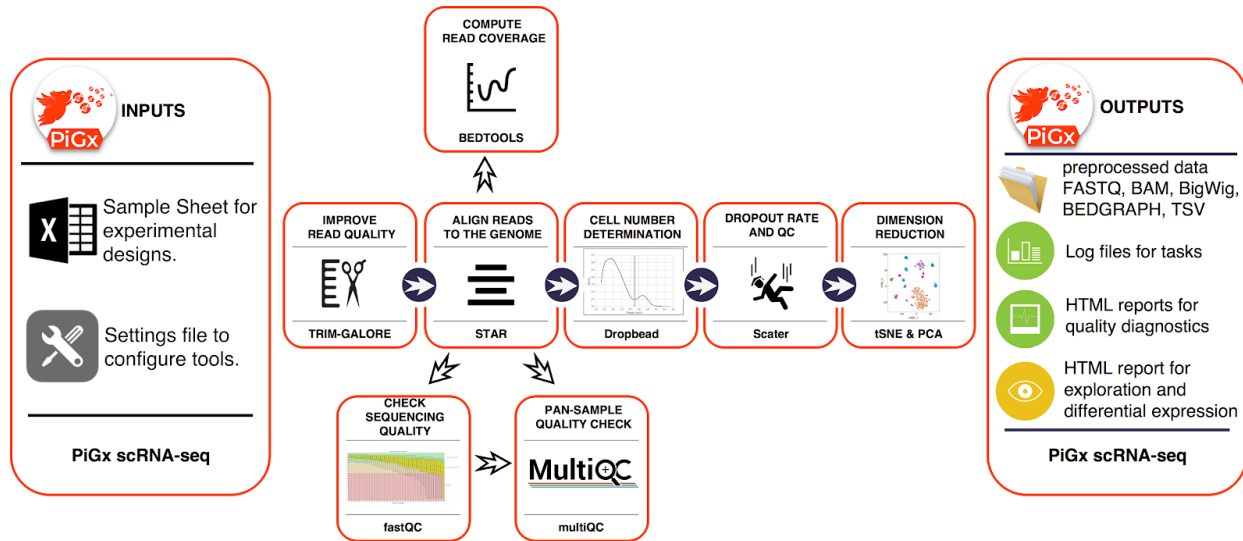

Figure 7  
Workflow diagram for PiGx-scRNA-seq pipeline.

## scRNA-seq Use Case

To showcase the capabilities of PiGx scRNA-seq, we ran the pipeline on isolated single nuclei from the mouse brain (Hu *et al.* 2017). In this study, the authors developed a gradient-based method for nucleus separation, and used it in combination with Drop-seq to profile the transcriptomes of more than 18,000 single nuclei. Figure 8 shows a part of the quality control output from the PiGx scRNA-seq pipeline. Figure 8A shows the per sample number of total and uniquely mapped reads. Figure 8B visualizes the cells on the first two principal components. The color gradient corresponds to the number of detected genes per cells. The figure shows that the total number of detected genes strongly correlates with the first two principal components. Figure 8C is analogous to figure 7B of the original publication, with the color scheme representing labeling each cell with its respective stage of the cell-cycle. Thus, figure 8C shows that the first two principal components correlate with the stage of the cell cycle. The heatmap in figure 8D shows scaled normalized expression values for genes that contribute the most to the first principle component. High read-count variability in a small number of genes drives the variation around the first principle component. The column-wise annotations show that the variation is driven mainly by cells in the G1 phase of the cell-cycle from the second biological replicate. The HTML report for this analysis can be accessed here:

<http://bioinformatics.mdc-berlin.de/pigx/supplementary-materials.html>

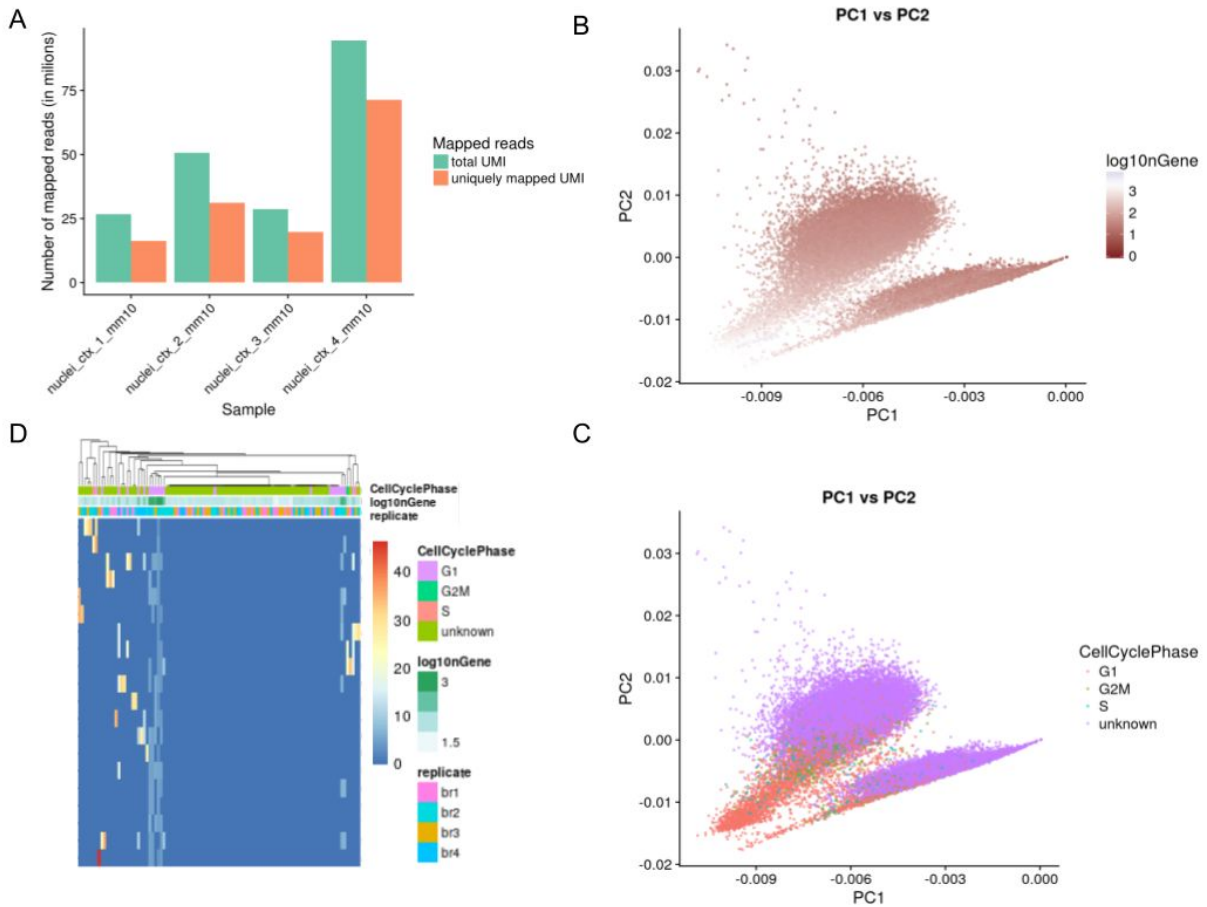

Figure 8

Sample output from the PiGx scRNA-seq pipeline. **A)** Abundance of total uniquely mapping UMIs per sample. **B)** Visualization of cells on the first and second principal component calculated from the normalized expression values. The gradient shows the total number of UMIs per cell. **C)** Same data representation as in B, but colored based on the cell cycle assignment. Cell cycle was assigned using the cyclone function from the scran Bioconductor package (A. T. Lun, McCarthy, and Marioni 2016). **D)** Expression heatmap of genes contributing most to the first principle component. Genes are ordered in rows, while cell are in columns. Color bars above the heatmap show relevant experimental variables.

## Reproducibility metrics of the pipelines in different systems

We define the complete software environment needed for each of the pipelines using Guix package definitions. These package specifications not only outline the immediate dependencies of the pipelines, but extend to the full software stack recursively. The dependency graph is

1  
2  
3  
4 rooted in a handful of bootstrap binaries. Apart from these binary roots, every application or  
5 library in the graph is built from source. Guix ensures that packages are built in an isolated  
6 environment in which nothing but the specified dependencies are available. This is a  
7 precondition for bit-reproducible builds, i.e. repeatable package builds that yield the very same  
8 binary output for the same set of inputs. Under ideal circumstances (see below), a Guix  
9 specification for the complete dependency graph and the set of all source code would be  
10 sufficient to exactly reproduce the very same binaries of the pipelines presented in this paper.  
11  
12  
13

14  
15 Unfortunately, there are additional obstacles to bit-reproducibility that cannot be avoided purely  
16 by the functional package management model. Examples for sources of irreproducibility in build  
17 artefacts include embedded timestamps, non-deterministic sorting of strings, non-deterministic  
18 compiler output, and the like. While some of these obstacles can be removed by deliberate  
19 patching of compilers or applications, others are harder to diagnose and can thus lead to failure  
20 to reproduce the same arrangement of bits in independent builds, be that on the same machine  
21 at different points in time or on different systems. **In the reports produced by our pipelines we  
22 can eliminate differences due to timestamps by controlling them with the  
23 SOURCE\_DATE\_EPOCH environment variable. This option can be invoked, in order to  
24 produce identical HTML reports, provided there are no tools that introduce non-determinism (as  
25 is the case for the PiGx BS-seq pipeline).**  
26  
27  
28  
29

30  
31 To estimate the level of bit reproducibility in our pipelines, we checked out version  
32 v0.14.0-3597-g17967d1 of GNU Guix, repeatedly built the pipeline packages `pigx-rnaseq`,  
33 `pigx-bsseq`, `pigx-chipseq`, `pigx-scrnaseq` and their direct dependencies on three  
34 different systems (an office workstation, a virtual machine, and a build farm consisting of 20  
35 heterogeneous build nodes), and recorded the hashes of the package trees that were produced.  
36 Whenever the hashes of any two builds differed, we looked at the exact differences with  
37 diffoscope (<https://diffoscope.org/>). Upon closer inspection we identified a number of common  
38 issues in non-deterministic builds, such as timestamps embedded in compiled binaries and text  
39 files, or randomized file names in files generated by test suites.  
40  
41  
42  
43

44 Python dependencies are of particular note here, because they are generally not reproducible  
45 due to the fact that the byte compiler records the timestamp of the source file in the compiled  
46 binary. This means that all compiled Python files will differ when they are compiled at different  
47 points in time. (This problem will be addressed in the upcoming Python 3.7, which will  
48 implement PEP 552 for deterministic compilation.) To avoid this problem and increase the  
49 number of packages that could be made reproducible, we patched our variant of Python 3.6  
50 such that it resets the embedded timestamp in compiled files to the Unix epoch. This allowed us  
51 to greatly increase the number of fully bit-reproducible packages. As can be seen in Table 2,  
52 only a total of 8 out of 355 packages (or only about 2.2%) were not bit-reproducible for as-yet  
53 unknown reasons.  
54  
55  
56  
57

58  
59 Figure 9 shows the degree of bit-reproducibility for the direct dependencies of each of the  
60 individual pipeline packages. Dependent packages whose files differed compared to builds on  
61  
62  
63  
64  
65

other systems fell either in the category of “minor problems” or “not reproducible”, dependent on the source and magnitude of non-determinism. The exact dependency counts for each category and pipeline package are listed in Table 2. A comprehensive list of all dependent packages that were categorized as having “minor problems” is contained in Table 3. This table shows that the reproducibility problems of these packages are of negligible magnitude and could be corrected with minor patches to the package definitions in Guix.

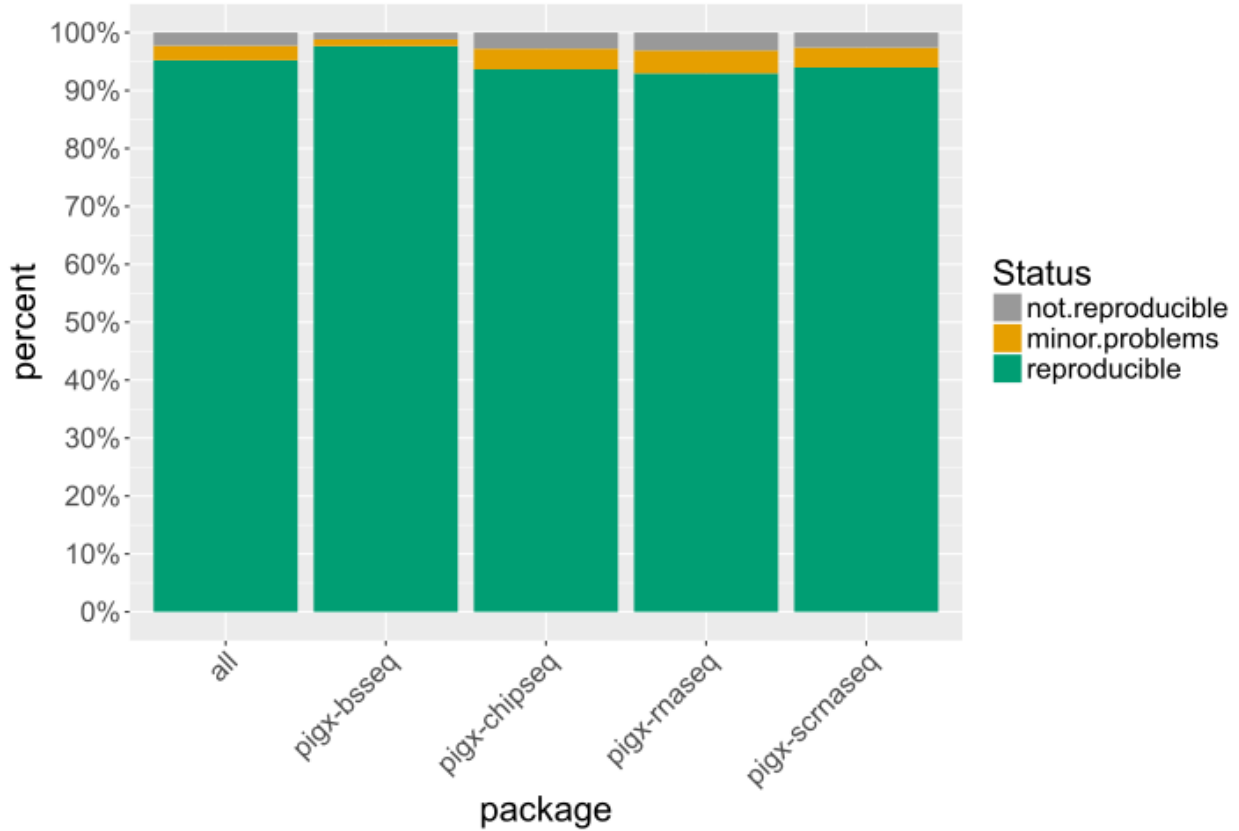

Figure 9  
 Percentage of directly-dependent packages building in a bit-reproducible fashion across different systems for each of the pipelines.

| Package       | Not reproducible | Minor problems | Reproducible |
|---------------|------------------|----------------|--------------|
| pigx-bsseq    | 2                | 2              | 167          |
| pigx-chipseq  | 7                | 9              | 236          |
| pigx-maseq    | 7                | 9              | 211          |
| pigx-scrnaseq | 6                | 8              | 218          |

|               |   |   |     |
|---------------|---|---|-----|
| All pipelines | 8 | 9 | 338 |
|---------------|---|---|-----|

Table 2

Number of dependent packages and their reproducibility status. See Table 3 for more details about packages with minor problems.

| Package           | Magnitude | Notes                                      |
|-------------------|-----------|--------------------------------------------|
| r-minimal         | 2 bytes   | non-deterministic line break               |
| python            | ~ 6%      | timestamp byte in header of bytecode files |
| python-matplotlib | ~ 1.7%    | single file difference                     |
| python-pycparser  | ~ 3%      | single file with timestamp                 |
| python-cffi       | ~ 1.8%    | recorded random test file names            |
| python-numpy      | < 0.5%    | six bytecode files differ                  |
| python-simplejson | 2 bytes   | two files have single byte differences     |
| gtk+              | < 1%      | single file (icon cache)                   |
| glib              | < 0.1%    | single file difference                     |

Table 3

Table of packages with minor reproducibility problems and the magnitude of irreproducible files.

## Alternative ways to install the pipelines:

We generated application bundles containing all pipelines for use with Docker or Singularity. These container images were generated by exporting the "closure" (i.e. the package and all packages it references, recursively) of the `pigx` package (a package containing the individual pipeline packages `pigx-bsseq`, `pigx-chipseq`, `pigx-rnaseq`, and `pigx-scrnaseq`) from the declarative Guix package definition instead of iteratively modifying a base image containing a GNU+Linux operating system in a series of imperative steps. The container images are merely a translation of a functional description of the desired environment; as such, it is independent of global state, such as the contents of third-party package repositories or build time. The Docker image can be obtained at <https://hub.docker.com/r/bimsbbioinfo/pigx/>; the



1  
2  
3  
4 Singularity image can be downloaded from  
5 <https://bioinformatics.mdc-berlin.de/pigx/supplementary-materials.html>. We used Guix at commit  
6 5149aeb7e62cf62398b55be38469cd28c25d8d7d (version v0.14.0-7054-g5149aeb7e) to  
7 generate these container images. This is the same version that we used to install the variant of  
8 PiGx with which the plots and reports in this publication were generated.  
9

10 Since the pipelines use the well-known GNU build system as implemented by the Autotools  
11 suite, the pipelines can be configured and built in any environment providing the required  
12 dependencies. The portable configure script detects and records references to necessary  
13 software in the environment and reuses them at runtime using their absolute file names. Any  
14 package manager (such as Conda) can be used to fashion such a build-time environment. With  
15 regards to reproducibility, however, we recommend that a package manager be used that can  
16 provide separate, immutable, and uniquely prefixed environments to ensure that references to  
17 tools that are recorded at configuration time are identical to the variants that are used at  
18 runtime.  
19  
20  
21  
22  
23

## 24 Discussion

25  
26  
27 Computational workflows are becoming an indispensable part of the biological sciences as the  
28 field becomes more data intensive. The diversity and amount of data requires many tools for  
29 analysis.  
30

31 Consequently, published software or workflows often come with a complex set of dependencies.  
32 Even if sensible guidelines (e.g. “Software with Impact” 2014), such as sharing code online and  
33 providing documentation, are employed, sometimes it is impossible to recreate the software  
34 used for analysis. Providing the code and documentation alone does not guarantee  
35 reproducibility or usability, nor do Docker containers completely remedy this problem.  
36

37 In addition to reproducibility, there is also an increasing need for traceability and transparency,  
38 for the purposes of comprehensive data security in applications that manage the sensitive data  
39 collected in biomedical studies.  
40  
41

42  
43 We propose GNU Guix and principled pipeline-as-software implementation as a solution to  
44 reproducibility problems in complex bioinformatics workflows. Here, we demonstrated the utility  
45 and the reproducibility of PiGx pipelines for genomics data analysis using GNU Guix.  
46  
47

48 Our decision to treat pipelines as first-class software packages and to adopt a conventional  
49 build system with Autotools made it possible to reduce the installation of complex software  
50 environments to a simple one-line command. By recording the exact locations of runtime  
51 dependencies of the pipeline packages during the configuration stage, we were able to  
52 eliminate ambiguity at runtime. When configuring the pipeline packages in an environment that  
53 ensures that different versions or variants of applications and libraries are stored in unique  
54 locations (such as an environment provided by GNU Guix), recording the exact location of  
55 dependencies at *configuration time* allows us to reproduce the detected environment at *runtime*.  
56  
57  
58  
59  
60  
61  
62  
63  
64  
65



1  
2  
3  
4 We have shown that with a recursive definition of software dependencies using the framework  
5 provided by the functional package management paradigm as implemented in GNU Guix, it is  
6 possible to fully and exhaustively describe complex production-level bioinformatics software  
7 environments **on GNU+Linux systems**. The software environments were fully specified at the  
8 level of declarative, stateless package abstractions instead of using an imperative, stateful  
9 approach. We have also shown that the principled declarative approach to the management of  
10 software environments facilitates bit-reproducibility. The higher-level definitions of software  
11 environments can be translated in an automated fashion to lower-level application bundles such  
12 as Docker images. In contrast with container systems like Docker or Singularity, Guix encloses  
13 the complete software environment and enables users to transparently rebuild it reproducibly  
14 from source without having to trust a binary application bundle. Due to referential transparency,  
15 binaries in Guix can only be the result of their corresponding sources.  
16  
17  
18

19  
20 Functional package management as implemented by GNU Guix significantly reduces the  
21 complexity of, and lowers the barrier to, managing bit-reproducible software environments.  
22 Users are freed from menial bookkeeping tasks such as keeping track of the origin of package  
23 binaries, the time of installation, the order of installation instructions, the state of the operating  
24 system at the time of installation, or any other runtime state. As far as users are concerned, it is  
25 enough to know the names of the packages that should be installed (in our case, simply “pigx”)  
26 and the current version of Guix; everything else such as source code provenance tracking,  
27 dependency management, package configuration, and compilation in isolated environments is  
28 handled by Guix. The guarantees provided by Guix enable users to analyze obstacles to  
29 experimental reproducibility beyond the software environment, such as sources of  
30 non-determinism at *runtime*.  
31  
32

33  
34 In our attempts to analyze the degree of repeatability of the HTML reports produced by PiGx,  
35 we identified a number of such sources of non-determinism. The Salmon aligner, for example,  
36 has a random component and does not provide a way for users to specify a seed for the  
37 pseudo-random number generators. This makes it impossible to exactly repeat an analysis and  
38 may require patching of the Salmon source code or virtualization of the random number  
39 generator facilities of the host system. Other tools are sensitive to the user's locale settings and  
40 may generate output in non-deterministic order. We were also surprised to find that an  
41 increasingly large number of tools rely on a connection to the Internet, either directly or indirectly  
42 through dependent packages. This can be a great source of non-determinism if the  
43 experimental setup does not take the volatile nature of networked resources into account.  
44 Another important obstacle to reproducibility is the large kernel binary at runtime. Although the  
45 GNU C library provides a unified interface for all applications to use, the features that are  
46 actually implemented by the kernel at runtime may differ vastly. For example, the variant of  
47 Linux provided by Red Hat for their series 6 of operating systems reports its version as the  
48 obsolete and unsupported 2.6.32, but it contains many backported features from much newer  
49 kernel versions. Although this is usually not a problem, the kernel version and the implemented  
50 features should be taken into account. **In order to make it possible to use the pipelines on Red  
51 Hat Enterprise Linux 6, we coordinated with other Guix developers to patch the GNU C library.**  
52  
53  
54  
55  
56

57  
58 The use of a declarative mechanism to managing software environments is fundamental to  
59 comprehensive reproducibility. This encompasses repeatable builds, bit-reproducible binaries,  
60  
61  
62  
63  
64  
65

1  
2  
3  
4 software and data provenance, control over the configuration space, and deterministic runtime  
5 behavior. We have shown the feasibility of this approach in the domain of bioinformatics, and  
6 propose that it serve as a template for reproducible computational workflows in other areas.  
7  
8  
9

## 10 Acknowledgements

11 We are grateful to the many volunteer contributors to GNU Guix who keep improving the  
12 system.  
13  
14  
15

## 16 Funding

17 B.U acknowledges funding by the German Federal Ministry of Education and Research (BMBF)  
18 as part of the RNA Bioinformatics Center of the German Network for Bioinformatics  
19 Infrastructure (de.NBI) [031 A538C RBC (de.NBI)]. We also acknowledge support for K.W from  
20 Berlin Institute of Health (BIH). This project has received funding from the European Union's  
21 Horizon 2020 research and innovation programme under grant agreement No 654248  
22  
23  
24  
25  
26  
27  
28  
29

## 30 References

- 31  
32  
33  
34  
35 Akalin, Altuna, Vedran Franke, Kristian Vlahoviček, Christopher E. Mason, and Dirk Schübeler.  
36 2015. "Genomation: A Toolkit to Summarize, Annotate and Visualize Genomic Intervals."  
37 *Bioinformatics* 31 (7): 1127–29.  
38  
39 Alles, Jonathan, Nikos Karaiskos, Samantha D. Praktijnjo, Stefanie Grosswendt, Philipp Wahle,  
40 Pierre-Louis Ruffault, Salah Ayoub, et al. 2017. "Cell Fixation and Preservation for  
41 Droplet-Based Single-Cell Transcriptomics." *BMC Biology* 15 (1): 44.  
42 Babraham, Bioinformatics. 2018a. "fastQC." 2018.  
43 <https://www.bioinformatics.babraham.ac.uk/projects/fastqc/>.  
44 ———. 2018b. "Trim Galore!" 2018.  
45 [https://www.bioinformatics.babraham.ac.uk/projects/trim\\_galore/](https://www.bioinformatics.babraham.ac.uk/projects/trim_galore/).  
46  
47 Boettiger, Carl. 2015. "An Introduction to Docker for Reproducible Research." *ACM SIGOPS*  
48 *Operating Systems Review* 49 (1): 71–79.  
49 **Courtès, Ludovic, and Ricardo Wurmus. "Reproducible and user-controlled software**  
50 **environments in HPC with Guix." *European Conference on Parallel Processing*. Springer,**  
51 **Cham, 2015.**  
52  
53 Dobin, Alexander, Carrie A. Davis, Felix Schlesinger, Jorg Drenkow, Chris Zaleski, Sonali Jha,  
54 Philippe Batut, Mark Chaisson, and Thomas R. Gingeras. 2013. "STAR: Ultrafast Universal  
55 RNA-Seq Aligner." *Bioinformatics* 29 (1): 15–21.  
56 **Dolstra, Eelco, Merijn De Jonge, and Eelco Visser. "Nix: A Safe and Policy-Free System for**  
57 **Software Deployment." *LISA*. Vol. 4. 2004.**  
58  
59 Ewels, Philip, Måns Magnusson, Sverker Lundin, and Max Käller. 2016. "MultiQC: Summarize  
60 Analysis Results for Multiple Tools and Samples in a Single Report." *Bioinformatics* 32 (19):  
61  
62  
63  
64  
65

- 3047–48.
- Hon, Gary C., Chun-Xiao Song, Tingting Du, Fulai Jin, Siddarth Selvaraj, Ah Young Lee, Chia-An Yen, et al. 2014. “5mC Oxidation by Tet2 Modulates Enhancer Activity and Timing of Transcriptome Reprogramming during Differentiation.” *Molecular Cell* 56 (2): 286–97.
- Huber, Wolfgang, Vincent J. Carey, Robert Gentleman, Simon Anders, Marc Carlson, Benilton S. Carvalho, Hector Corrada Bravo, et al. 2015. “Orchestrating High-Throughput Genomic Analysis with Bioconductor.” *Nature Methods* 12 (2): 115–21.
- Hu, Peng, Emily Fabyanic, Deborah Y. Kwon, Sheng Tang, Zhaolan Zhou, and Hao Wu. 2017. “Dissecting Cell-Type Composition and Activity-Dependent Transcriptional State in Mammalian Brains by Massively Parallel Single-Nucleus RNA-Seq.” *Molecular Cell* 68 (5): 1006–15.e7.
- Klein, Allon M., Linas Mazutis, Ilke Akartuna, Naren Tallapragada, Adrian Veres, Victor Li, Leonid Peshkin, David A. Weitz, and Marc W. Kirschner. 2015. “Droplet Barcoding for Single-Cell Transcriptomics Applied to Embryonic Stem Cells.” *Cell* 161 (5): 1187–1201.
- Kolde, Raivo. 2018. “Pheatmap: Pretty Heatmaps. R Package Version 1.0.8.” CRAN. <https://CRAN.R-project.org/package=pheatmap>.
- Köster, Johannes, and Sven Rahmann. 2012. “Snakemake--a Scalable Bioinformatics Workflow Engine.” *Bioinformatics* 28 (19): 2520–22.
- Krueger, Felix, and Simon R. Andrews. 2011. “Bismark: A Flexible Aligner and Methylation Caller for Bisulfite-Seq Applications.” *Bioinformatics* 27 (11): 1571–72.
- Landt, Stephen G., Georgi K. Marinov, Anshul Kundaje, Pouya Kheradpour, Florencia Pauli, Serafim Batzoglou, Bradley E. Bernstein, et al. 2012. “ChIP-Seq Guidelines and Practices of the ENCODE and modENCODE Consortia.” *Genome Research* 22 (9): 1813–31.
- Langmead, Ben, and Steven L. Salzberg. 2012. “Fast Gapped-Read Alignment with Bowtie 2.” *Nature Methods* 9 (4): 357–59.
- Lawrence, Michael, Wolfgang Huber, Hervé Pagès, Patrick Aboyoun, Marc Carlson, Robert Gentleman, Martin T. Morgan, and Vincent J. Carey. 2013. “Software for Computing and Annotating Genomic Ranges.” *PLoS Computational Biology* 9 (8): e1003118.
- Li, Heng, Bob Handsaker, Alec Wysoker, Tim Fennell, Jue Ruan, Nils Homer, Gabor Marth, Goncalo Abecasis, Richard Durbin, and 1000 Genome Project Data Processing Subgroup. 2009. “The Sequence Alignment/Map Format and SAMtools.” *Bioinformatics* 25 (16): 2078–79.
- Linnarsson. 2018. “Loompy: Python Implementation of the Loom File Format.” 2018. <http://loompy.org>.
- Li, Qunhua, James B. Brown, Haiyan Huang, and Peter J. Bickel. 2011. “Measuring Reproducibility of High-Throughput Experiments.” *The Annals of Applied Statistics* 5 (3): 1752–79.
- Love, Michael I., Wolfgang Huber, and Simon Anders. 2014. “Moderated Estimation of Fold Change and Dispersion for RNA-Seq Data with DESeq2.” *Genome Biology* 15 (12): 550.
- Lun, Aaran, Kevin Rue, Federico Marini, C. Sonesson, and Mark Robinson. 2018. “iSEE - Interactive SummarizedExperiment/SingleCellExperiment Explorer.” 2018. <https://github.com/csonesson/iSEE>.
- Lun, Aaron, and Davide Risso. 2018. “Single Cell Experiment: S4 Classes for Single Cell Data.” *Bioconductor*.
- Lun, Aaron T. L., Davis J. McCarthy, and John C. Marioni. 2016. “A Step-by-Step Workflow for Low-Level Analysis of Single-Cell RNA-Seq Data with Bioconductor.” *F1000Research* 5 (August): 2122.
- Macosko, Evan Z., Anindita Basu, Rahul Satija, James Nemesh, Karthik Shekhar, Melissa

- 1  
2  
3  
4 Goldman, Itay Tirosh, et al. 2015. "Highly Parallel Genome-Wide Expression Profiling of  
5 Individual Cells Using Nanoliter Droplets." *Cell* 161 (5): 1202–14.  
6  
7 Pagès, Hervé. 2018. "DelayedArray: Delayed Operations on Array-like Objects." *Bioconductor*.  
8  
9 Patro, Rob, Geet Duggal, Michael I. Love, Rafael A. Irizarry, and Carl Kingsford. 2017. "Salmon  
10 Provides Fast and Bias-Aware Quantification of Transcript Expression." *Nature Methods* 14  
11 (4): 417–19.  
12  
13 Peng, Roger D. 2011. "Reproducible Research in Computational Science." *Science* 334 (6060):  
14 1226–27.  
15  
16 Quinlan, Aaron R., and Ira M. Hall. 2010. "BEDTools: A Flexible Suite of Utilities for Comparing  
17 Genomic Features." *Bioinformatics* 26 (6): 841–42.  
18  
19 Rampal, Raajit, Altuna Alkalin, Jozef Madzo, Aparna Vasanthakumar, Elodie Pronier, Jay Patel,  
20 Yushan Li, et al. 2014. "DNA Hydroxymethylation Profiling Reveals That WT1 Mutations  
21 Result in Loss of TET2 Function in Acute Myeloid Leukemia." *Cell Reports* 9 (5): 1841–55.  
22  
23 Reimand, Jüri, Meelis Kull, Hedi Peterson, Jaanus Hansen, and Jaak Vilo. 2007. "g:Profiler--a  
24 Web-Based Toolset for Functional Profiling of Gene Lists from Large-Scale Experiments."  
25 *Nucleic Acids Research* 35 (Web Server issue): W193–200.  
26  
27 Risso, Davide, Fanny Perraudeau, Svetlana Gribkova, Sandrine Dudoit, and Jean-Philippe Vert.  
28 2018. "A General and Flexible Method for Signal Extraction from Single-Cell RNA-Seq  
29 Data." *Nature Communications* 9 (1): 284.  
30  
31 Robinson, James T., Helga Thorvaldsdóttir, Wendy Winckler, Mitchell Guttman, Eric S. Lander,  
32 Gad Getz, and Jill P. Mesirov. 2011. "Integrative Genomics Viewer." *Nature Biotechnology*  
33 29 (1): 24–26.  
34  
35 Ronen, Jonathan, and Altuna Akalin. 2018. "Network-Smoothing Based Imputation for Single  
36 Cell RNA-Seq." *F1000Research* 7 (January): 8.  
37  
38 Shu, Rui, Xiaohui Gu, and William Enck. 2017. "A Study of Security Vulnerabilities on Docker  
39 Hub". In *Proceedings of the Seventh ACM on Conference on Data and Application Security  
40 and Privacy (CODASPY '17)*. ACM, New York, NY, USA, 269-280. DOI:  
41 <https://doi.org/10.1145/3029806.3029832>  
42  
43 "Software with Impact." 2014. *Nature Methods* 11 (February). Nature Publishing Group, a  
44 division of Macmillan Publishers Limited. All Rights Reserved.: 211.  
45  
46 Thorvaldsdóttir, Helga, James T. Robinson, and Jill P. Mesirov. 2013. "Integrative Genomics  
47 Viewer (IGV): High-Performance Genomics Data Visualization and Exploration." *Briefings in  
48 Bioinformatics* 14 (2): 178–92.  
49  
50 Zhang, Yong, Tao Liu, Clifford A. Meyer, Jérôme Eeckhoutte, David S. Johnson, Bradley E.  
51 Bernstein, Chad Nusbaum, et al. 2008. "Model-Based Analysis of ChIP-Seq (MACS)."  
52 *Genome Biology* 9 (9): R137.  
53  
54  
55  
56  
57  
58  
59  
60  
61  
62  
63  
64  
65
