# Supplementary material for: PiGx: reproducible genomics analysis pipelines with GNU Guix
Source: PubMed Central journal article supplement (PMC6275446; doi:10.1093/gigascience/giy123), 2018-10-02
Supplement: giy123_giga-d-18-00155_revision_2.pdf [file giy123_giga-d-18-00155_revision_2.pdf]

|                                                      |                                                                                                                                                                                                                                                                                                                                                                                                                                                                                                                                                                                                                                                                                                                                                                                                                                                                                                                                                                                                                                                                                                                                                                                                                                                                                                                                                                                                                                                                                                                                                                                                                                                                                                                                                                                                                                                                                                                                                                                                                                                                                                          |                         |
|------------------------------------------------------|----------------------------------------------------------------------------------------------------------------------------------------------------------------------------------------------------------------------------------------------------------------------------------------------------------------------------------------------------------------------------------------------------------------------------------------------------------------------------------------------------------------------------------------------------------------------------------------------------------------------------------------------------------------------------------------------------------------------------------------------------------------------------------------------------------------------------------------------------------------------------------------------------------------------------------------------------------------------------------------------------------------------------------------------------------------------------------------------------------------------------------------------------------------------------------------------------------------------------------------------------------------------------------------------------------------------------------------------------------------------------------------------------------------------------------------------------------------------------------------------------------------------------------------------------------------------------------------------------------------------------------------------------------------------------------------------------------------------------------------------------------------------------------------------------------------------------------------------------------------------------------------------------------------------------------------------------------------------------------------------------------------------------------------------------------------------------------------------------------|-------------------------|
| <b>Manuscript Number:</b>                            | GIGA-D-18-00155R2                                                                                                                                                                                                                                                                                                                                                                                                                                                                                                                                                                                                                                                                                                                                                                                                                                                                                                                                                                                                                                                                                                                                                                                                                                                                                                                                                                                                                                                                                                                                                                                                                                                                                                                                                                                                                                                                                                                                                                                                                                                                                        |                         |
| <b>Full Title:</b>                                   | PiGx: Reproducible genomics analysis pipelines with GNU Guix                                                                                                                                                                                                                                                                                                                                                                                                                                                                                                                                                                                                                                                                                                                                                                                                                                                                                                                                                                                                                                                                                                                                                                                                                                                                                                                                                                                                                                                                                                                                                                                                                                                                                                                                                                                                                                                                                                                                                                                                                                             |                         |
| <b>Article Type:</b>                                 | Technical Note                                                                                                                                                                                                                                                                                                                                                                                                                                                                                                                                                                                                                                                                                                                                                                                                                                                                                                                                                                                                                                                                                                                                                                                                                                                                                                                                                                                                                                                                                                                                                                                                                                                                                                                                                                                                                                                                                                                                                                                                                                                                                           |                         |
| <b>Funding Information:</b>                          | German Federal Ministry of Education and Research (BMBF) (031 A538C RBC)                                                                                                                                                                                                                                                                                                                                                                                                                                                                                                                                                                                                                                                                                                                                                                                                                                                                                                                                                                                                                                                                                                                                                                                                                                                                                                                                                                                                                                                                                                                                                                                                                                                                                                                                                                                                                                                                                                                                                                                                                                 | Dr Bora Uyar            |
|                                                      | Berlin Institute for Health                                                                                                                                                                                                                                                                                                                                                                                                                                                                                                                                                                                                                                                                                                                                                                                                                                                                                                                                                                                                                                                                                                                                                                                                                                                                                                                                                                                                                                                                                                                                                                                                                                                                                                                                                                                                                                                                                                                                                                                                                                                                              | Mrs Katarzyna Wreczycka |
|                                                      | H2020 Research Infrastructures (654248)                                                                                                                                                                                                                                                                                                                                                                                                                                                                                                                                                                                                                                                                                                                                                                                                                                                                                                                                                                                                                                                                                                                                                                                                                                                                                                                                                                                                                                                                                                                                                                                                                                                                                                                                                                                                                                                                                                                                                                                                                                                                  | Dr Brendan Osberg       |
| <b>Abstract:</b>                                     | <p>In bioinformatics, as well as other computationally-intensive research fields, there is a need for workflows that can reliably produce consistent output, from known sources, independent of the software environment or configuration settings of the machine on which they are executed. Indeed, this is essential for controlled comparison between different observations or for the wider dissemination of workflows. Providing this type of reproducibility and traceability, however, is often complicated by the need to accommodate the myriad dependencies included in a larger body of software, each of which generally come in various versions. Moreover, in many fields (bioinformatics being a prime example), these versions are subject to continual change due to rapidly evolving technologies, further complicating problems related to reproducibility. Here, we propose a principled approach for building analysis pipelines and managing their dependencies with GNU Guix. As a case study to demonstrate the utility of our approach, we present a set of highly reproducible pipelines called PiGx for the analysis of RNA-seq, ChIP-seq, Bisulfite-seq, and single-cell RNA-seq. All pipelines process raw experimental data, and generate reports containing publication-ready plots and figures, with interactive report elements and standard observables. Users may install these highly reproducible packages and apply them to their own datasets without any special computational expertise beyond the use of the command line. We hope such a toolkit will provide immediate benefit to laboratory workers wishing to process their own data sets or bioinformaticians seeking to automate all, or parts of, their analyses. In the long term, we hope our approach to reproducibility will serve as a blueprint for reproducible workflows in other areas. Our pipelines, along with their corresponding documentation and sample reports, are available at <a href="http://bioinformatics.mdc-berlin.de/pigx">http://bioinformatics.mdc-berlin.de/pigx</a></p> |                         |
| <b>Corresponding Author:</b>                         | Altuna Akalin                                                                                                                                                                                                                                                                                                                                                                                                                                                                                                                                                                                                                                                                                                                                                                                                                                                                                                                                                                                                                                                                                                                                                                                                                                                                                                                                                                                                                                                                                                                                                                                                                                                                                                                                                                                                                                                                                                                                                                                                                                                                                            |                         |
| <b>Corresponding Author Secondary Information:</b>   |                                                                                                                                                                                                                                                                                                                                                                                                                                                                                                                                                                                                                                                                                                                                                                                                                                                                                                                                                                                                                                                                                                                                                                                                                                                                                                                                                                                                                                                                                                                                                                                                                                                                                                                                                                                                                                                                                                                                                                                                                                                                                                          |                         |
| <b>Corresponding Author's Institution:</b>           |                                                                                                                                                                                                                                                                                                                                                                                                                                                                                                                                                                                                                                                                                                                                                                                                                                                                                                                                                                                                                                                                                                                                                                                                                                                                                                                                                                                                                                                                                                                                                                                                                                                                                                                                                                                                                                                                                                                                                                                                                                                                                                          |                         |
| <b>Corresponding Author's Secondary Institution:</b> |                                                                                                                                                                                                                                                                                                                                                                                                                                                                                                                                                                                                                                                                                                                                                                                                                                                                                                                                                                                                                                                                                                                                                                                                                                                                                                                                                                                                                                                                                                                                                                                                                                                                                                                                                                                                                                                                                                                                                                                                                                                                                                          |                         |
| <b>First Author:</b>                                 | Ricardo Wurmus                                                                                                                                                                                                                                                                                                                                                                                                                                                                                                                                                                                                                                                                                                                                                                                                                                                                                                                                                                                                                                                                                                                                                                                                                                                                                                                                                                                                                                                                                                                                                                                                                                                                                                                                                                                                                                                                                                                                                                                                                                                                                           |                         |
| <b>First Author Secondary Information:</b>           |                                                                                                                                                                                                                                                                                                                                                                                                                                                                                                                                                                                                                                                                                                                                                                                                                                                                                                                                                                                                                                                                                                                                                                                                                                                                                                                                                                                                                                                                                                                                                                                                                                                                                                                                                                                                                                                                                                                                                                                                                                                                                                          |                         |
| <b>Order of Authors:</b>                             | Ricardo Wurmus                                                                                                                                                                                                                                                                                                                                                                                                                                                                                                                                                                                                                                                                                                                                                                                                                                                                                                                                                                                                                                                                                                                                                                                                                                                                                                                                                                                                                                                                                                                                                                                                                                                                                                                                                                                                                                                                                                                                                                                                                                                                                           |                         |
|                                                      | Bora Uyar                                                                                                                                                                                                                                                                                                                                                                                                                                                                                                                                                                                                                                                                                                                                                                                                                                                                                                                                                                                                                                                                                                                                                                                                                                                                                                                                                                                                                                                                                                                                                                                                                                                                                                                                                                                                                                                                                                                                                                                                                                                                                                |                         |
|                                                      | Brendan Osberg                                                                                                                                                                                                                                                                                                                                                                                                                                                                                                                                                                                                                                                                                                                                                                                                                                                                                                                                                                                                                                                                                                                                                                                                                                                                                                                                                                                                                                                                                                                                                                                                                                                                                                                                                                                                                                                                                                                                                                                                                                                                                           |                         |
|                                                      | Vedran Franke                                                                                                                                                                                                                                                                                                                                                                                                                                                                                                                                                                                                                                                                                                                                                                                                                                                                                                                                                                                                                                                                                                                                                                                                                                                                                                                                                                                                                                                                                                                                                                                                                                                                                                                                                                                                                                                                                                                                                                                                                                                                                            |                         |
|                                                      | Alexander Gosdschan                                                                                                                                                                                                                                                                                                                                                                                                                                                                                                                                                                                                                                                                                                                                                                                                                                                                                                                                                                                                                                                                                                                                                                                                                                                                                                                                                                                                                                                                                                                                                                                                                                                                                                                                                                                                                                                                                                                                                                                                                                                                                      |                         |
|                                                      | Katarzyna Wreczycka                                                                                                                                                                                                                                                                                                                                                                                                                                                                                                                                                                                                                                                                                                                                                                                                                                                                                                                                                                                                                                                                                                                                                                                                                                                                                                                                                                                                                                                                                                                                                                                                                                                                                                                                                                                                                                                                                                                                                                                                                                                                                      |                         |
|                                                      |                                                                                                                                                                                                                                                                                                                                                                                                                                                                                                                                                                                                                                                                                                                                                                                                                                                                                                                                                                                                                                                                                                                                                                                                                                                                                                                                                                                                                                                                                                                                                                                                                                                                                                                                                                                                                                                                                                                                                                                                                                                                                                          |                         |

|                                                                                                                                                                                                                                                                                                  |                                                                                                                                                                                                                                                                                                                                                                                                                                                                                                                                                                                                                                                                                                                                                                                                                                                                                                                                                                                                                                                                                                                                                                                                                                                                                                                                                                                                                                                                                                                                                                                                                                                                                                                                                                                                                                                                                                                                                                                                                                                                                                                               |
|--------------------------------------------------------------------------------------------------------------------------------------------------------------------------------------------------------------------------------------------------------------------------------------------------|-------------------------------------------------------------------------------------------------------------------------------------------------------------------------------------------------------------------------------------------------------------------------------------------------------------------------------------------------------------------------------------------------------------------------------------------------------------------------------------------------------------------------------------------------------------------------------------------------------------------------------------------------------------------------------------------------------------------------------------------------------------------------------------------------------------------------------------------------------------------------------------------------------------------------------------------------------------------------------------------------------------------------------------------------------------------------------------------------------------------------------------------------------------------------------------------------------------------------------------------------------------------------------------------------------------------------------------------------------------------------------------------------------------------------------------------------------------------------------------------------------------------------------------------------------------------------------------------------------------------------------------------------------------------------------------------------------------------------------------------------------------------------------------------------------------------------------------------------------------------------------------------------------------------------------------------------------------------------------------------------------------------------------------------------------------------------------------------------------------------------------|
|                                                                                                                                                                                                                                                                                                  | Jonathan Ronen                                                                                                                                                                                                                                                                                                                                                                                                                                                                                                                                                                                                                                                                                                                                                                                                                                                                                                                                                                                                                                                                                                                                                                                                                                                                                                                                                                                                                                                                                                                                                                                                                                                                                                                                                                                                                                                                                                                                                                                                                                                                                                                |
|                                                                                                                                                                                                                                                                                                  | Altuna Akalin                                                                                                                                                                                                                                                                                                                                                                                                                                                                                                                                                                                                                                                                                                                                                                                                                                                                                                                                                                                                                                                                                                                                                                                                                                                                                                                                                                                                                                                                                                                                                                                                                                                                                                                                                                                                                                                                                                                                                                                                                                                                                                                 |
| <b>Order of Authors Secondary Information:</b>                                                                                                                                                                                                                                                   |                                                                                                                                                                                                                                                                                                                                                                                                                                                                                                                                                                                                                                                                                                                                                                                                                                                                                                                                                                                                                                                                                                                                                                                                                                                                                                                                                                                                                                                                                                                                                                                                                                                                                                                                                                                                                                                                                                                                                                                                                                                                                                                               |
| <b>Response to Reviewers:</b>                                                                                                                                                                                                                                                                    | <p>We carried out the formatting changes requested below.</p> <p>&gt;You probably need to decide whether you brand this GNU Guix or PiGx in the title too. Whatever you decide on you should probably mention both names in the abstract as this will be the only way people find it from searching in pubmed.</p> <p>We are going with PiGx: Reproducible genomics analysis pipelines with GNU Guix. Abstract mentions both Guix and PiGx</p> <p>&gt;In addition, please register any new software application in the SciCrunch.org database to receive a RRID (Research Resource Identification Initiative ID) number, and include this in your manuscript. This will facilitate tracking, reproducibility and re-use of your tool.</p> <p>&gt;From an editorial perspective can you also add "Availability of source code" and "Availability of supporting data" sections at the end of your paper (just before the Acknowledgements). These should be formatted like this (please edit):</p> <p>&gt;Availability of supporting source code and requirements</p> <p>&gt;Project name: Pipelines in genomics</p> <p>&gt;Project home page: <a href="https://github.com/BIMSBbioinfo/pigx">https://github.com/BIMSBbioinfo/pigx</a></p> <p>&gt;Operating system(s): e.g. Platform independent</p> <p>&gt;Programming language: e.g. Java</p> <p>&gt;Other requirements: e.g. Java 1.3.1 or higher, Tomcat 4.0 or higher</p> <p>&gt;License: e.g. GNU GPL, FreeBSD etc.</p> <p>&gt;RRID: if applicable, e.g. RRID: SCR_014986</p> <p>This is done, we also obtained RRID.</p> <p>&gt;Availability of supporting data</p> <p>&gt;Snapshots of the code are available from the GigaScience GigaDB repository [Ref].</p> <p>&gt;Then in the references you need to cite the data in the paper (with the correct title) in the manner outlined:</p> <p>&gt;Wurmus R; Uyar B; Osberg B; Franke V; Godtschan A; Wreczycka K; Ronen J; Akalin A (2018): Data supporting "PiGx: Pipelines in Genomics" GigaScience Database. <a href="http://dx.doi.org/10.5524/100501">http://dx.doi.org/10.5524/100501</a></p> <p>This is done.</p> |
| <b>Additional Information:</b>                                                                                                                                                                                                                                                                   |                                                                                                                                                                                                                                                                                                                                                                                                                                                                                                                                                                                                                                                                                                                                                                                                                                                                                                                                                                                                                                                                                                                                                                                                                                                                                                                                                                                                                                                                                                                                                                                                                                                                                                                                                                                                                                                                                                                                                                                                                                                                                                                               |
| <b>Question</b>                                                                                                                                                                                                                                                                                  | <b>Response</b>                                                                                                                                                                                                                                                                                                                                                                                                                                                                                                                                                                                                                                                                                                                                                                                                                                                                                                                                                                                                                                                                                                                                                                                                                                                                                                                                                                                                                                                                                                                                                                                                                                                                                                                                                                                                                                                                                                                                                                                                                                                                                                               |
| Are you submitting this manuscript to a special series or article collection?                                                                                                                                                                                                                    | No                                                                                                                                                                                                                                                                                                                                                                                                                                                                                                                                                                                                                                                                                                                                                                                                                                                                                                                                                                                                                                                                                                                                                                                                                                                                                                                                                                                                                                                                                                                                                                                                                                                                                                                                                                                                                                                                                                                                                                                                                                                                                                                            |
| <b>Experimental design and statistics</b>                                                                                                                                                                                                                                                        | Yes                                                                                                                                                                                                                                                                                                                                                                                                                                                                                                                                                                                                                                                                                                                                                                                                                                                                                                                                                                                                                                                                                                                                                                                                                                                                                                                                                                                                                                                                                                                                                                                                                                                                                                                                                                                                                                                                                                                                                                                                                                                                                                                           |
| Full details of the experimental design and statistical methods used should be given in the Methods section, as detailed in our <a href="#">Minimum Standards Reporting Checklist</a> . Information essential to interpreting the data presented should be made available in the figure legends. |                                                                                                                                                                                                                                                                                                                                                                                                                                                                                                                                                                                                                                                                                                                                                                                                                                                                                                                                                                                                                                                                                                                                                                                                                                                                                                                                                                                                                                                                                                                                                                                                                                                                                                                                                                                                                                                                                                                                                                                                                                                                                                                               |
| Have you included all the information                                                                                                                                                                                                                                                            |                                                                                                                                                                                                                                                                                                                                                                                                                                                                                                                                                                                                                                                                                                                                                                                                                                                                                                                                                                                                                                                                                                                                                                                                                                                                                                                                                                                                                                                                                                                                                                                                                                                                                                                                                                                                                                                                                                                                                                                                                                                                                                                               |

|                                                                                                                                                                                                                                                                                                                                                                                                                                                                                                                                                         |            |
|---------------------------------------------------------------------------------------------------------------------------------------------------------------------------------------------------------------------------------------------------------------------------------------------------------------------------------------------------------------------------------------------------------------------------------------------------------------------------------------------------------------------------------------------------------|------------|
| <p>requested in your manuscript?</p>                                                                                                                                                                                                                                                                                                                                                                                                                                                                                                                    |            |
| <p><b>Resources</b></p> <p>A description of all resources used, including antibodies, cell lines, animals and software tools, with enough information to allow them to be uniquely identified, should be included in the Methods section. Authors are strongly encouraged to cite <a href="#">Research Resource Identifiers</a> (RRIDs) for antibodies, model organisms and tools, where possible.</p> <p>Have you included the information requested as detailed in our <a href="#">Minimum Standards Reporting Checklist</a>?</p>                     | <p>Yes</p> |
| <p><b>Availability of data and materials</b></p> <p>All datasets and code on which the conclusions of the paper rely must be either included in your submission or deposited in <a href="#">publicly available repositories</a> (where available and ethically appropriate), referencing such data using a unique identifier in the references and in the “Availability of Data and Materials” section of your manuscript.</p> <p>Have you have met the above requirement as detailed in our <a href="#">Minimum Standards Reporting Checklist</a>?</p> | <p>Yes</p> |

[Click here to view linked References](#)

# PiGx: Reproducible genomics analysis pipelines with GNU Guix

Ricardo Wurmus<sup>1\*</sup>, Bora Uyar<sup>1\*</sup>, Brendan Osberg<sup>1\*</sup>, Vedran Franke<sup>1\*</sup>, Alexander Goddschan<sup>1\*</sup>, Katarzyna Wreczycka<sup>1</sup>, Jonathan Ronen<sup>1</sup>, Altuna Akalin<sup>1#</sup>

<sup>1</sup>The Bioinformatics Platform, The Berlin Institute for Medical Systems Biology, Max-Delbrück Center for Molecular Medicine, Robert-Rössle-Strasse 10, 13125 Berlin, Germany

\* Equal contributions

# Corresponding author (e-mail: [altuna.akalin@mdc-berlin.de](mailto:altuna.akalin@mdc-berlin.de))

ORCIDs: Bora Uyar: 0000-0002-3170-4890; Brendan Osberg: 0000-0002-9854-9901; Vedran Franke: 0000-0003-3606-6792 ; Alexander Goddschan: 0000-0003-3045-8234; Altuna Akalin: 0000-0002-0468-0117.

**Keywords:** Pipelines in genomics, reproducible software, functional package management, RNA-seq, single cell RNA-seq, ChIP-seq, Bisulfite-seq, differential expression, differential binding, differential methylation.

# Abstract

In bioinformatics, as well as other computationally-intensive research fields, there is a need for workflows that can reliably produce consistent output, from known sources, independent of the software environment or configuration settings of the machine on which they are executed. Indeed, this is essential for controlled comparison between different observations or for the wider dissemination of workflows. Providing this type of reproducibility and traceability, however, is often complicated by the need to accommodate the myriad dependencies included in a larger body of software, each of which generally come in various versions. Moreover, in many fields (bioinformatics being a prime example), these versions are subject to continual change due to rapidly evolving technologies, further complicating problems related to reproducibility. Here, we propose a principled approach for building analysis pipelines and managing their dependencies with GNU Guix. As a case study to demonstrate the utility of our approach, we present a set of highly reproducible pipelines called PiGx for the analysis of RNA-seq, ChIP-seq, Bisulfite-seq, and single-cell RNA-seq. All pipelines process raw experimental data, and generate reports containing publication-ready plots and figures, with interactive report elements and standard observables. Users may install these highly reproducible packages and apply them to their own datasets without any special computational expertise beyond the use of the command line. We hope such a toolkit will provide immediate benefit to laboratory workers wishing to process their own data sets or bioinformaticians seeking to automate all, or parts of, their analyses. In the long term, we hope our approach to reproducibility will serve as a blueprint for reproducible workflows in other areas. Our pipelines, along with their corresponding documentation and sample reports, are available at <http://bioinformatics.mdc-berlin.de/pigx>

# Introduction

Reproducibility of scientific workflows is a ubiquitous problem in science, and is particularly problematic in areas that depend heavily on computation and data analysis (see (Peng 2011)). For such work it is essential that installed software is identical to versions used in publication, and directly traceable to a well-defined set of source packages in order to facilitate the reproduction of published data and the controlled manipulation of these software systems. Unfortunately, this goal is often unattainable for a variety of related reasons: Research-oriented software may be hard to build and install due to unsatisfiable dependency constraints; non-trivial software may yield different results when built or used with different versions or variants of declared dependencies; on workstations and shared High Performance Computing (HPC) systems alike, it may be undesirable or even impossible to comply with version and variant requirements due to software deployment limitations. Moreover, It is unrealistic to expect users to manually recreate environments that match the system and binary substrate on which the software was developed. In the field of bioinformatics the above problem is exacerbated by the fact that data production technology moves extremely fast; existing software and data analysis workflows require frequent updates. Thus, it is paramount that multiple versions and variants of the same software can be automatically built, in order to ensure reproducibility of projects that are either in-progress, or are already published. Moreover, bioinformatics workflows are increasingly being applied to potentially sensitive medical data from research participants. For the sake of data security, then, it is important that researchers know exactly what sources are being used in an application in order to minimize the risk of code that might (either maliciously or inadvertently) compromise confidentiality (Shu 2017). Thus, bioinformatics represents a field where there is a need for both reproducibility, and *referential transparency* (i.e. traceability to original software sources).

An important related issue is the reproducibility of workflows and pipelines across different machines. In addition to bioinformatics, many scientific fields require the researcher to prototype their code on local workstations with a custom software stack, and then later run it on shared HPC clusters for large data sets. The researcher must then be able to recreate their local environment on the cluster to ensure identical behavior. All of these concerns add to the burden on scientists, and valuable time that could be spent on research is wasted accommodating the limitations of system administration practices to ensure reproducibility. Even worse, reproducibility failures can be overlooked amid this complication, and publications could be accompanied with irreproducible analysis workflows or software. For these reasons, the scientific community in general -and fast evolving fields like bioinformatics in particular- need reliable and reproducible software package management systems.

In recent years, several tools have gained popularity among software developers and system administrators for wrapping Linux kernel features to accomplish process isolation, bind mounts, and user namespaces, or to deploy services in isolated environments (also called “containers”). Examples of such tools include: Docker, Singularity, and lxc. These tools are sometimes also proposed as solutions to the reproducibility problem (Peng 2011; Boettiger 2015), because they provide a way to ship an application alongside all of its runtime dependencies. This approach

1  
2  
3  
4 necessitates the use of file system images that are modified using imperative statements, e.g. to  
5 run a package manager inside a namespace, with the goal of embedding all dependencies in an  
6 opaque binary image.  
7

8  
9 Such images, however, offer no indication as to the sources from which their contents originate.  
10 Although contributors following best practices will generally declare their dependencies, with  
11 many contributors, and inevitable human error, it can often become difficult to confidently  
12 ascertain the full contents of an opaque binary bundle. Software deployment inside of the  
13 container is still subject to the well-known limitations of traditional package managers, such as  
14 intractable stateful behavior, time-dependent installation results, the inability to install and  
15 control more than a handful of application- or library- variants of packages on the same system,  
16 to name a few. Some of these limitations can partially be worked around by following strict  
17 policies such as operating version-controlled mirrors of all upstream package repositories.  
18 However, these policies are not enforced by container systems like Docker. Rather, they only  
19 shift the problem of reproducibility from the package level to the level of binary disk images, a  
20 rather less useful level of abstraction.  
21

22 Functional package management (Dolstra, 2004), on the other hand, embeds the complete  
23 dependency graph and configuration space into the construction of the package itself. This  
24 approach allows for referential transparency in addition to bit-for-bit build reproducibility. Other  
25 package and environment managers (such as Conda, EasyBuild, or Spack) leave out this  
26 information to varying degrees, and rely on tacit assumptions about the deployment- and build-  
27 environments.  
28

29 For the above reasons, we propose functional package management as implemented in GNU  
30 Guix (Courtès, 2015) as a way to implement workflow systems. To demonstrate the feasibility of  
31 this approach, we created a set of analysis tools (or 'pipelines') for common genomics analysis  
32 data sets: RNA-seq, ChIP-seq, BS-seq and scRNA-seq (for the sequencing of RNA, Chromatin  
33 Immunoprecipitation, Bisulfite-treated DNA, and single-cell resolution RNA, respectively). Each  
34 pipeline has a complex and large graph of dependencies, and each graph is comprehensively  
35 declared as a GNU Guix package definition; the graph is then built reproducibly by relying on  
36 Guix package manager features. Note that these pipelines also represent production-level  
37 pipeline tools, rather than simply model examples -they come with a full set of features including  
38 alignment, quality checking control, quantification, assay specific analysis and HTML reports.  
39 This set of pipelines is referred to, collectively, with the acronym PiGx (for **P**ipelines in  
40 **G**enomics<sup>1</sup>) --pronounced "pigs".  
41  
42  
43  
44  
45  
46  
47  
48  
49  
50  
51

## 52 Results

### 53 Pipeline design and implementation philosophy

---

54  
55  
56  
57  
58  
59 <sup>1</sup> The trailing x serves primarily as an aid to search-specificity, and denotes implementation  
60 using Guix)  
61  
62  
63  
64  
65

1  
2  
3  
4 PiGx was designed with special focus on several key features: namely, that they be 1) easy to  
5 use, 2) easy to install, 3) easy to distribute, 4) reproducible and 5) referentially transparent,  
6 many of which are inter-related constraints. Care was taken to ensure that all of the pipelines  
7 have a similar interface, so that familiarity with one pipeline would make for a gentler learning  
8 curve in using the others. For the end-user, each pipeline has the same input types: a sample  
9 sheet and a settings file. The sample sheet contains information about samples (such as  
10 names, labels, covariates etc.) The settings file contains extra arguments related to the  
11 execution of the pipelines. The users can generally run pipelines as follows:

```
12 pigx [pipeline_name] [sample_sheet] -s [settings_file]
```

13 where [pipeline\_name] can refer to any of the four pipelines: “rnaseq”, “chipseq”, “bsseq”, or  
14 “scrnaseq”. The resulting output provided to the users includes high quality reports and figures  
15 containing a standard set of results from basic analyses and data quality checks. Where  
16 appropriate, reports also contain certain interactive elements.  
17  
18  
19  
20  
21

22 In implementing this toolset, one of our first design choices was to use a conventional build  
23 system, the GNU Autotools suite, to configure and build the pipelines as if they were first-class  
24 software packages in their own right rather than a mere collection of tools and “glue code”.  
25 Instead of assuming that a user will provide a suitable environment *at runtime*, the use of a build  
26 system allows us to capture the software environment *at configuration time*. This is achieved by  
27 explicitly checking for the presence of required tools in the build environment and recording their  
28 exact location in the pipeline's configuration file. At runtime, the pipeline refers only to tools  
29 through the configuration file and does not assume the availability of dependent software in the  
30 global environment. Moreover, using a well-established build system makes it easy to package  
31 the pipelines for any package manager. We chose GNU Autotools over other build systems for  
32 two reasons: it does not require users to have a copy of the build system software as it compiles  
33 to shell code (which is highly portable), and it has been established long enough to implement a  
34 conventional and flexible build interface with well-known behavior even in somewhat unusual  
35 circumstances, such as the installation of files into unique prefixes as is done when building with  
36 GNU Guix.  
37  
38  
39  
40  
41  
42

43 Capturing the build-time environment alone is not enough to ensure reproducibility, nor is the  
44 use of a build system sufficient to make installation easy. Thus, our second design choice was  
45 to package the pipelines for the GNU Guix package manager. Like other user-level package  
46 managers such as Conda or EasyBuild, GNU Guix allows users to install, upgrade and remove  
47 software without having to know the details of dependencies or the build procedure. Unlike  
48 traditional package managers, however, GNU Guix takes a declarative approach to software  
49 environments called functional package management. This approach takes into account the  
50 complete graph of dependencies and build-time configurations, and maximizes build  
51 reproducibility by building binaries in isolated environments. Packages are installed into  
52 directories with unique prefixes that are computed from the dependency graph, allowing for the  
53 simultaneous installation of different versions or variants of applications and libraries. With  
54 functional package management, a given software build will generally yield bit-identical files  
55 when the build is performed on different machines or on the same machine at different points in  
56  
57  
58  
59  
60  
61  
62  
63  
64  
65



1  
2  
3  
4 time, independent of the current state of the system (caveats to this generalization are  
5 discussed below).  
6

7  
8 We consider software reproducibility an important asset in controlled experimentation.  
9 Reproducing a software environment bit for bit is not a goal in itself, but it provides us with a  
10 foundation upon which we can perform precise changes to the environment and assess the  
11 impact of these changes. Without bit-for-bit reproducibility we cannot be certain of the nature  
12 and impact of differences in the software environment. While virtual machines or binary  
13 application bundles such as Docker images would be sufficient to freeze the state of our  
14 software environment, relying on these tools would forgo the ability to recreate that same  
15 environment from scratch; nor would it be possible to analyze the environment at the level of  
16 software packages. The approach of functional package management as implemented in GNU  
17 Guix preserves the relationships between software packages and ensures that differences to  
18 the environment can be accounted for.  
19  
20  
21  
22

23 A further design choice remained regarding the workflow management system, which would  
24 execute a series of tasks mostly in the form of scripts from different programming languages.  
25 For this purpose, we used SnakeMake (Köster and Rahmann 2012), which provides target-  
26 driven execution infrastructure similar to GNU Make but with Python syntax, along with useful  
27 features such as parallel execution on HPC scheduling systems. We would like to emphasize,  
28 however, that this choice of workflow management system was made purely to facilitate ease of  
29 development and acceptance within the bioinformatics community, where the Python  
30 programming language is well-established. The different pipeline stages are implemented with a  
31 workflow management system stitching together various bioinformatics tools; they are made  
32 configurable with the GNU Autotools and packaged with GNU Guix. This means they will be  
33 almost fully (see below) build-reproducible and can be installed via the one-liner:  
34  
35  
36  
37

```
38 guix package --install pigx.  
39  
40  
41  
42
```

## 43 **RNA-seq pipeline**

### 44 **General Description of PiGx-RNA-seq Pipeline**

45  
46 PiGx RNA-seq provides an end-to-end preprocessing and analysis pipeline for RNA-seq  
47 experiments. The pipeline takes a set of raw fastq read files and the experimental design as  
48 described by the user, and produces differential expression reports with figures and tables of  
49 differentially expressed genes, as well as gene ontology (GO) term analysis thereof.  
50  
51 Furthermore, it provides quality control reports about the experiment. To use the pipeline, the  
52 user must provide two files: the sample sheet describing the samples and corresponding fastq  
53 files, and a settings file with configuration parameters related to the pipeline's execution. The  
54 settings file lists, among other things, the location of a reference genome for alignment, a GTF  
55 file with genome annotations, and a transcriptome reference, as well as a list of desired  
56 differential expression analyses to be performed, specifying which samples to use as cases and  
57  
58  
59  
60  
61  
62  
63  
64  
65

controls --see package documentation here [http://bioinformatics.mdc-berlin.de/pigx\\_docs/pigx-rna-seq.html](http://bioinformatics.mdc-berlin.de/pigx_docs/pigx-rna-seq.html) for more details.

The pipeline can then be run with the command

```
 pigx rnaseq [sample_sheet] -s [settings_file], to generate the output through several intermediate steps (see figure 1).
```

PiGx RNA-seq uses the reference genome and transcriptome provided by the user to produce indices using *STAR* (Dobin et al. 2013) and *Salmon* (Patro et al. 2017) respectively. It then uses *Trim Galore!* (Babraham 2018b) to trim low quality reads and remove adapter sequences before aligning the reads to the reference using *STAR*. At this point, PiGx RNA-seq uses *fastqc* (Babraham 2018a) and *MultiQC* (Ewels et al. 2016) to generate comprehensive quality control reports of the sequencing, trimming, and alignment steps. PiGx RNA-seq also uses *BEDTools* (Quinlan and Hall 2010) to compute the depth of coverage in the experiment and outputs convenient bedgraph files. Gene expression quantification is obtained from *STAR*, and transcript level quantification using *Salmon*. The gene expression count matrix is then used to run differential expression analyses as specified by the user, using *DESeq2* (Love, Huber, and Anders 2014) for statistical analysis and *g:ProfileR* (Reimand et al. 2007) for GO term analysis. Each differential expression analysis produces a self-contained HTML report.

The differential expression reports produced are comprehensive, including sortable tables for differentially expressed genes for a detailed view, principal component analysis plots for a birds-eye view of the experiment, as well as MA and volcano plots. In addition, the reports include a section with GO term enrichment analysis.

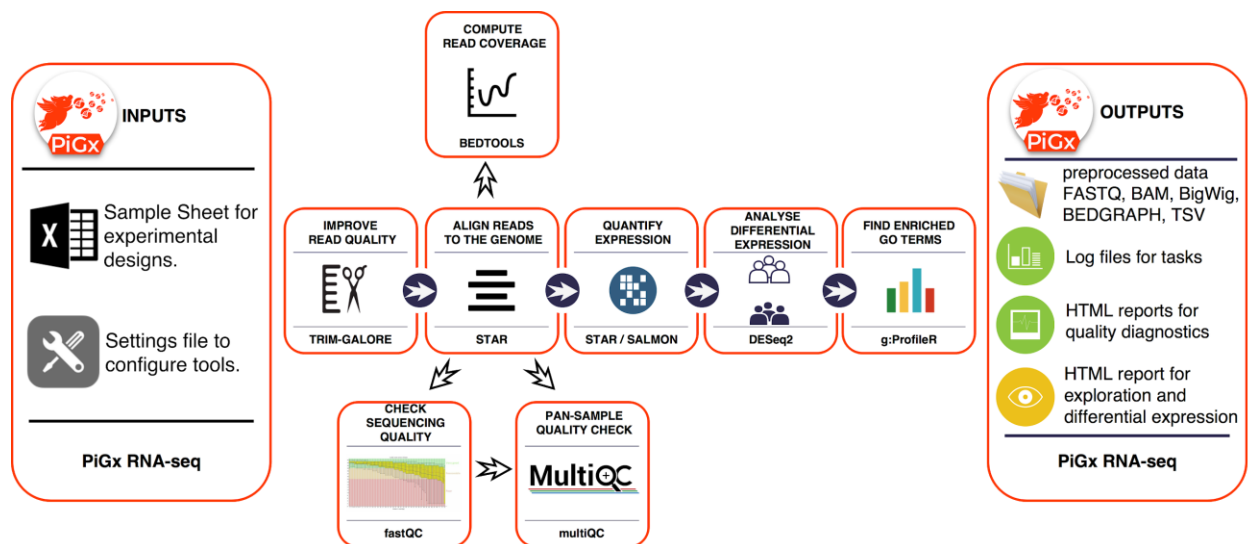

Figure 1

Workflow diagram of the PiGx-RNA-seq pipeline.

## RNA-seq Use Case

The study by Hon *et al.* (2014) is motivated by several observations: DNA methyl-transferases (DNMTs) are the major mediators of cytosine methylation (producing 5-methyl-cytosine). 5hmC (5-hydroxy-methyl-cytosine) is a product of oxidation of 5mC's, and the TET family of proteins mediate 5mC oxidation. It has been established that DNA demethylation consists of the sequence of chemical reactions that convert 5mC into 5hmC, which is subsequently converted into 5fC (5-formyl-cytosine) and 5caC (5-carboxyl-cytosine). Active enhancers are depleted for 5mC but are enriched for 5hmC marks (Rampal *et al.* 2014), suggesting that an interplay between DNMTs and TET proteins could determine the activity level of enhancers. Mutating DNMTs or TET proteins in mouse embryonic stem cells (mESCs) perturbs global DNA methylation status, however cells do not lose the ability to regenerate. Moreover, mutating TET proteins and perturbing the oxidation levels have previously been shown to skew the differentiation of mESCs. Based on these facts, the authors address the following question: Can the skewed differentiation in mESCs be explained by deregulated balance of 5mC / 5hmC levels at active enhancers following the loss of activity of TET proteins?

The authors of the above study use TAB-Seq, Bisulfite-Seq, ChIP-seq and RNA-seq methods to profile genome-wide methylation, demethylation, histone modifications and gene expression levels to address these questions. They find that *Tet2* has the biggest role in enhancer demethylation in mESCs. Deletion of *Tet2* leads to enhancer hypermethylation, which in turn reduces enhancer activity. The reduced enhancer activity leads to a disruption in the activation of more than 300 genes in the early stages of differentiation, however the activity levels of these genes are restored to wild-type levels at the later stages of differentiation. Reduced enhancer activity followed by delayed gene activation explains the skew observed in mESC differentiation.

The authors of the above study profile the transcriptomes of mESCs as they differentiate into neural progenitor cells (NPCs) within a six day period. They quantify gene expression levels of wild-type, *Tet1* *-/-* and *Tet2* *-/-* cells on day zero, day three, and day six and sequenced two biological replicates per sample. Thus, they obtained 18 samples in total (3 genotypes x 2 replicates x 3 days). In figure 5 of the original manuscript, the authors summarise the results of the RNA-seq analysis. Here, we use the PiGx-RNA-seq pipeline to pre-process the raw fastq files downloaded from the GEO archive (GEO accession: GSE48519), map the reads to the *Mus musculus* genome (GRCM38 (mm10) build), and finally quantify the expression levels of genes using both Salmon (Patro *et al.* 2017) and STAR (Dobin *et al.* 2013). We then use DESeq2 (Love, Huber, and Anders 2014) to perform multiple differential expression analyses as described in the original publication. Based on the processed and normalized count tables and differential expression analysis results produced by the PiGx pipeline, we have written a small custom script to reproduce the panels in figure 5 of Hon *et al.* In order to reproduce this figure, we needed to perform seven differential expression analyses as described in Table 1. HTML reports for each differential expression analysis (based on read counts computing using STAR) can be found here: <http://bioinformatics.mdc-berlin.de/pigx/supplementary-materials.html>.

| Analysis        | Case Sample  | Control Sample | Description                                                                                          |
|-----------------|--------------|----------------|------------------------------------------------------------------------------------------------------|
| tet2_diff_day3  | day3_tet2_KO | day0_tet2_KO   | <i>Tet2</i> <sup>-/-</sup> cells on day 3 are compared to <i>Tet2</i> <sup>-/-</sup> cells on day 0. |
| tet2_diff_day6  | day6_tet2_KO | day0_tet2_KO   | <i>Tet2</i> <sup>-/-</sup> cells on day 6 are compared to <i>Tet2</i> <sup>-/-</sup> cells on day 0. |
| WT_diff_day3    | day3_WT      | day0_WT        | Wild-type cells on day 3 are compared to wild-type cells on day 0.                                   |
| WT_diff_day6    | day6_WT      | day0_WT        | Wild-type cells on day 6 are compared to wild-type cells on day 0.                                   |
| tet2_vs_WT_day0 | day0_tet2_KO | day0_WT        | <i>Tet2</i> <sup>-/-</sup> cells on day 0 are compared to wild-type cells on day 0.                  |
| tet2_vs_WT_day3 | day3_tet2_KO | day3_WT        | <i>Tet2</i> <sup>-/-</sup> cells on day 3 are compared to wild-type cells on day 3.                  |
| tet2_vs_WT_day6 | day6_tet2_KO | day6_WT        | <i>Tet2</i> <sup>-/-</sup> cells on day 6 are compared to wild-type cells on day 6.                  |

Table 1

Differential expression analyses performed by PiGx-RNA-seq.

Having performed the above analysis, we first took a global look at how all sequenced samples cluster. Using a table of TPM (transcripts per million reads) counts generated by Salmon at the gene level, we selected the top 100 most variable genes and plotted a heatmap of all the samples using pheatmap package (Kolde 2018). We observed that the samples mainly cluster by the differentiation stage rather than genotype, which confirms the authors' findings (figure 2A). Next, again using the same TPM counts table, we plotted the expression levels of a select list of genes (*Nes6*, *Pax6*, *Sox1*, *Tet1*, *Tet2*, *Tet3*, *Slit3*, *Lmo4*, *Irx3*) on day 0, day 3, and day 6 (figure 2B). The changes in the expression levels of these genes perfectly match the patterns as described by Hon et al. At this point the authors recognise that some neural marker genes such as *slit3* and *lmo4* show discordant expression patterns between WT and *Tet2* <sup>-/-</sup> samples particularly on day 3, which are restored back to WT levels on day 6. The authors then investigated whether such a delayed induction mechanism can be observed globally. It was shown that the percentage of genes that are differentially expressed in both *Tet2* <sup>-/-</sup> and WT cells (compared to the undifferentiated samples of the corresponding genotypes on day 0), is significantly higher on day 6 than on day 3. We also observe a similar pattern, however the

1  
2  
3  
4 difference we observe is somewhat reduced. Our findings are reproduced based on gene  
5 counts quantified by both STAR and Salmon (figure 2C).

6  
7 In figure 5F of the original publication, the authors take a closer look into the list of discordantly  
8 induced genes on day 3 in *Tet2* *-/-* samples. There it is shown that the majority of the genes that  
9 get induced in WT samples by day 3, don't get induced in the *Tet2* *-/-* samples as highly as they  
10 do in the WT samples. On the other hand, these numbers are comparable on day 6. We also  
11 observe the same difference and reproduce the findings using both Salmon and STAR-based  
12 gene counts (figure 2D). This suggests that there must be a list of genes that get activated in  
13 WT, but lag behind in *Tet2* *-/-* samples at the early stage of differentiation, however they catch  
14 up later with the WT levels. The authors call these genes '*delayed induction genes*' and find 333  
15 genes that fit such a description. In figure 5G, the authors show the relative expression of these  
16 genes in *Tet2* *-/-* samples compared to WT samples throughout differentiation and compare it to  
17 the remaining list of genes in the genome. We have successfully reproduced the same patterns  
18 based on 357 delayed induction genes detected by Salmon-based gene counts (282 genes  
19 detected by STAR-based gene counts) (Figure 2E). In figure 5H, the authors show the most  
20 significant GO terms enriched for the delayed induction genes. Although we don't observe the  
21 same set of terms as reported by the authors, we found seven development-related GO terms  
22 including 'tissue development' and 'nervous system development' as enriched terms (figure 2F).  
23  
24  
25  
26  
27  
28  
29  
30  
31  
32  
33  
34  
35  
36  
37  
38  
39  
40  
41  
42  
43  
44  
45  
46  
47  
48  
49  
50  
51  
52  
53  
54  
55  
56  
57  
58  
59  
60  
61  
62  
63  
64  
65

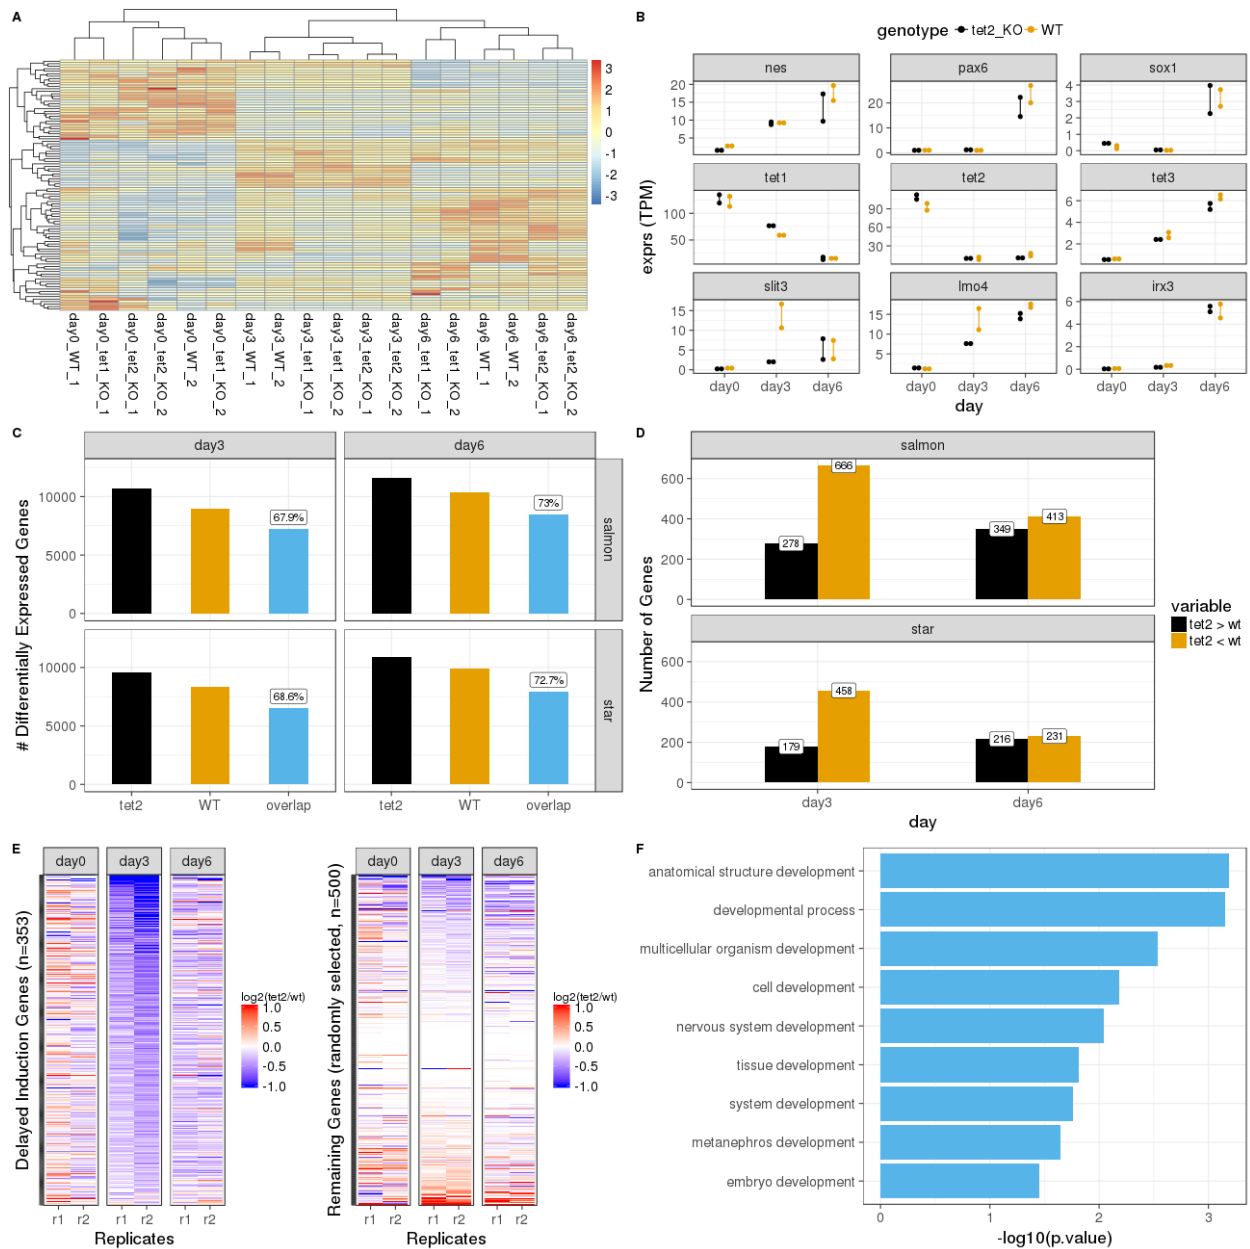

Figure 2

Reproduction of figure 5 from (Hon et al. 2014) using datasets processed by PiGx-RNA-seq pipeline. **A**) Hierarchically clustered heatmap of the top 100 most variable genes across all samples (transcripts per million (TPM) aggregated on the gene level, produced with Salmon). Each row represents a gene and each column represents a sequenced sample (See Table 1 for descriptions of the samples). The expression values are scaled by 'row'. **B**) Changes in the expression levels of a selected list of genes throughout differentiation period on day 0, day 3, and day 6. The y-axis shows the normalised expression levels (TPM at gene-level). The expression patterns of samples with *Tet2*<sup>-/-</sup> background are depicted in black and wild type background in orange. **C**) Abundance of differentially expressed genes (adjusted p-value < 0.1) (on y-axis) when comparing samples on day 3 or day 6 with the samples on day 0 with

1  
2  
3  
4 corresponding genotypes (*Tet2* *-/-* or wild-type). The bar labeled 'overlap' represents the  
5 number of differentially expressed genes in both genotypes. The percentage is calculated by  
6 dividing the value of 'overlap' with the value of *Tet2* . The results are reproduced by both  
7 Salmon-based gene-level read counts (top row) and STAR-based gene-level read counts  
8 (bottom row). **D**) Genes that are up-regulated (induced) in wild-type samples on day 3 (or day 6)  
9 compared to wild-type samples on day 0, are intersected with genes that are differentially  
10 expressed between wild-type samples and *Tet2* *-/-* samples at the same stage of differentiation,  
11 and classified as '*Tet2* > wt' (the gene is up-regulated in the *Tet2* *-/-* sample more so than in the  
12 wild-type sample) or '*Tet2* < wt' (the gene is upregulated in *Tet2* *-/-* sample less than in the wild-  
13 type sample). The plot is reproduced using both Salmon-based gene counts and STAR-based  
14 gene counts. **E**) Heatmaps for delayed induction genes (on the left) and 500 genes randomly  
15 selected from the remainder (on the right). The colors of the heatmap represent the log<sub>2</sub> scale  
16 ratio of normalised expression value (gene-level TPM counts obtained using Salmon) of each  
17 delayed induction gene between *Tet2* *-/-* sample and the wild-type sample of the corresponding  
18 replicates (r1: replicate-1, r2: replicate-2) on the corresponding stages of differentiation (day 0,  
19 day 3, and day 6). The rows of the heatmap are ordered in increasing order based on the  
20 average values of the two replicates on day 3. The color scales range between -1 and 1 before  
21 reaching saturation. **F**) Top GO terms for biological processes (on the y-axis) enriched among  
22 the delayed induction genes. The GO terms are detected using g:ProfileR tool (Reimand 2016).  
23 The resulting terms are filtered for p-value<0.05 and further filtered for the keyword  
24 'development'. On the x-axis, the p-values are depicted at log<sub>10</sub> scale.  
25  
26  
27  
28  
29  
30  
31  
32  
33  
34

## 35 **ChIP-seq pipeline**

### 36 **General Description of PiGx-ChIP-seq Pipeline**

37  
38  
39  
40  
41 PiGx ChIP-seq is an end-to-end processing and analysis pipeline for ChIP-seq experiments.  
42 From the input fastq files, the pipeline produces sequencing quality control, ChIP quality control,  
43 peak calling, and IDR (Q. Li *et al.* 2011) estimation. PiGx ChIP-seq also prepares the data for  
44 visualization in a genome browser. The pipeline execution is highly customizable - the user can  
45 specify which parts of the pipeline to execute, and which parameter settings to use. As in the  
46 other pipelines, to use PiGx ChIP-seq, the user must provide two files: a sample sheet  
47 containing the names of the fastq files with a descriptive label, and a settings file. The settings  
48 file contains the locations of the reference genome, and the GTF file with genome annotations,  
49 as well as a list of configurations for each executable step. Upon completion, the user is  
50 provided with quality reports, and all of the pre-processed data, which substantially facilitates  
51 downstream analysis and visualization.  
52  
53  
54  
55

56  
57 The pipeline can then be run with the command:

```
58 pigx chipseq [sample_sheet] -s [settings_file]
```

59  
60  
61  
62  
63  
64  
65

PiGx ChIP-seq pipeline aligns the reads to the genome using *Bowtie2* (Langmead and Salzberg 2012), does peak calling using *MACS2* (Zhang et al. 2008), calculates the irreproducibility rate and outputs a series of quality statistics, such as: GC content, strand cross correlation, distribution of reads and peaks over annotated genomic features, and clustering of samples based on their similarity (Landt et al. 2012). The pipeline also produces UCSC Track hubs to facilitate exploration of the dataset. The purpose of the pipeline is to improve the routine processing steps for ChIP-seq experiments and enable the user to focus on data quality control and biologically relevant data exploration. The pipeline heavily depends on Bioconductor (Huber *et al.* 2015) packages such as *GenomicRanges* (Lawrence et al. 2013) and *Genomation* (Akalin *et al.* 2015) for annotating peaks and summarizing ChIP-seq scores over regions of interest.

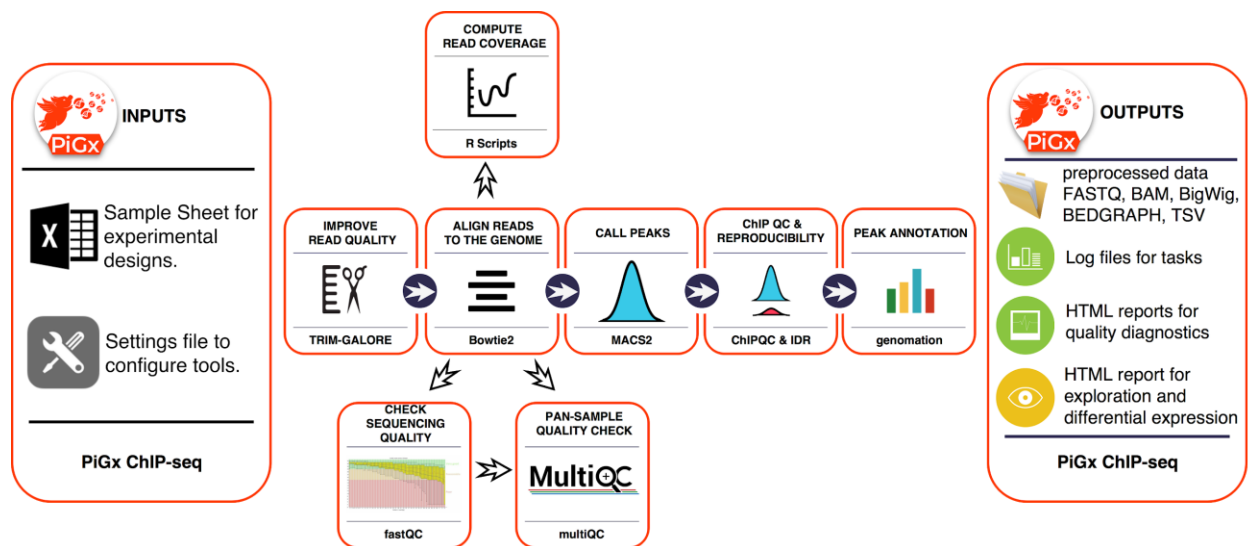

Figure 3  
Workflow diagram for ChIP-seq pipeline

### ChIP-seq Use Case

For consistency, we applied the ChIP-seq pipeline to data from the same study as in the section “RNA-seq Use Case” above (Hon *et al.* 2014); for the biological underpinnings of this experiment, please see the description provided there. Figure 4 shows part of the ChIP-seq quality control output performed on untreated, wild type ChIP samples, of various activating and repressing histone marks, and the corresponding input samples. One standard procedure is to validate the consistency of results with known biological priors, in order to quickly find samples with outlying properties, and to discover batch effects. For example, figure 4A shows the expected clustering of repressive (H3k27me3, H3k9me3) and activating (H3k4me3, H3k4me1, H3k27ac, and H4k36ac) histone marks. Upon closer inspection, however, it becomes clear that the activating histone marks cluster by their corresponding *batches*, and not by their biological functionality.



1  
2  
3  
4  
5  
6  
7  
8  
9  
10  
11  
12  
13  
14  
15  
16  
17  
18  
19  
20  
21  
22  
23  
24  
25  
26  
27  
28  
29  
30  
31  
32  
33  
34  
35  
36  
37  
38  
39  
40  
41  
42  
43  
44  
45  
46  
47  
48  
49  
50  
51  
52  
53  
54  
55  
56  
57  
58  
59  
60  
61  
62  
63  
64  
65

Figure 4B shows the cross-correlation between the signal on the plus and minus genomic strands, shifted by a defined range (usually within a range of 1 - 400 nucleotides). The maximum intensity in each row indicates the average DNA fragment size in each corresponding ChIP experiment. Large discrepancies in the cross correlation profile, between experiments, can indicate problems with fragmentation, fixation, or chromatin immunoprecipitation. The figure shows that most of the samples have an average fragment size between 100 - 150 bp. One of the H3k27me3 replicates, however, shows an aberrant fragment size profile (second sample in the plot). Upon visual inspection, the sample had an extremely low signal to noise ratio and the peak calling resulted in zero enriched regions. Such samples should either be repeated or omitted from the downstream analysis.

Figure 4C represents the relationship between the GC content of one kilobase genomic bins and the ChIP signal; this plot is used as a diagnostics tool for enrichment of fragments with extreme nucleotide content (enrichment of fragments with GC content strongly deviating from the genomic mean), which can indicate problems with PCR-based fragment amplification, and chromatin immunoprecipitation.

Figure 4D represents the distribution of reads over functional genomic features. It is used to observe whether the experimental results conform to known expectations, based on previous experiments - i.e. H3k4me3 should show strong enrichment over transcription start sites, while the H3k36me3 should show an enrichment over exonic and intronic regions. Deviating results can indicate a weak precipitation of the targeted protein, or antibody cross-reactivity with unexpected epitopes. Figure 4 represents just a subset of quality control metrics implemented as a standard output from the PiGx ChIP-seq pipeline. The full set can be found here: <https://bioinformatics.mdc-berlin.de/pigx/supplementary-materials.html>

1  
2  
3  
4  
5  
6  
7  
8  
9  
10  
11  
12  
13  
14  
15  
16  
17  
18  
19  
20  
21  
22  
23  
24  
25  
26  
27  
28  
29  
30  
31  
32  
33  
34  
35  
36  
37  
38  
39  
40  
41  
42  
43  
44  
45  
46  
47  
48  
49  
50  
51  
52  
53  
54  
55  
56  
57  
58  
59  
60  
61  
62  
63  
64  
65

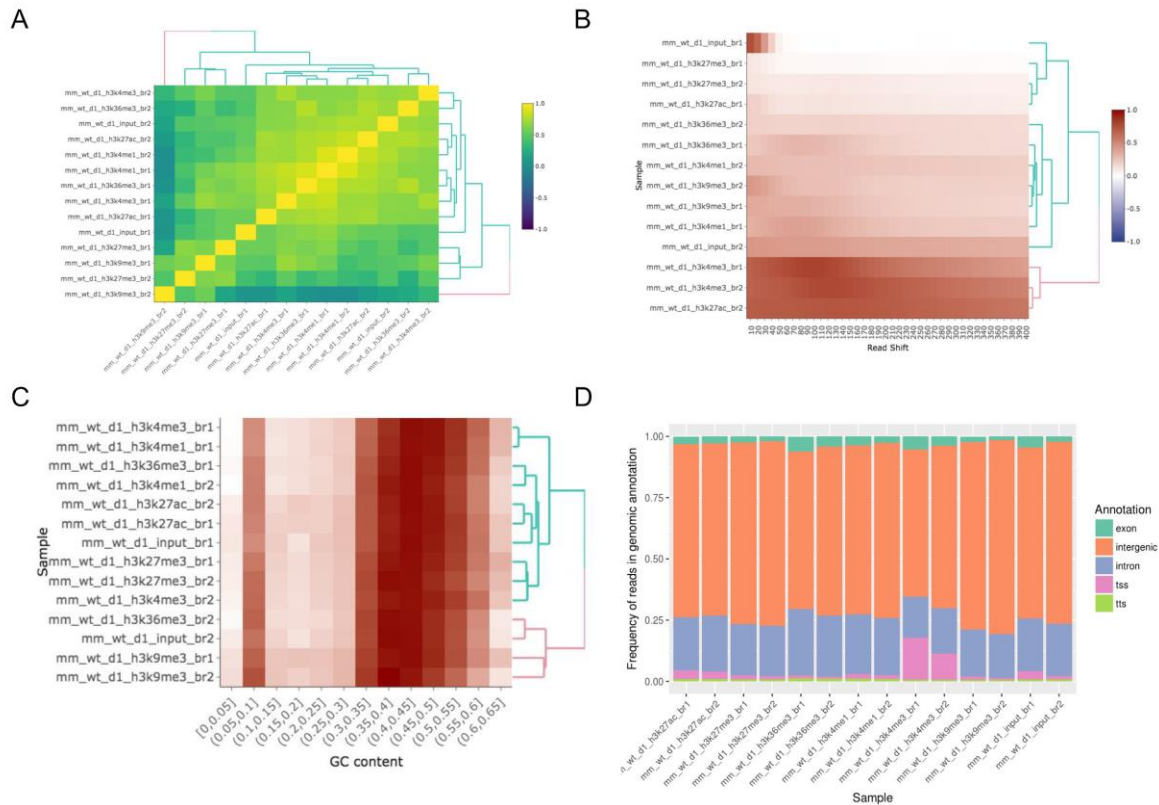

Figure 4

Example ChIP-seq quality control output. **A)** Clustering of samples based on correlation of normalized ChIP reads in one kilobase bins. **B)** Cross correlation between coverage profiles on Watson and Crick strands, shifted by the amount specified on the x axis. **C)** Relationship between read count and GC content in 1 kb bins. **D)** Distribution of reads in functional genomic features.

## BS-seq pipeline

### General description of the PiGx BS-seq pipeline

PiGx BS-seq is a bisulfite sequencing processing pipeline used to detect genome-wide methylation patterns and to perform differential methylation calling for case-control settings. It produces individual reports for each sample provided by the user, in addition to differential-methylation reports for arbitrarily many pairs of treatment conditions provided by the user. PiGx BS-seq uses *Trim Galore!* (Babraham 2018b) to trim reads for adapter sequences and quality, and *fastqc* (Babraham 2018a) for quality control (both before and after trimming). If necessary, PiGx BS-seq produces GA- and CT- converted versions of the reference genome for alignment, using *bismark\_genome\_preparation* (Krueger and Andrews 2011). Reads are then mapped to the reference using *Bowtie2* (Langmead and Salzberg 2012), before being sorted by location in

the genome and filtered for uniqueness using samtools (Krueger and Andrews 2011; H. Li *et al.* 2009). The corresponding reports and .bam files for each of these steps are saved to their respective directories.

As in the other pipelines, to use PiGx BS-seq, the user must provide two input files: a sample sheet containing the paths to the fastq files with a descriptive label, and a settings file. The pipeline is robust to paired-end or single-end input data, and processing of each case is initiated automatically, based on whether the user supplies only a single input file, or a pair of files, for a given sample. The settings file contains the locations of the reference genome, among other directories, as well as a list of configuration steps for each executable step. The pipeline can then be run with the command:

```
pigx bsseq [sample_sheet] -s [settings_file]
```

Post-mapping analysis steps performed automatically by PiGx BS-seq include tabulation of the fractional methylation of CpG sites, the segmentation of genomic methylation patterns across the genome, and the selection of differentially methylated sites between pairs of treatments provided in the settings file above. Furthermore, the final reports include genomic annotation of differentially methylated regions and methylome segments. A single execution of the pipeline can perform differential methylation analysis between a sample and arbitrarily many references; each comparison will have its own dedicated report, in addition to the final report for the sample itself. For traceability, direct links to input files, and various execution tools are saved directly within the output folder. Finally, a copy of the full methylome for each sample is also saved in BigWig (.bw) format, compatible with visualization in an online genome browser.

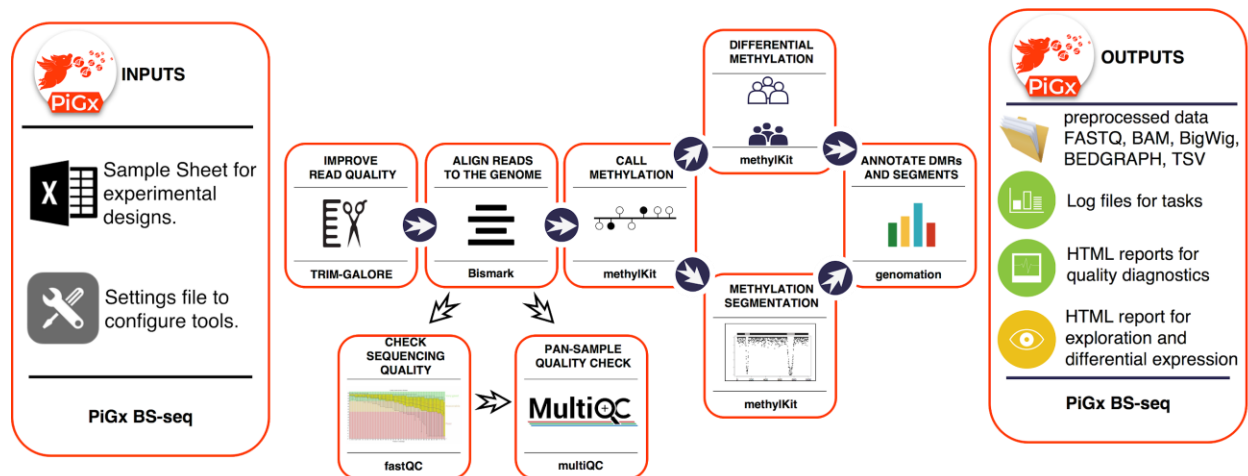

Figure 5  
Workflow diagram for PiGx BS-seq pipeline

## BS-seq Use Case

1  
2  
3  
4 We applied the BS-seq pipeline to data from embryonic stem cells in mice, comparing wild type  
5 and *Tet2* deletion experiments (accessions SRX317877, and SRX317883 respectively). These  
6 data sets derive from the same study as was used for controlled comparison in the section  
7 “RNA-seq Use Case” above (Hon *et al.* 2014); for a biological description of this experiment,  
8 please refer to that section. HTML reports for each of the performed analyses can be found  
9 here: <https://bioinformatics.mdc-berlin.de/pigx/supplementary-materials.html>  
10  
11

12  
13 Figure 6 shows a standard set of data analysis metrics generated automatically by the pipeline.  
14 For example, methylation levels near the promoter region of a list of annotated genes for each  
15 sample are shown in figures (A) and (B). For generality, figure 6 averages over all known genes,  
16 however the user may freely probe for more specific results by supplying any arbitrary set of  
17 genes under investigation (in the absence of such an annotation file, this figure is simply omitted  
18 from the final report). A coarse map of the genome is provided in (C), which, for some datasets,  
19 may serve to highlight differential methylation localized to particular regions or chromosomes. In  
20 this particular use-case it is more useful as a null control showing that these regions are  
21 uniformly distributed throughout the genome. In addition, a histogram for differential methylation  
22 status of CpGs throughout the genome is provided in (D) using the same colour-code as in (C).  
23 The methylation differences of hyper-methylated, hypo-methylated and non-differentially  
24 methylated CpGs are shown as histograms with the color-code as in Figure 6C. The latter is  
25 shown as a distribution of methylation differences deemed to be not statistically significant (in  
26 black), and since these are generally far more numerous than the former, the two curves are  
27 normalized independently. Note also that since these curves represent *relative* distributions, the  
28 vertical axis is of arbitrary units and tick marks are omitted. Finally, a screenshot of data-  
29 visualization from the genome browser (Robinson *et al.* 2011; Thorvaldsdóttir, Robinson, and  
30 Mesirov 2013) is provided in (E); here, regions of interest can be inspected manually at arbitrary  
31 precision.  
32  
33  
34  
35  
36  
37  
38  
39  
40  
41  
42  
43  
44  
45  
46  
47  
48  
49  
50  
51  
52  
53  
54  
55  
56  
57  
58  
59  
60  
61  
62  
63  
64  
65

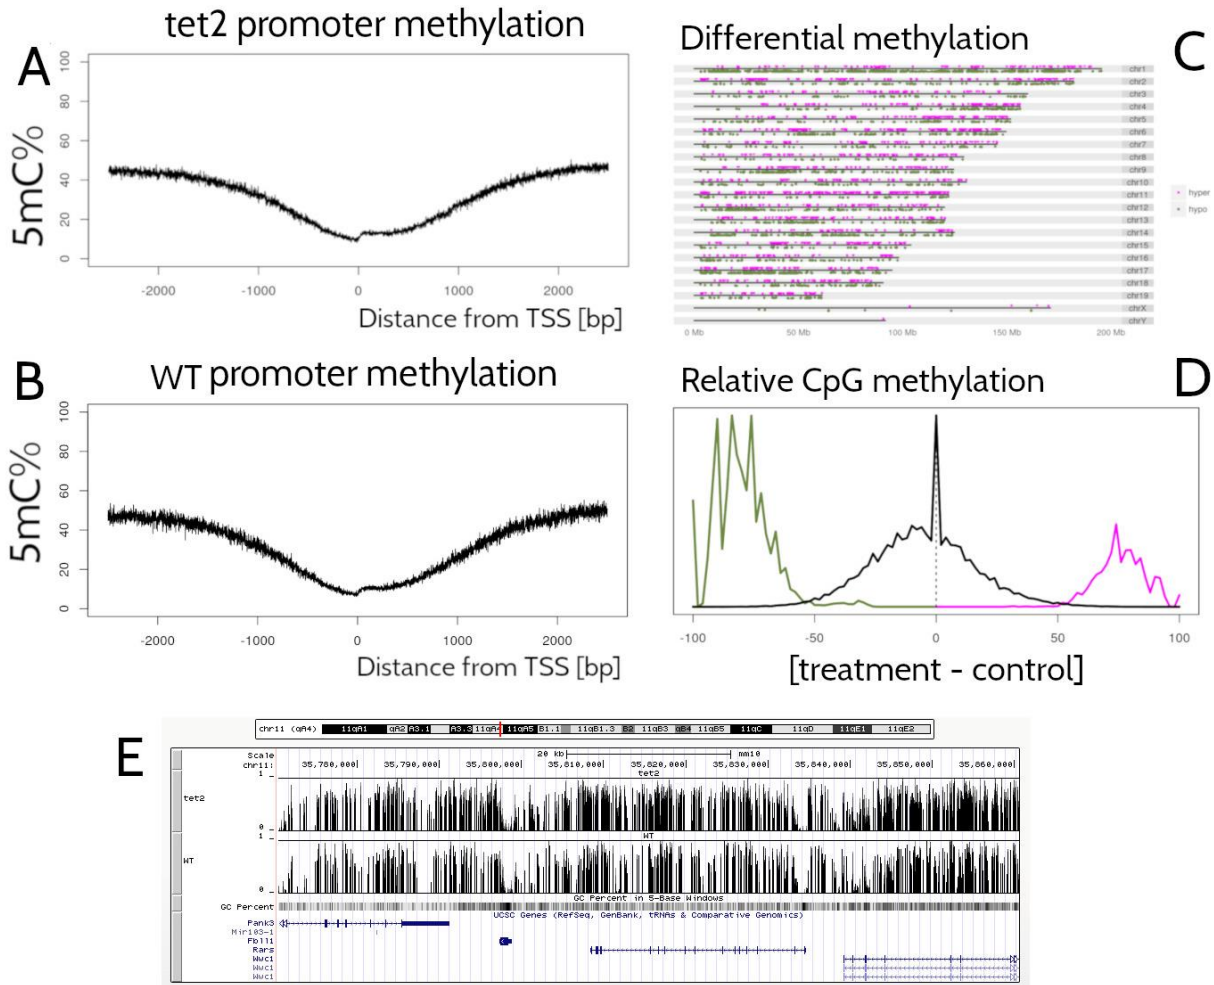

Figure 6

Output from the PiGx BS-seq pipeline. **(A,B)**: average CpG methylation throughout the promoter regions of the mm10 genome for *Tet2*  $-/-$  and WT, respectively, as a function of distance from TSS (in direction of transcription). **(C)** Whole-genome map of differentially methylated CpGs, with colour-code to indicate hyper- and hypo- methylation of the treatment (*Tet2*  $-/-$ ) relative to the control (Wild-type). **(D)** Histogram of the difference in average CpG methylation between *Tet2*  $-/-$  and wild-type. For differentially-methylated cytosines, colors are consistent with (C), while CpGs with statistically insignificant difference in methylation are provided in black. Normalization of these two curves is performed independently (since the latter are generally far more numerous than the former), and the graph conveys only relative proportions (thus, as the absolute y-axis is of arbitrary scale, units are omitted). **(E)** Screenshot of the genome browser using bigwig data from PiGx; here the data can be examined in much finer detail than in C).

# scRNA-seq pipeline

## General description of the PiGx scRNA-seq pipeline

Single cell RNA-seq is an extremely powerful technology, that is becoming increasingly prevalent in biological studies. The rapid development of UMI based methods, along with droplet based cell separation (Macosko et al. 2015; Klein et al. 2015), has enabled even simple experiments to quantify expression in several tens of thousand of cells. **PiGx scRNA-seq** is a pipeline for pre-processing of UMI based single-cell experiments. The purpose of the pipeline is to enable seamless integration and quality control of multiple single cell data sets. The pipeline works with minimal user input. As in the other pipelines, the user must provide a sample sheet with a basic experimental description, and a settings file which defines, among other parameters, the location of the input data and reference sequence and annotation. The pipeline can then be run with the command:

```
pigx scrnaseq [sample_sheet] -s [settings_file]
```

The pipeline does preliminary read processing, maps the reads with the STAR (Dobin et al. 2013) aligner, and assigns reads to gene models. It also separates cells from background barcodes (Alles et al. 2017), and constructs digital expression matrices for each sample (each saved in loom format); loom files from all samples are then merged into one large loom file using the loompy package (Linnarsson 2018). The expression data are subsequently processed into a SingleCellExperiment (Aaron Lun and Risso 2018) object. SingleCellExperiment is a Bioconductor class for storing expression values, along with the cell, and gene data, and experimental meta data in a single container. It is constructed on top of hdf5 file based arrays (Pagès 2018), which enables exploration even on systems with limited RAM (random access memory).

During the object construction, the pipeline performs expression normalization, dimensionality reduction, and identification of significantly variable genes. The pipeline then classifies cells by cell cycle phase and calculates the quality statistics. The SingleCellExperiment object contains all of the necessary data needed for further exploration. The object connects the PiGx pipeline with the Bioconductor single cell computing environment, and enables integration with state of the art statistical, and machine learning methods (scrn (A. T. L. Lun, McCarthy, and Marioni 2016), zinbwave (Risso et al. 2018), netSmooth (Ronen and Akalin 2018), iSEE (Aaron Lun et al. 2018), etc.).

The pipeline produces an HTML report containing quality controls, labeled by input covariates, which can be used for detecting batch effects.



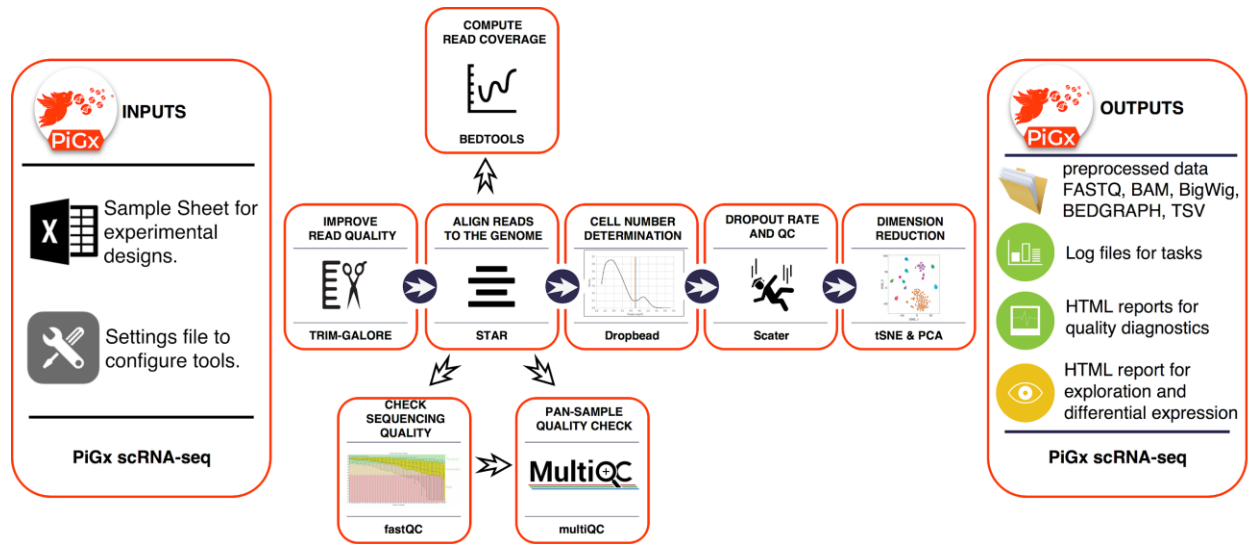

Figure 7  
Workflow diagram for PiGx-scRNA-seq pipeline.

## scRNA-seq Use Case

To showcase the capabilities of PiGx scRNA-seq, we ran the pipeline on isolated single nuclei from the mouse brain (Hu *et al.* 2017). In this study, the authors developed a gradient-based method for nucleus separation, and used it in combination with Drop-seq to profile the transcriptomes of more than 18,000 single nuclei. Figure 8 shows a part of the quality control output from the PiGx scRNA-seq pipeline. Figure 8A shows the per sample number of total and uniquely mapped reads. Figure 8B visualizes the cells on the first two principal components. The color gradient corresponds to the number of detected genes per cells. The figure shows that the total number of detected genes strongly correlates with the first two principal components. Figure 8C is analogous to figure 7B of the original publication, with the color scheme representing labeling each cell with its respective stage of the cell-cycle. Thus, figure 8C shows that the first two principal components correlate with the stage of the cell cycle. The heatmap in figure 8D shows scaled normalized expression values for genes that contribute the most to the first principle component. High read-count variability in a small number of genes drives the variation around the first principle component. The column-wise annotations show that the variation is driven mainly by cells in the G1 phase of the cell-cycle from the second biological replicate. The HTML report for this analysis can be accessed here:

<http://bioinformatics.mdc-berlin.de/piqx/supplementary-materials.html>

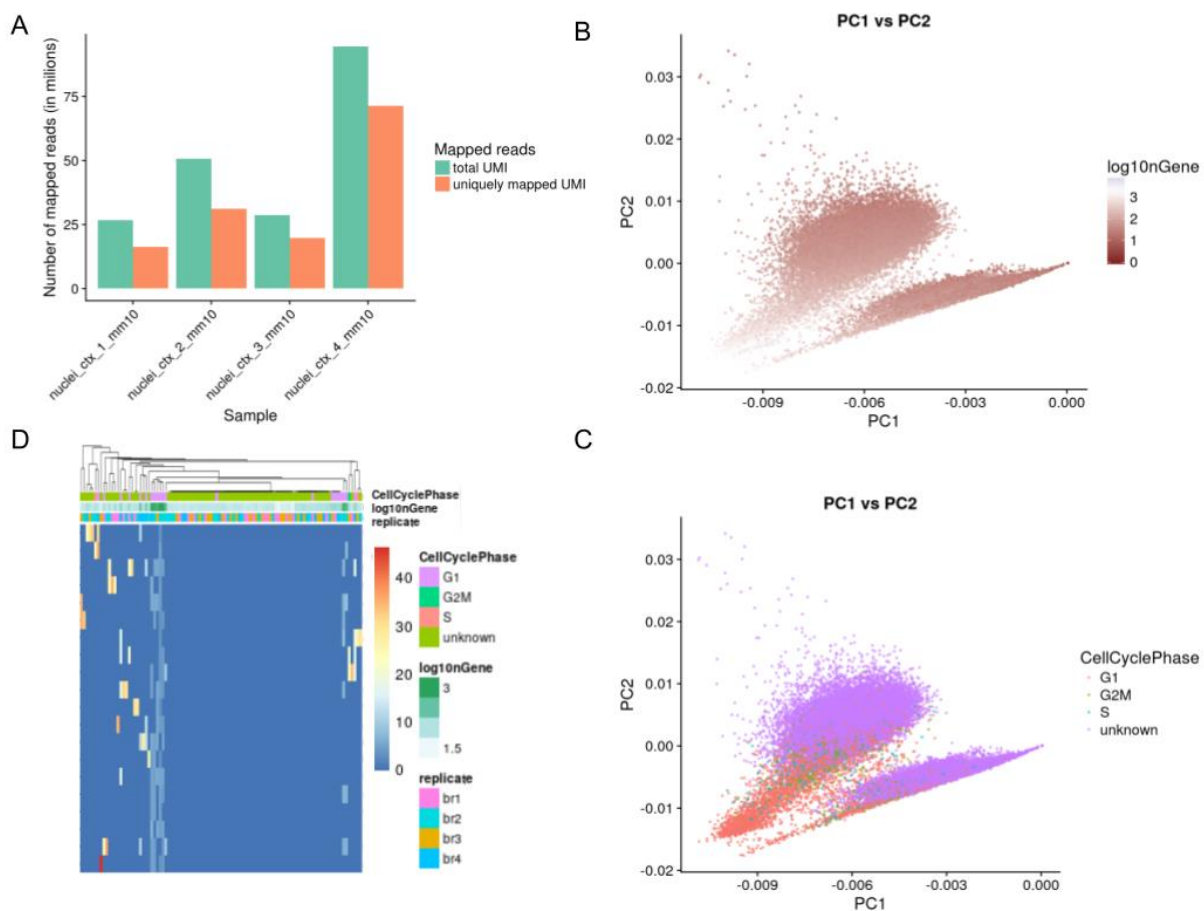

Figure 8

Sample output from the PiGx scRNA-seq pipeline. **A)** Abundance of total uniquely mapping UMIs per sample. **B)** Visualization of cells on the first and second principal component calculated from the normalized expression values. The gradient shows the total number of UMIs per cell. **C)** Same data representation as in B, but colored based on the cell cycle assignment. Cell cycle was assigned using the cyclone function from the scran Bioconductor package (A. T. Lun, McCarthy, and Marioni 2016). **D)** Expression heatmap of genes contributing most to the first principle component. Genes are ordered in rows, while cell are in columns. Color bars above the heatmap show relevant experimental variables.

## Reproducibility metrics of the pipelines in different systems

We define the complete software environment needed for each of the pipelines using Guix package definitions. These package specifications not only outline the immediate dependencies of the pipelines, but extend to the full software stack recursively. The dependency graph is rooted in a handful of bootstrap binaries. Apart from these binary roots, every application or



1  
2  
3  
4 library in the graph is built from source. Guix ensures that packages are built in an isolated  
5 environment in which nothing but the specified dependencies are available. This is a  
6 precondition for bit-reproducible builds, i.e. repeatable package builds that yield the very same  
7 binary output for the same set of inputs. Under ideal circumstances (see below), a Guix  
8 specification for the complete dependency graph and the set of all source code would be  
9 sufficient to exactly reproduce the very same binaries of the pipelines presented in this paper.  
10  
11

12  
13 Unfortunately, there are additional obstacles to bit-reproducibility that cannot be avoided purely  
14 by the functional package management model. Examples for sources of irreproducibility in build  
15 artefacts include embedded timestamps, non-deterministic sorting of strings, non-deterministic  
16 compiler output, and the like. While some of these obstacles can be removed by deliberate  
17 patching of compilers or applications, others are harder to diagnose and can thus lead to failure  
18 to reproduce the same arrangement of bits in independent builds, be that on the same machine  
19 at different points in time or on different systems. In the reports produced by our pipelines we  
20 can eliminate differences due to timestamps by controlling them with the  
21 `SOURCE_DATE_EPOCH` environment variable. This option can be invoked, in order to  
22 produce identical HTML reports, provided there are no tools that introduce non-determinism (as  
23 is the case for the PiGx BS-seq pipeline).  
24  
25  
26  
27

28  
29 To estimate the level of bit reproducibility in our pipelines, we checked out version v0.14.0-  
30 3597-g17967d1 of GNU Guix, repeatedly built the pipeline packages `pigx-rnaseq`, `pigx-`  
31 `bsseq`, `pigx-chipseq`, `pigx-scrnaseq` and their direct dependencies on three different  
32 systems (an office workstation, a virtual machine, and a build farm consisting of 20  
33 heterogeneous build nodes), and recorded the hashes of the package trees that were produced.  
34 Whenever the hashes of any two builds differed, we looked at the exact differences with  
35 `diffoscope` (<https://diffoscope.org/>). Upon closer inspection we identified a number of common  
36 issues in non-deterministic builds, such as timestamps embedded in compiled binaries and text  
37 files, or randomized file names in files generated by test suites.  
38  
39  
40

41  
42 Python dependencies are of particular note here, because they are generally not reproducible  
43 due to the fact that the byte compiler records the timestamp of the source file in the compiled  
44 binary. This means that all compiled Python files will differ when they are compiled at different  
45 points in time. (This problem will be addressed in the upcoming Python 3.7, which will  
46 implement PEP 552 for deterministic compilation.) To avoid this problem and increase the  
47 number of packages that could be made reproducible, we patched our variant of Python 3.6  
48 such that it resets the embedded timestamp in compiled files to the Unix epoch. This allowed us  
49 to greatly increase the number of fully bit-reproducible packages. As can be seen in Table 2,  
50 only a total of 8 out of 355 packages (or only about 2.2%) were not bit-reproducible for as-yet  
51 unknown reasons.  
52  
53  
54  
55

56  
57 Figure 9 shows the degree of bit-reproducibility for the direct dependencies of each of the  
58 individual pipeline packages. Dependent packages whose files differed compared to builds on  
59 other systems fell either in the category of “minor problems” or “not reproducible”, dependent on  
60 the source and magnitude of non-determinism. The exact dependency counts for each category  
61  
62  
63  
64  
65

and pipeline package are listed in Table 2. A comprehensive list of all dependent packages that were categorized as having “minor problems” is contained in Table 3. This table shows that the reproducibility problems of these packages are of negligible magnitude and could be corrected with minor patches to the package definitions in Guix.

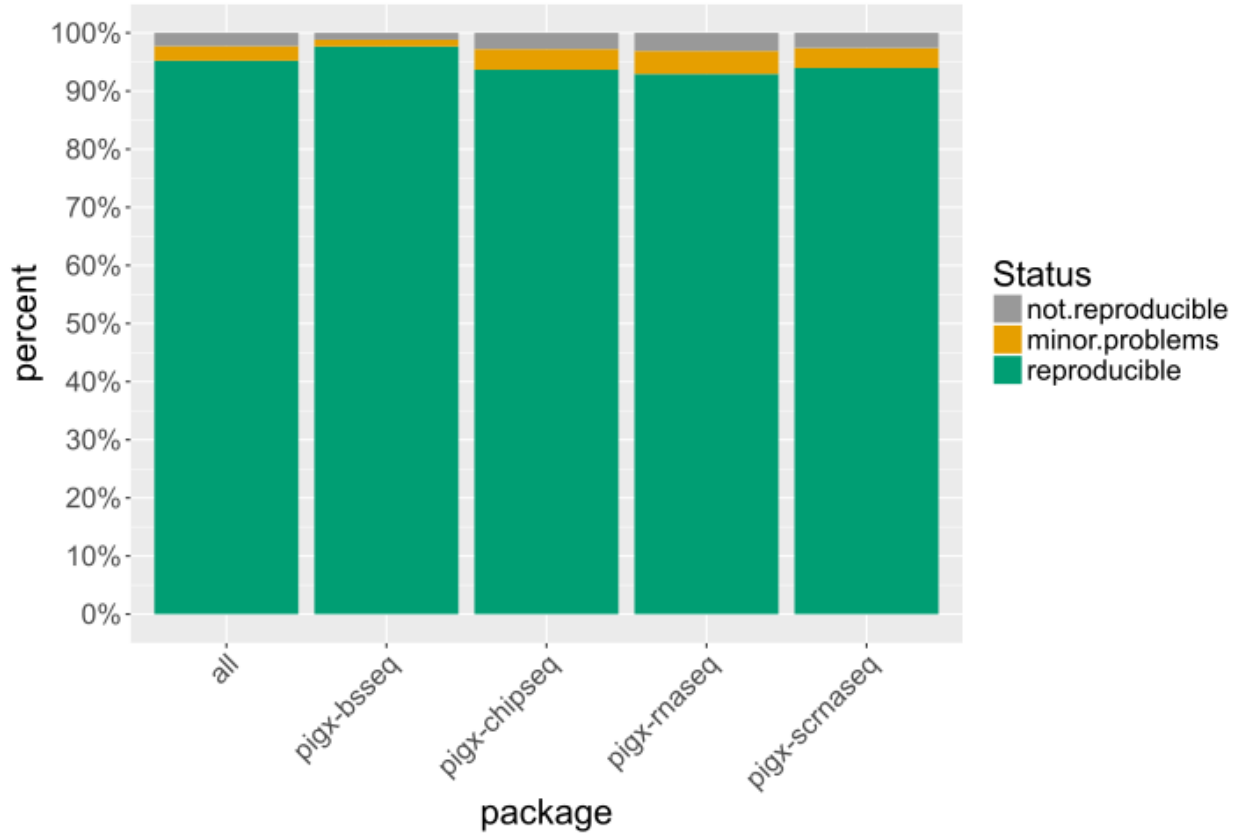

Figure 9  
Percentage of directly-dependent packages building in a bit-reproducible fashion across different systems for each of the pipelines.

| Package       | Not reproducible | Minor problems | Reproducible |
|---------------|------------------|----------------|--------------|
| pigx-bsseq    | 2                | 2              | 167          |
| pigx-chipseq  | 7                | 9              | 236          |
| pigx-rnaseq   | 7                | 9              | 211          |
| pigx-scrnaseq | 6                | 8              | 218          |
| All pipelines | 8                | 9              | 338          |

Table 2

Number of dependent packages and their reproducibility status. See Table 3 for more details about packages with minor problems.

| Package           | Magnitude | Notes                                      |
|-------------------|-----------|--------------------------------------------|
| r-minimal         | 2 bytes   | non-deterministic line break               |
| python            | ~ 6%      | timestamp byte in header of bytecode files |
| python-matplotlib | ~ 1.7%    | single file difference                     |
| python-pycparser  | ~ 3%      | single file with timestamp                 |
| python-cffi       | ~ 1.8%    | recorded random test file names            |
| python-numpy      | < 0.5%    | six bytecode files differ                  |
| python-simplejson | 2 bytes   | two files have single byte differences     |
| gtk+              | < 1%      | single file (icon cache)                   |
| glib              | < 0.1%    | single file difference                     |

Table 3

Table of packages with minor reproducibility problems and the magnitude of irreproducible files.

## Alternative ways to install the pipelines:

We generated application bundles containing all pipelines for use with Docker or Singularity. These container images were generated by exporting the "closure" (i.e. the package and all packages it references, recursively) of the `pigx` package (a package containing the individual pipeline packages `pigx-bsseq`, `pigx-chipseq`, `pigx-rnaseq`, and `pigx-scrnaseq`) from the declarative Guix package definition instead of iteratively modifying a base image containing a GNU+Linux operating system in a series of imperative steps. The container images are merely a translation of a functional description of the desired environment; as such, it is independent of global state, such as the contents of third-party package repositories or build time. The Docker image can be obtained at <https://hub.docker.com/r/bimsbbioinfo/pigx/>; the Singularity image can be downloaded from <https://bioinformatics.mdc-berlin.de/pigx/supplementary-materials.html>. We used Guix at commit `5149aeb7e62cf62398b55be38469cd28c25d8d7d` (version `v0.14.0-7054-g5149aeb7e`) to generate these container images. This is the same version that we used to install the variant of PiGx with which the plots and reports in this publication were generated.

1  
2  
3  
4 Since the pipelines use the well-known GNU build system as implemented by the Autotools  
5 suite, the pipelines can be configured and built in any environment providing the required  
6 dependencies. The portable configure script detects and records references to necessary  
7 software in the environment and reuses them at runtime using their absolute file names. Any  
8 package manager (such as Conda) can be used to fashion such a build-time environment. With  
9 regards to reproducibility, however, we recommend that a package manager be used that can  
10 provide separate, immutable, and uniquely prefixed environments to ensure that references to  
11 tools that are recorded at configuration time are identical to the variants that are used at  
12 runtime.  
13  
14  
15  
16  
17

## 18 Discussion

19  
20 Computational workflows are becoming an indispensable part of the biological sciences as the  
21 field becomes more data intensive. The diversity and amount of data requires many tools for  
22 analysis.  
23

24 Consequently, published software or workflows often come with a complex set of dependencies.  
25 Even if sensible guidelines (e.g. “Software with Impact” 2014), such as sharing code online and  
26 providing documentation, are employed, sometimes it is impossible to recreate the software  
27 used for analysis. Providing the code and documentation alone does not guarantee  
28 reproducibility or usability, nor do Docker containers completely remedy this problem.  
29

30 In addition to reproducibility, there is also an increasing need for traceability and transparency,  
31 for the purposes of comprehensive data security in applications that manage the sensitive data  
32 collected in biomedical studies.  
33  
34

35  
36 We propose GNU Guix and principled pipeline-as-software implementation as a solution to  
37 reproducibility problems in complex bioinformatics workflows. Here, we demonstrated the utility  
38 and the reproducibility of PiGx pipelines for genomics data analysis using GNU Guix.  
39  
40

41 Our decision to treat pipelines as first-class software packages and to adopt a conventional  
42 build system with Autotools made it possible to reduce the installation of complex software  
43 environments to a simple one-line command. By recording the exact locations of runtime  
44 dependencies of the pipeline packages during the configuration stage, we were able to  
45 eliminate ambiguity at runtime. When configuring the pipeline packages in an environment that  
46 ensures that different versions or variants of applications and libraries are stored in unique  
47 locations (such as an environment provided by GNU Guix), recording the exact location of  
48 dependencies at *configuration time* allows us to reproduce the detected environment at *runtime*.  
49  
50  
51

52 We have shown that with a recursive definition of software dependencies using the framework  
53 provided by the functional package management paradigm as implemented in GNU Guix, it is  
54 possible to fully and exhaustively describe complex production-level bioinformatics software  
55 environments on GNU+Linux systems. The software environments were fully specified at the  
56 level of declarative, stateless package abstractions instead of using an imperative, stateful  
57 approach. We have also shown that the principled declarative approach to the management of  
58 software environments facilitates bit-reproducibility. The higher-level definitions of software  
59 environments can be translated in an automated fashion to lower-level application bundles such  
60  
61  
62  
63  
64  
65

1  
2  
3  
4 as Docker images. In contrast with container systems like Docker or Singularity, Guix encloses  
5 the complete software environment and enables users to transparently rebuild it reproducibly  
6 from source without having to trust a binary application bundle. Due to referential transparency,  
7 binaries in Guix can only be the result of their corresponding sources.  
8

9  
10 Functional package management as implemented by GNU Guix significantly reduces the  
11 complexity of, and lowers the barrier to, managing bit-reproducible software environments.  
12 Users are freed from menial bookkeeping tasks such as keeping track of the origin of package  
13 binaries, the time of installation, the order of installation instructions, the state of the operating  
14 system at the time of installation, or any other runtime state. As far as users are concerned, it is  
15 enough to know the names of the packages that should be installed (in our case, simply “pigx”)  
16 and the current version of Guix; everything else such as source code provenance tracking,  
17 dependency management, package configuration, and compilation in isolated environments is  
18 handled by Guix. The guarantees provided by Guix enable users to analyze obstacles to  
19 experimental reproducibility beyond the software environment, such as sources of non-  
20 determinism at *runtime*.  
21

22  
23 In our attempts to analyze the degree of repeatability of the HTML reports produced by PiGx,  
24 we identified a number of such sources of non-determinism. The Salmon aligner, for example,  
25 has a random component and does not provide a way for users to specify a seed for the  
26 pseudo-random number generators. This makes it impossible to exactly repeat an analysis and  
27 may require patching of the Salmon source code or virtualization of the random number  
28 generator facilities of the host system. Other tools are sensitive to the user's locale settings and  
29 may generate output in non-deterministic order. We were also surprised to find that an  
30 increasingly large number of tools rely on a connection to the Internet, either directly or indirectly  
31 through dependent packages. This can be a great source of non-determinism if the  
32 experimental setup does not take the volatile nature of networked resources into account.  
33 Another important obstacle to reproducibility is the large kernel binary at runtime. Although the  
34 GNU C library provides a unified interface for all applications to use, the features that are  
35 actually implemented by the kernel at runtime may differ vastly. For example, the variant of  
36 Linux provided by Red Hat for their series 6 of operating systems reports its version as the  
37 obsolete and unsupported 2.6.32, but it contains many backported features from much newer  
38 kernel versions. Although this is usually not a problem, the kernel version and the implemented  
39 features should be taken into account. In order to make it possible to use the pipelines on Red  
40 Hat Enterprise Linux 6, we coordinated with other Guix developers to patch the GNU C library.  
41  
42  
43  
44

45  
46 The use of a declarative mechanism to managing software environments is fundamental to  
47 comprehensive reproducibility. This encompasses repeatable builds, bit-reproducible binaries,  
48 software and data provenance, control over the configuration space, and deterministic runtime  
49 behavior. We have shown the feasibility of this approach in the domain of bioinformatics, and  
50 propose that it serve as a template for reproducible computational workflows in other areas.  
51  
52  
53

## 54 Availability of source code and requirements

55 Project name: PiGx (pipelines in genomics)

56 Project home page: <https://github.com/BIMSBbioinfo/pigx>

57 Operating systems: any GNU/Linux system (kernel version > 3.10)  
58  
59  
60  
61  
62  
63  
64  
65

1  
2  
3  
4 Programming languages: primarily GNU R and Python 3.  
5 Other requirements: GNU Guix 0.15.0 or later for ready-made packages (if it is not possible to  
6 satisfy this requirement, Docker and Singularity images are provided)  
7 License: GNU General Public License version 3, or (at your option) any later version.  
8  
9 RRID: SCR\_016476  
10

## 11 12 13 Availability of supporting data 14

15 Snapshots of the code are available from the *GigaScience* GigaDB repository (Wurmus et al,  
16 2018).  
17  
18

## 19 20 Acknowledgements 21

22 We are grateful to the many volunteer contributors to GNU Guix who keep improving the  
23 system.  
24  
25

## 26 27 Funding 28

29 B.U acknowledges funding by the German Federal Ministry of Education and Research (BMBF)  
30 as part of the RNA Bioinformatics Center of the German Network for Bioinformatics  
31 Infrastructure (de.NBI) [031 A538C RBC (de.NBI)]. We also acknowledge support for K.W from  
32 Berlin Institute of Health (BIH). This project has received funding from the European Union's  
33 Horizon 2020 research and innovation programme under grant agreement No 654248  
34  
35  
36  
37  
38

## 39 40 References 41 42 43

- 44 Akalin, Altuna, Vedran Franke, Kristian Vlahoviček, Christopher E. Mason, and Dirk Schübeler.  
45 2015. "Genomation: A Toolkit to Summarize, Annotate and Visualize Genomic Intervals."  
46 *Bioinformatics* 31 (7): 1127–29.  
47  
48 Alles, Jonathan, Nikos Karaiskos, Samantha D. Praktijnjo, Stefanie Grosswendt, Philipp Wahle,  
49 Pierre-Louis Ruffault, Salah Ayoub, et al. 2017. "Cell Fixation and Preservation for Droplet-  
50 Based Single-Cell Transcriptomics." *BMC Biology* 15 (1): 44.  
51 Babraham, Bioinformatics. 2018a. "fastQC." 2018.  
52 <https://www.bioinformatics.babraham.ac.uk/projects/fastqc/>.  
53 ———. 2018b. "Trim Galore!" 2018.  
54 [https://www.bioinformatics.babraham.ac.uk/projects/trim\\_galore/](https://www.bioinformatics.babraham.ac.uk/projects/trim_galore/).  
55 Boettiger, Carl. 2015. "An Introduction to Docker for Reproducible Research." *ACM SIGOPS*  
56 *Operating Systems Review* 49 (1): 71–79.  
57 Courtès, Ludovic, and Ricardo Wurmus. "Reproducible and user-controlled software  
58 environments in HPC with Guix." *European Conference on Parallel Processing*. Springer,  
59 Cham, 2015.  
60  
61  
62  
63  
64  
65

- 1  
2  
3  
4 Dobin, Alexander, Carrie A. Davis, Felix Schlesinger, Jorg Drenkow, Chris Zaleski, Sonali Jha,  
5 Philippe Batut, Mark Chaisson, and Thomas R. Gingeras. 2013. "STAR: Ultrafast Universal  
6 RNA-Seq Aligner." *Bioinformatics* 29 (1): 15–21.
- 7 Dolstra, Eelco, Merijn De Jonge, and Eelco Visser. "Nix: A Safe and Policy-Free System for  
8 Software Deployment." *LISA*. Vol. 4. 2004.
- 9  
10 Ewels, Philip, Måns Magnusson, Sverker Lundin, and Max Käller. 2016. "MultiQC: Summarize  
11 Analysis Results for Multiple Tools and Samples in a Single Report." *Bioinformatics* 32 (19):  
12 3047–48.
- 13 Hon, Gary C., Chun-Xiao Song, Tingting Du, Fulai Jin, Siddarth Selvaraj, Ah Young Lee, Chia-  
14 An Yen, et al. 2014. "5mC Oxidation by Tet2 Modulates Enhancer Activity and Timing of  
15 Transcriptome Reprogramming during Differentiation." *Molecular Cell* 56 (2): 286–97.
- 16 Huber, Wolfgang, Vincent J. Carey, Robert Gentleman, Simon Anders, Marc Carlson, Benilton  
17 S. Carvalho, Hector Corrada Bravo, et al. 2015. "Orchestrating High-Throughput Genomic  
18 Analysis with Bioconductor." *Nature Methods* 12 (2): 115–21.
- 19  
20 Hu, Peng, Emily Fabyanic, Deborah Y. Kwon, Sheng Tang, Zhaolan Zhou, and Hao Wu. 2017.  
21 "Dissecting Cell-Type Composition and Activity-Dependent Transcriptional State in  
22 Mammalian Brains by Massively Parallel Single-Nucleus RNA-Seq." *Molecular Cell* 68 (5):  
23 1006–15.e7.
- 24 Klein, Allon M., Linas Mazutis, Ilke Akartuna, Naren Tallapragada, Adrian Veres, Victor Li,  
25 Leonid Peshkin, David A. Weitz, and Marc W. Kirschner. 2015. "Droplet Barcoding for  
26 Single-Cell Transcriptomics Applied to Embryonic Stem Cells." *Cell* 161 (5): 1187–1201.
- 27  
28 Kolde, Raivo. 2018. "Pheatmap: Pretty Heatmaps. R Package Version 1.0.8." CRAN.  
29 <https://CRAN.R-project.org/package=pheatmap>.
- 30 Köster, Johannes, and Sven Rahmann. 2012. "Snakemake--a Scalable Bioinformatics Workflow  
31 Engine." *Bioinformatics* 28 (19): 2520–22.
- 32  
33 Krueger, Felix, and Simon R. Andrews. 2011. "Bismark: A Flexible Aligner and Methylation  
34 Caller for Bisulfite-Seq Applications." *Bioinformatics* 27 (11): 1571–72.
- 35 Landt, Stephen G., Georgi K. Marinov, Anshul Kundaje, Pouya Kheradpour, Florencia Pauli,  
36 Serafim Batzoglou, Bradley E. Bernstein, et al. 2012. "ChIP-Seq Guidelines and Practices  
37 of the ENCODE and modENCODE Consortia." *Genome Research* 22 (9): 1813–31.
- 38 Langmead, Ben, and Steven L. Salzberg. 2012. "Fast Gapped-Read Alignment with Bowtie 2."  
39 *Nature Methods* 9 (4): 357–59.
- 40 Lawrence, Michael, Wolfgang Huber, Hervé Pagès, Patrick Aboyoun, Marc Carlson, Robert  
41 Gentleman, Martin T. Morgan, and Vincent J. Carey. 2013. "Software for Computing and  
42 Annotating Genomic Ranges." *PLoS Computational Biology* 9 (8): e1003118.
- 43 Li, Heng, Bob Handsaker, Alec Wysoker, Tim Fennell, Jue Ruan, Nils Homer, Gabor Marth,  
44 Goncalo Abecasis, Richard Durbin, and 1000 Genome Project Data Processing Subgroup.  
45 2009. "The Sequence Alignment/Map Format and SAMtools." *Bioinformatics* 25 (16): 2078–  
46 79.
- 47  
48 Linnarsson. 2018. "Loompy: Python Implementation of the Loom File Format." 2018.  
49 <http://loompy.org>.
- 50 Li, Qunhua, James B. Brown, Haiyan Huang, and Peter J. Bickel. 2011. "Measuring  
51 Reproducibility of High-Throughput Experiments." *The Annals of Applied Statistics* 5 (3):  
52 1752–79.
- 53  
54 Love, Michael I., Wolfgang Huber, and Simon Anders. 2014. "Moderated Estimation of Fold  
55 Change and Dispersion for RNA-Seq Data with DESeq2." *Genome Biology* 15 (12): 550.
- 56 Lun, Aaran, Kevin Rue, Federico Marini, C. Soneson, and Mark Robinson. 2018. "iSEE -  
57 Interactive SummarizedExperiment/SingleCellExperiment Explorer." 2018.  
58 <https://github.com/csoneson/iSEE>.
- 59  
60 Lun, Aaron, and Davide Risso. 2018. "Single Cell Experiment: S4 Classes for Single Cell Data."  
61 *Bioconductor*.
- 62  
63  
64  
65

- 1  
2  
3  
4 Lun, Aaron T. L., Davis J. McCarthy, and John C. Marioni. 2016. "A Step-by-Step Workflow for  
5 Low-Level Analysis of Single-Cell RNA-Seq Data with Bioconductor." *F1000Research* 5  
6 (August): 2122.
- 7  
8 Macosko, Evan Z., Anindita Basu, Rahul Satija, James Nemesh, Karthik Shekhar, Melissa  
9 Goldman, Itay Tirosh, et al. 2015. "Highly Parallel Genome-Wide Expression Profiling of  
10 Individual Cells Using Nanoliter Droplets." *Cell* 161 (5): 1202–14.
- 11 Pagès, Hervé. 2018. "DelayedArray: Delayed Operations on Array-like Objects." *Bioconductor*.
- 12 Patro, Rob, Geet Duggal, Michael I. Love, Rafael A. Irizarry, and Carl Kingsford. 2017. "Salmon  
13 Provides Fast and Bias-Aware Quantification of Transcript Expression." *Nature Methods* 14  
14 (4): 417–19.
- 15 Peng, Roger D. 2011. "Reproducible Research in Computational Science." *Science* 334 (6060):  
16 1226–27.
- 17  
18 Quinlan, Aaron R., and Ira M. Hall. 2010. "BEDTools: A Flexible Suite of Utilities for Comparing  
19 Genomic Features." *Bioinformatics* 26 (6): 841–42.
- 20 Rampal, Raajit, Altuna Alkalin, Jozef Madzo, Aparna Vasanthakumar, Elodie Pronier, Jay Patel,  
21 Yushan Li, et al. 2014. "DNA Hydroxymethylation Profiling Reveals That WT1 Mutations  
22 Result in Loss of TET2 Function in Acute Myeloid Leukemia." *Cell Reports* 9 (5): 1841–55.
- 23 Reimand, Jüri, Meelis Kull, Hedi Peterson, Jaanus Hansen, and Jaak Vilo. 2007. "g:Profiler--a  
24 Web-Based Toolset for Functional Profiling of Gene Lists from Large-Scale Experiments."  
25 *Nucleic Acids Research* 35 (Web Server issue): W193–200.
- 26  
27 Risso, Davide, Fanny Perraudeau, Svetlana Gribkova, Sandrine Dudoit, and Jean-Philippe Vert.  
28 2018. "A General and Flexible Method for Signal Extraction from Single-Cell RNA-Seq  
29 Data." *Nature Communications* 9 (1): 284.
- 30 Robinson, James T., Helga Thorvaldsdóttir, Wendy Winckler, Mitchell Guttman, Eric S. Lander,  
31 Gad Getz, and Jill P. Mesirov. 2011. "Integrative Genomics Viewer." *Nature Biotechnology*  
32 29 (1): 24–26.
- 33 Ronen, Jonathan, and Altuna Akalin. 2018. "Network-Smoothing Based Imputation for Single  
34 Cell RNA-Seq." *F1000Research* 7 (January): 8.
- 35 Shu, Rui, Xiaohui Gu, and William Enck. 2017. "A Study of Security Vulnerabilities on Docker  
36 Hub". In *Proceedings of the Seventh ACM on Conference on Data and Application Security*  
37 *and Privacy (CODASPY '17)*. ACM, New York, NY, USA, 269-280. DOI:  
38 <https://doi.org/10.1145/3029806.3029832>
- 39 "Software with Impact." 2014. *Nature Methods* 11 (February). Nature Publishing Group, a  
40 division of Macmillan Publishers Limited. All Rights Reserved.: 211.
- 41  
42 Thorvaldsdóttir, Helga, James T. Robinson, and Jill P. Mesirov. 2013. "Integrative Genomics  
43 Viewer (IGV): High-Performance Genomics Data Visualization and Exploration." *Briefings in*  
44 *Bioinformatics* 14 (2): 178–92.
- 45 Wurmus R; Uyar B; Osberg B; Franke V; Gosdschan A; Wreczycka K; Ronen J; Akalin A  
46 (2018): Supporting data for "PiGx: Reproducible genomics analysis pipelines with GNU  
47 Guix" GigaScience Database. <http://dx.doi.org/10.5524/100501>  
48  
49
- 50 Zhang, Yong, Tao Liu, Clifford A. Meyer, Jérôme Eeckhoute, David S. Johnson, Bradley E.  
51 Bernstein, Chad Nusbaum, et al. 2008. "Model-Based Analysis of ChIP-Seq (MACS)."  
52 *Genome Biology* 9 (9): R137.  
53  
54  
55  
56  
57  
58  
59  
60  
61  
62  
63  
64  
65
